# Supplementary material
Source: PubMed Central journal article supplement (PMC10170224)
Supplement: sj-pdf-2-sph-10.1177_19417381221109224.pdf [file sj-pdf-2-sph-10.1177_19417381221109224.pdf]

GET

```
FILE='/Users//OneDrive - /RCT Study/Kids RCT/Kids_RCT_final.sav'.  
DATASET NAME DataSet1 WINDOW=FRONT.  
* Generalized Estimating Equations.  
GENLIN Incident (REFERENCE=FIRST) BY Intervention (ORDER=ASCENDING)  
  /MODEL Intervention INTERCEPT=YES  
  DISTRIBUTION=BINOMIAL LINK=LOGIT  
  /CRITERIA METHOD=FISHER(1) SCALE=1 MAXITERATIONS=100 MAXSTEPHALVING=5  
PCONVERGE=1E-006(ABSOLUTE)  
  SINGULAR=1E-012 ANALYSISTYPE=3(WALD) CILEVEL=95 LIKELIHOOD=FULL  
/EMMEANS TABLES=Intervention SCALE=ORIGINAL  
/REPEATED SUBJECT=Team WITHINSUBJECT=Player SORT=YES CORRTYPE=INDEPENDENT ADJUSTCORR=YES  
  COVB=ROBUST MAXITERATIONS=100 PCONVERGE=1e-006(ABSOLUTE) UPDATECORR=1  
/MISSING CLASSMISSING=EXCLUDE  
/PRINT CPS DESCRIPTIVES MODELINFO FIT SUMMARY SOLUTION (EXPONENTIATED).
```

### Generalized Linear Models

| Notes                  |                                |                                                                                                      |
|------------------------|--------------------------------|------------------------------------------------------------------------------------------------------|
| Output Created         |                                | 11-SEP-2020 03:04:29                                                                                 |
| Comments               |                                |                                                                                                      |
| Input                  | Data                           | /Users//OneDrive - /RCT Study/Kids RCT/Kids_RCT_final.sav                                            |
|                        | Active Dataset                 | DataSet1                                                                                             |
|                        | Filter                         | <none>                                                                                               |
|                        | Weight                         | <none>                                                                                               |
|                        | Split File                     | <none>                                                                                               |
|                        | N of Rows in Working Data File | 94                                                                                                   |
| Missing Value Handling | Definition of Missing          | User-defined missing values for factor, subject and within-subject variables are treated as missing. |
|                        | Cases Used                     | Statistics are based on cases with valid data for all variables in the model.                        |
| Weight Handling        |                                | not applicable                                                                                       |

|           |                                                                                                                                                                                                                                                                                                                                                                                                                                                                                                                                                                                                                                               |             |
|-----------|-----------------------------------------------------------------------------------------------------------------------------------------------------------------------------------------------------------------------------------------------------------------------------------------------------------------------------------------------------------------------------------------------------------------------------------------------------------------------------------------------------------------------------------------------------------------------------------------------------------------------------------------------|-------------|
| Syntax    | <pre> GENLIN Incident (REFERENCE=FIRST) BY Intervention (ORDER=ASCENDING)  /MODEL Intervention INTERCEPT=YES DISTRIBUTION=BINOMIAL LINK=LOGIT  /CRITERIA METHOD=FISHER(1) SCALE=1 MAXITERATIONS=100 MAXSTEPHALVING=5 PCONVERGE=1E-006(ABSOLUT E) SINGULAR=1E-012 ANALYSISTYPE=3(WALD) CILEVEL=95 LIKELIHOOD=FULL  /EMMEANS TABLES=Intervention SCALE=ORIGINAL  /REPEATED SUBJECT=Team WITHINSUBJECT=Player SORT=YES CORRTYPE=INDEPENDENT ADJUSTCORR=YES COVB=ROBUST MAXITERATIONS=100 PCONVERGE=1e-006(ABSOLUT E) UPDATECORR=1  /MISSING CLASSMISSING=EXCLUDE  /PRINT CPS DESCRIPTIVES MODELINFO FIT SUMMARY SOLUTION (EXPONENTIATED). </pre> |             |
| Resources | Processor Time                                                                                                                                                                                                                                                                                                                                                                                                                                                                                                                                                                                                                                | 00:00:00.06 |
|           | Elapsed Time                                                                                                                                                                                                                                                                                                                                                                                                                                                                                                                                                                                                                                  | 00:00:00.00 |

[DataSet1] /Users//OneDrive - /RCT Study/Kids RCT/Kids\_RCT\_final.sav

### Model Information

|                                      |                       |
|--------------------------------------|-----------------------|
| Dependent Variable                   | Incident <sup>a</sup> |
| Probability Distribution             | Binomial              |
| Link Function                        | Logit                 |
| Subject Effect                       | 1<br>Team             |
| Within-Subject Effect                | 1<br>Player           |
| Working Correlation Matrix Structure | Independent           |

a. The procedure models 1 as the response, treating 0 as the reference category.

### Case Processing Summary

|          | N  | Percent |
|----------|----|---------|
| Included | 94 | 100.0%  |
| Excluded | 0  | 0.0%    |
| Total    | 94 | 100.0%  |

### Correlated Data Summary

|                            |                       |        |    |
|----------------------------|-----------------------|--------|----|
| Number of Levels           | Subject Effect        | Team   | 6  |
|                            | Within-Subject Effect | Player | 94 |
| Number of Subjects         |                       |        | 6  |
| Number of Measurements per | Minimum               |        | 13 |

|                              |         |    |
|------------------------------|---------|----|
| Subject                      | Maximum | 20 |
| Correlation Matrix Dimension |         | 94 |

### Categorical Variable Information

| Dependent Variable | Incident     |              | N  | Percent |
|--------------------|--------------|--------------|----|---------|
|                    |              | 0            | 9  | 9.6%    |
|                    |              | 1            | 85 | 90.4%   |
|                    |              | Total        | 94 | 100.0%  |
| Factor             | Intervention |              |    |         |
|                    |              | Control      | 47 | 50.0%   |
|                    |              | Intervention | 47 | 50.0%   |
|                    |              | Total        | 94 | 100.0%  |

### Goodness of Fit<sup>a</sup>

|                                                                                   | Value  |
|-----------------------------------------------------------------------------------|--------|
| Quasi Likelihood under Independence Model Criterion (QIC) <sup>b</sup>            | 55.690 |
| Corrected Quasi Likelihood under Independence Model Criterion (QICC) <sup>b</sup> | 56.564 |

Dependent Variable: Incident

Model: (Intercept), Intervention<sup>a</sup>

a. Information criteria are in smaller-is-better form.

b. Computed using the full log quasi-likelihood function.

### Tests of Model Effects

| Source       | Wald Chi-Square | Type III df | Sig. |
|--------------|-----------------|-------------|------|
| (Intercept)  | 34.738          | 1           | .000 |
| Intervention | 4.885           | 1           | .027 |

Dependent Variable: Incident

Model: (Intercept), Intervention

### Parameter Estimates

| Parameter        | B              | Std. Error | 95% Wald Confidence Interval |       | Hypothesis Test |    |      | Exp(B) |
|------------------|----------------|------------|------------------------------|-------|-----------------|----|------|--------|
|                  |                |            | Lower                        | Upper | Wald Chi-Square | df | Sig. |        |
| (Intercept)      | 1.584          | .3377      | .922                         | 2.246 | 21.999          | 1  | .000 | 4.875  |
| [Intervention=0] | 2.245          | 1.0155     | .254                         | 4.235 | 4.885           | 1  | .027 | 9.436  |
| [Intervention=1] | 0 <sup>a</sup> | .          | .                            | .     | .               | .  | .    | 1      |
| (Scale)          | 1              |            |                              |       |                 |    |      |        |

### Parameter Estimates

| Parameter        | 95% Wald Confidence Interval for Exp(B) |        |
|------------------|-----------------------------------------|--------|
|                  | Lower                                   | Upper  |
| (Intercept)      | 2.515                                   | 9.451  |
| [Intervention=0] | 1.289                                   | 69.053 |
| [Intervention=1] | .                                       | .      |
| (Scale)          |                                         |        |

Dependent Variable: Incident

Model: (Intercept), Intervention

a. Set to zero because this parameter is redundant.

### Estimated Marginal Means: Intervention

| Intervention | Estimates |            |       | 95% Wald Confidence Interval |  |
|--------------|-----------|------------|-------|------------------------------|--|
|              | Mean      | Std. Error | Lower | Upper                        |  |
| Control      | .98       | .019       | .89   | 1.00                         |  |
| Intervention | .83       | .048       | .72   | .90                          |  |

\* Generalized Estimating Equations.

GENLIN injury\_number BY Intervention (ORDER=ASCENDING)

/MODEL Intervention INTERCEPT=YES

DISTRIBUTION=POISSON LINK=LOG

/CRITERIA METHOD=FISHER(1) SCALE=1 MAXITERATIONS=100 MAXSTEPHALVING=5

PCONVERGE=1E-006(ABSOLUTE)

SINGULAR=1E-012 ANALYSISTYPE=3(WALD) CILEVEL=95 LIKELIHOOD=FULL

/EMMEANS TABLES=Intervention SCALE=ORIGINAL

/REPEATED SUBJECT=Team WITHINSUBJECT=Player SORT=YES CORRTYPE=INDEPENDENT ADJUSTCORR=YES

COVB=ROBUST MAXITERATIONS=100 PCONVERGE=1e-006(ABSOLUTE) UPDATECORR=1

/MISSING CLASSMISSING=EXCLUDE

/PRINT CPS DESCRIPTIVES MODELINFO FIT SUMMARY SOLUTION (EXPONENTIATED).

## Generalized Linear Models

| Notes                  |                                |                                                                                                      |
|------------------------|--------------------------------|------------------------------------------------------------------------------------------------------|
| Output Created         |                                | 11-SEP-2020 03:05:23                                                                                 |
| Comments               |                                |                                                                                                      |
| Input                  | Data                           | /Users//OneDrive - /RCT<br>Study/Kids<br>RCT/Kids_RCT_final.sav                                      |
|                        | Active Dataset                 | DataSet1                                                                                             |
|                        | Filter                         | <none>                                                                                               |
|                        | Weight                         | <none>                                                                                               |
|                        | Split File                     | <none>                                                                                               |
|                        | N of Rows in Working Data File | 94                                                                                                   |
| Missing Value Handling | Definition of Missing          | User-defined missing values for factor, subject and within-subject variables are treated as missing. |
|                        | Cases Used                     | Statistics are based on cases with valid data for all variables in the model.                        |
| Weight Handling        |                                | not applicable                                                                                       |

|           |                                                                                                                                                                                                                                                                                                                                                                                                                                                                                                                                                                                                                                       |             |
|-----------|---------------------------------------------------------------------------------------------------------------------------------------------------------------------------------------------------------------------------------------------------------------------------------------------------------------------------------------------------------------------------------------------------------------------------------------------------------------------------------------------------------------------------------------------------------------------------------------------------------------------------------------|-------------|
| Syntax    | <pre> GENLIN injury_number BY Intervention (ORDER=ASCENDING)  /MODEL Intervention INTERCEPT=YES DISTRIBUTION=POISSON LINK=LOG  /CRITERIA METHOD=FISHER(1) SCALE=1 MAXITERATIONS=100 MAXSTEPHALVING=5 PCONVERGE=1E-006(ABSOLUT E)     SINGULAR=1E-012 ANALYSISTYPE=3(WALD) CILEVEL=95 LIKELIHOOD=FULL  /EMMEANS TABLES=Intervention SCALE=ORIGINAL  /REPEATED SUBJECT=Team WITHINSUBJECT=Player SORT=YES CORRTYPE=INDEPENDENT ADJUSTCORR=YES     COVB=ROBUST MAXITERATIONS=100 PCONVERGE=1e-006(ABSOLUT E) UPDATECORR=1  /MISSING CLASSMISSING=EXCLUDE  /PRINT CPS DESCRIPTIVES MODELINFO FIT SUMMARY SOLUTION (EXPONENTIATED). </pre> |             |
| Resources | Processor Time                                                                                                                                                                                                                                                                                                                                                                                                                                                                                                                                                                                                                        | 00:00:00.08 |
|           | Elapsed Time                                                                                                                                                                                                                                                                                                                                                                                                                                                                                                                                                                                                                          | 00:00:00.00 |

### Model Information

|                                      |               |        |
|--------------------------------------|---------------|--------|
| Dependent Variable                   | injury_number |        |
| Probability Distribution             | Poisson       |        |
| Link Function                        | Log           |        |
| Subject Effect                       | 1             | Team   |
| Within-Subject Effect                | 1             | Player |
| Working Correlation Matrix Structure | Independent   |        |

### Case Processing Summary

|          | N  | Percent |
|----------|----|---------|
| Included | 94 | 100.0%  |
| Excluded | 0  | 0.0%    |
| Total    | 94 | 100.0%  |

### Correlated Data Summary

|                                    |                       |        |    |
|------------------------------------|-----------------------|--------|----|
| Number of Levels                   | Subject Effect        | Team   | 6  |
|                                    | Within-Subject Effect | Player | 94 |
| Number of Subjects                 |                       |        | 6  |
| Number of Measurements per Subject | Minimum               | 13     |    |
|                                    | Maximum               | 20     |    |
| Correlation Matrix Dimension       |                       |        | 94 |

### Categorical Variable Information

| Factor       |         | N  | Percent |
|--------------|---------|----|---------|
| Intervention | Control | 47 | 50.0%   |

|  |              |    |        |
|--|--------------|----|--------|
|  | Intervention | 47 | 50.0%  |
|  | Total        | 94 | 100.0% |

**Continuous Variable Information**

| Dependent Variable | injury_number | N  | Minimum | Maximum | Mean | Std. Deviation |
|--------------------|---------------|----|---------|---------|------|----------------|
|                    |               | 94 | 0       | 4       | 1.47 | .912           |

**Goodness of Fit<sup>a</sup>**

|                                                                                   | Value  |
|-----------------------------------------------------------------------------------|--------|
| Quasi Likelihood under Independence Model Criterion (QIC) <sup>b</sup>            | 42.541 |
| Corrected Quasi Likelihood under Independence Model Criterion (QICC) <sup>b</sup> | 45.661 |

Dependent Variable: injury\_number

Model: (Intercept), Intervention<sup>a</sup>

a. Information criteria are in smaller-is-better form.

b. Computed using the full log quasi-likelihood function.

**Tests of Model Effects**

| Source       | Wald Chi-Square | Type III df | Sig. |
|--------------|-----------------|-------------|------|
| (Intercept)  | 76.909          | 1           | .000 |
| Intervention | 66.085          | 1           | .000 |

Dependent Variable: injury\_number

Model: (Intercept), Intervention

**Parameter Estimates**

| Parameter        | B              | Std. Error | 95% Wald Confidence Interval |       | Hypothesis Test |    |      | Exp(B) |
|------------------|----------------|------------|------------------------------|-------|-----------------|----|------|--------|
|                  |                |            | Lower                        | Upper | Wald Chi-Square | df | Sig. |        |
| (Intercept)      | -.043          | .0609      | -.163                        | .076  | .510            | 1  | .475 | .957   |
| [Intervention=0] | .726           | .0893      | .551                         | .901  | 66.085          | 1  | .000 | 2.067  |
| [Intervention=1] | 0 <sup>a</sup> | .          | .                            | .     | .               | .  | .    | 1      |
| (Scale)          | 1              |            |                              |       |                 |    |      |        |

**Parameter Estimates**

| Parameter        | 95% Wald Confidence Interval for Exp(B) |       |
|------------------|-----------------------------------------|-------|
|                  | Lower                                   | Upper |
| (Intercept)      | .850                                    | 1.079 |
| [Intervention=0] | 1.735                                   | 2.462 |
| [Intervention=1] | .                                       | .     |
| (Scale)          |                                         |       |

Dependent Variable: injury\_number

Model: (Intercept), Intervention

a. Set to zero because this parameter is redundant.

**Estimated Marginal Means: Intervention**

| Intervention | Mean | Std. Error | Estimates                          |       |
|--------------|------|------------|------------------------------------|-------|
|              |      |            | 95% Wald Confidence Interval Lower | Upper |
| Control      | 1.98 | .107       | 1.78                               | 2.20  |

|              |     |      |     |      |
|--------------|-----|------|-----|------|
| Intervention | .96 | .058 | .85 | 1.08 |
|--------------|-----|------|-----|------|

\* Generalized Estimating Equations.

GENLIN Reinjure\_all (REFERENCE=FIRST) BY Intervention (ORDER=ASCENDING)

/MODEL Intervention INTERCEPT=YES

DISTRIBUTION=BINOMIAL LINK=LOGIT

/CRITERIA METHOD=FISHER(1) SCALE=1 MAXITERATIONS=100 MAXSTEPHALVING=5

PCONVERGE=1E-006(ABSOLUTE)

SINGULAR=1E-012 ANALYSISTYPE=3(WALD) CILEVEL=95 LIKELIHOOD=FULL

/EMMEANS TABLES=Intervention SCALE=ORIGINAL

/REPEATED SUBJECT=Team WITHINSUBJECT=Player SORT=YES CORRTYPE=INDEPENDENT ADJUSTCORR=YES

COVB=ROBUST MAXITERATIONS=100 PCONVERGE=1e-006(ABSOLUTE) UPDATECORR=1

/MISSING CLASSMISSING=EXCLUDE

/PRINT CPS DESCRIPTIVES MODELINFO SUMMARY SOLUTION (EXPONENTIATED).

## Generalized Linear Models

|                        |                                | Notes                                                                                                |
|------------------------|--------------------------------|------------------------------------------------------------------------------------------------------|
| Output Created         |                                | 11-SEP-2020 03:06:04                                                                                 |
| Comments               |                                |                                                                                                      |
| Input                  | Data                           | /Users//OneDrive - /RCT<br>Study/Kids<br>RCT/Kids_RCT_final.sav                                      |
|                        | Active Dataset                 | DataSet1                                                                                             |
|                        | Filter                         | <none>                                                                                               |
|                        | Weight                         | <none>                                                                                               |
|                        | Split File                     | <none>                                                                                               |
|                        | N of Rows in Working Data File | 94                                                                                                   |
| Missing Value Handling | Definition of Missing          | User-defined missing values for factor, subject and within-subject variables are treated as missing. |
|                        | Cases Used                     | Statistics are based on cases with valid data for all variables in the model.                        |
| Weight Handling        |                                | not applicable                                                                                       |

|           |                                                                                                                                                                                                                                                                                                                                                                                                                                                                                                                                                                                                                                               |             |
|-----------|-----------------------------------------------------------------------------------------------------------------------------------------------------------------------------------------------------------------------------------------------------------------------------------------------------------------------------------------------------------------------------------------------------------------------------------------------------------------------------------------------------------------------------------------------------------------------------------------------------------------------------------------------|-------------|
| Syntax    | <pre> GENLIN Reinjure_all (REFERENCE=FIRST) BY Intervention (ORDER=ASCENDING)  /MODEL Intervention INTERCEPT=YES DISTRIBUTION=BINOMIAL LINK=LOGIT  /CRITERIA METHOD=FISHER(1) SCALE=1 MAXITERATIONS=100 MAXSTEPHALVING=5 PCONVERGE=1E-006(ABSOLUT E) SINGULAR=1E-012 ANALYSISTYPE=3(WALD) CILEVEL=95 LIKELIHOOD=FULL  /EMMEANS TABLES=Intervention SCALE=ORIGINAL  /REPEATED SUBJECT=Team WITHINSUBJECT=Player SORT=YES CORRTYPE=INDEPENDENT ADJUSTCORR=YES COVB=ROBUST MAXITERATIONS=100 PCONVERGE=1e-006(ABSOLUT E) UPDATECORR=1  /MISSING CLASSMISSING=EXCLUDE  /PRINT CPS DESCRIPTIVES MODELINFO SUMMARY SOLUTION (EXPONENTIATED). </pre> |             |
| Resources | Processor Time                                                                                                                                                                                                                                                                                                                                                                                                                                                                                                                                                                                                                                | 00:00:00.06 |
|           | Elapsed Time                                                                                                                                                                                                                                                                                                                                                                                                                                                                                                                                                                                                                                  | 00:00:00.00 |

### Model Information

|                                      |   |                           |
|--------------------------------------|---|---------------------------|
| Dependent Variable                   |   | Reinjure_all <sup>a</sup> |
| Probability Distribution             |   | Binomial                  |
| Link Function                        |   | Logit                     |
| Subject Effect                       | 1 | Team                      |
| Within-Subject Effect                | 1 | Player                    |
| Working Correlation Matrix Structure |   | Independent               |

a. The procedure models 1.00 as the response, treating .00 as the reference category.

### Case Processing Summary

|          | N  | Percent |
|----------|----|---------|
| Included | 94 | 100.0%  |
| Excluded | 0  | 0.0%    |
| Total    | 94 | 100.0%  |

### Correlated Data Summary

|                                    |                       |        |    |
|------------------------------------|-----------------------|--------|----|
| Number of Levels                   | Subject Effect        | Team   | 6  |
|                                    | Within-Subject Effect | Player | 94 |
| Number of Subjects                 |                       |        | 6  |
| Number of Measurements per Subject | Minimum               |        | 13 |
|                                    | Maximum               |        | 20 |
| Correlation Matrix Dimension       |                       |        | 94 |



**Categorical Variable Information**

|                    |              |              | N  | Percent |
|--------------------|--------------|--------------|----|---------|
| Dependent Variable | Reinjure_all | .00          | 87 | 92.6%   |
|                    |              | 1.00         | 7  | 7.4%    |
|                    |              | Total        | 94 | 100.0%  |
| Factor             | Intervention | Control      | 47 | 50.0%   |
|                    |              | Intervention | 47 | 50.0%   |
|                    |              | Total        | 94 | 100.0%  |

**Tests of Model Effects**

| Source       | Wald Chi-Square | Type III df | Sig. |
|--------------|-----------------|-------------|------|
| (Intercept)  | 21.222          | 1           | .000 |
| Intervention | .406            | 1           | .524 |

Dependent Variable: Reinjure\_all

Model: (Intercept), Intervention

**Parameter Estimates**

| Parameter        | B              | Std. Error | 95% Wald Confidence Interval |        | Hypothesis Test |    |      | Exp(B) |
|------------------|----------------|------------|------------------------------|--------|-----------------|----|------|--------|
|                  |                |            | Lower                        | Upper  | Wald Chi-Square | df | Sig. |        |
| (Intercept)      | -3.114         | .9537      | -4.983                       | -1.244 | 10.657          | 1  | .001 | .044   |
| [Intervention=0] | .985           | 1.5470     | -2.047                       | 4.017  | .406            | 1  | .524 | 2.679  |
| [Intervention=1] | 0 <sup>a</sup> | .          | .                            | .      | .               | .  | .    | 1      |
| (Scale)          | 1              |            |                              |        |                 |    |      |        |

**Parameter Estimates**

| Parameter        | 95% Wald Confidence Interval for Exp(B) |        |
|------------------|-----------------------------------------|--------|
|                  | Lower                                   | Upper  |
| (Intercept)      | .007                                    | .288   |
| [Intervention=0] | .129                                    | 55.549 |
| [Intervention=1] | .                                       | .      |
| (Scale)          |                                         |        |

Dependent Variable: Reinjure\_all

Model: (Intercept), Intervention

a. Set to zero because this parameter is redundant.

**Estimated Marginal Means: Intervention**

| Intervention | Estimates |            |                              |       |
|--------------|-----------|------------|------------------------------|-------|
|              | Mean      | Std. Error | 95% Wald Confidence Interval |       |
|              |           |            | Lower                        | Upper |
| Control      | .11       | .092       | .02                          | .44   |
| Intervention | .04       | .039       | .01                          | .22   |

USE ALL.

COMPUTE filter\_\$=(Incident > 0).

VARIABLE LABELS filter\_\$ 'Incident > 0 (FILTER)'.  
 VALUE LABELS filter\_\$ 0 'Not Selected' 1 'Selected'.  
 FORMATS filter\_\$ (f1.0).  
 FILTER BY filter\_\$.  
 EXECUTE.

\* Generalized Estimating Equations.

GENLIN Severity (ORDER=ASCENDING) BY Intervention (ORDER=ASCENDING)

/MODEL Intervention

DISTRIBUTION=MULTINOMIAL LINK=CUMLOGIT

/CRITERIA METHOD=FISHER(1) SCALE=1 MAXITERATIONS=100 MAXSTEPHALVING=5

PCONVERGE=1E-006(ABSOLUTE)

SINGULAR=1E-012 ANALYSISTYPE=3(WALD) CILEVEL=95 LIKELIHOOD=FULL  
 /REPEATED SUBJECT=Team WITHINSUBJECT=Player SORT=YES CORRTYPE=INDEPENDENT ADJUSTCORR=YES  
 COVB=ROBUST MAXITERATIONS=100 PCONVERGE=1e-006(ABSOLUTE) UPDATECORR=1  
 /MISSING CLASSMISSING=EXCLUDE  
 /PRINT CPS DESCRIPTIVES MODELINFO SUMMARY SOLUTION (EXPONENTIATED).

## Generalized Linear Models

| Notes                  |                                |                                                                                                                                                                                                                                                                                                                                                                                                                                                                                                                                                                                                                                                             |
|------------------------|--------------------------------|-------------------------------------------------------------------------------------------------------------------------------------------------------------------------------------------------------------------------------------------------------------------------------------------------------------------------------------------------------------------------------------------------------------------------------------------------------------------------------------------------------------------------------------------------------------------------------------------------------------------------------------------------------------|
| Output Created         |                                | 11-SEP-2020 03:07:22                                                                                                                                                                                                                                                                                                                                                                                                                                                                                                                                                                                                                                        |
| Comments               |                                |                                                                                                                                                                                                                                                                                                                                                                                                                                                                                                                                                                                                                                                             |
| Input                  | Data                           | /Users//OneDrive - /RCT<br>Study/Kids<br>RCT/Kids_RCT_final.sav                                                                                                                                                                                                                                                                                                                                                                                                                                                                                                                                                                                             |
|                        | Active Dataset                 | DataSet1                                                                                                                                                                                                                                                                                                                                                                                                                                                                                                                                                                                                                                                    |
|                        | Filter                         | Incident > 0 (FILTER)                                                                                                                                                                                                                                                                                                                                                                                                                                                                                                                                                                                                                                       |
|                        | Weight                         | <none>                                                                                                                                                                                                                                                                                                                                                                                                                                                                                                                                                                                                                                                      |
|                        | Split File                     | <none>                                                                                                                                                                                                                                                                                                                                                                                                                                                                                                                                                                                                                                                      |
|                        | N of Rows in Working Data File | 85                                                                                                                                                                                                                                                                                                                                                                                                                                                                                                                                                                                                                                                          |
| Missing Value Handling | Definition of Missing          | User-defined missing values for factor, subject and within-subject variables are treated as missing.                                                                                                                                                                                                                                                                                                                                                                                                                                                                                                                                                        |
|                        | Cases Used                     | Statistics are based on cases with valid data for all variables in the model.                                                                                                                                                                                                                                                                                                                                                                                                                                                                                                                                                                               |
| Weight Handling        |                                | not applicable                                                                                                                                                                                                                                                                                                                                                                                                                                                                                                                                                                                                                                              |
| Syntax                 |                                | GENLIN Severity<br>(ORDER=ASCENDING) BY<br>Intervention<br>(ORDER=ASCENDING)<br>/MODEL Intervention<br><br>DISTRIBUTION=MULTINOMIAL<br>LINK=CUMLOGIT<br>/CRITERIA<br>METHOD=FISHER(1) SCALE=1<br>MAXITERATIONS=100<br>MAXSTEPHALVING=5<br>PCONVERGE=1E-006(ABSOLUTE)<br>SINGULAR=1E-012<br>ANALYSISTYPE=3(WALD)<br>CILEVEL=95<br>LIKELIHOOD=FULL<br>/REPEATED SUBJECT=Team<br>WITHINSUBJECT=Player<br>SORT=YES<br>CORRTYPE=INDEPENDENT<br>ADJUSTCORR=YES<br>COVB=ROBUST<br>MAXITERATIONS=100<br>PCONVERGE=1e-006(ABSOLUTE)<br>UPDATECORR=1<br>/MISSING<br>CLASSMISSING=EXCLUDE<br>/PRINT CPS DESCRIPTIVES<br>MODELINFO SUMMARY<br>SOLUTION (EXPONENTIATED). |
| Resources              | Processor Time                 | 00:00:00.08                                                                                                                                                                                                                                                                                                                                                                                                                                                                                                                                                                                                                                                 |
|                        | Elapsed Time                   | 00:00:00.00                                                                                                                                                                                                                                                                                                                                                                                                                                                                                                                                                                                                                                                 |

**Model Information**

|                                      |   |                       |
|--------------------------------------|---|-----------------------|
| Dependent Variable                   |   | Severity <sup>a</sup> |
| Probability Distribution             |   | Multinomial           |
| Link Function                        |   | Cumulative logit      |
| Subject Effect                       | 1 | Team                  |
| Within-Subject Effect                | 1 | Player                |
| Working Correlation Matrix Structure |   | Independent           |

a. The procedure applies the cumulative link function to the dependent variable values in ascending order.

**Case Processing Summary**

|          | N  | Percent |
|----------|----|---------|
| Included | 79 | 92.9%   |
| Excluded | 6  | 7.1%    |
| Total    | 85 | 100.0%  |

**Correlated Data Summary**

|                                    |                       |        |    |
|------------------------------------|-----------------------|--------|----|
| Number of Levels                   | Subject Effect        | Team   | 6  |
|                                    | Within-Subject Effect | Player | 79 |
| Number of Subjects                 |                       |        | 6  |
| Number of Measurements per Subject | Minimum               |        | 9  |
|                                    | Maximum               |        | 17 |
| Correlation Matrix Dimension       |                       |        | 79 |

**Categorical Variable Information**

| Dependent Variable | Severity     |                     | N  | Percent |
|--------------------|--------------|---------------------|----|---------|
|                    |              | 1 to 7 days missed  | 38 | 48.1%   |
|                    |              | 8 to 21 days missed | 32 | 40.5%   |
|                    |              | > 21 days missed    | 9  | 11.4%   |
|                    |              | Total               | 79 | 100.0%  |
| Factor             | Intervention | Control             | 42 | 53.2%   |
|                    |              | Intervention        | 37 | 46.8%   |
|                    |              | Total               | 79 | 100.0%  |

**Tests of Model Effects**

| Source       | Wald Chi-Square | Type III df | Sig. |
|--------------|-----------------|-------------|------|
| Intervention | .001            | 1           | .974 |

Dependent Variable: Severity  
Model: (Threshold), Intervention

**Parameter Estimates**

| Parameter              | B              | Std. Error | 95% Wald Confidence Interval |       | Hypothesis Test |    |      |
|------------------------|----------------|------------|------------------------------|-------|-----------------|----|------|
|                        |                |            | Lower                        | Upper | Wald Chi-Square | df | Sig. |
| Threshold [Severity=1] | -.083          | .4090      | -.885                        | .718  | .041            | 1  | .839 |
| [Severity=2]           | 2.044          | .3736      | 1.312                        | 2.776 | 29.933          | 1  | .000 |
| [Intervention=0]       | -.014          | .4343      | -.865                        | .837  | .001            | 1  | .974 |
| [Intervention=1]       | 0 <sup>a</sup> | .          | .                            | .     | .               | .  | .    |
| (Scale)                | 1              |            |                              |       |                 |    |      |

**Parameter Estimates**

| Parameter              | Exp(B) | 95% Wald Confidence Interval for Exp(B) |        |
|------------------------|--------|-----------------------------------------|--------|
|                        |        | Lower                                   | Upper  |
| Threshold [Severity=1] | .920   | .413                                    | 2.051  |
| [Severity=2]           | 7.722  | 3.713                                   | 16.060 |

|                  |      |      |       |
|------------------|------|------|-------|
| [Intervention=0] | .986 | .421 | 2.310 |
| [Intervention=1] | 1    | .    | .     |
| (Scale)          |      |      |       |

Dependent Variable: Severity

Model: (Threshold), Intervention

a. Set to zero because this parameter is redundant.

\* Generalized Estimating Equations.

GENLIN Adhere (REFERENCE=FIRST) BY Intervention (ORDER=ASCENDING)

/MODEL Intervention INTERCEPT=YES

DISTRIBUTION=BINOMIAL LINK=LOGIT

/CRITERIA METHOD=FISHER(1) SCALE=1 MAXITERATIONS=100 MAXSTEPHALVING=5

PCONVERGE=1E-006(ABSOLUTE)

SINGULAR=1E-012 ANALYSISTYPE=3(WALD) CILEVEL=95 LIKELIHOOD=FULL

/EMMEANS TABLES=Intervention SCALE=ORIGINAL

/REPEATED SUBJECT=Team WITHINSUBJECT=Player SORT=YES CORRTYPE=INDEPENDENT ADJUSTCORR=YES

COVB=ROBUST MAXITERATIONS=100 PCONVERGE=1e-006(ABSOLUTE) UPDATECORR=1

/MISSING CLASSMISSING=EXCLUDE

/PRINT CPS DESCRIPTIVES MODELINFO FIT SUMMARY SOLUTION (EXPONENTIATED).

## Generalized Linear Models

|                        |                                | Notes                                                                                                |
|------------------------|--------------------------------|------------------------------------------------------------------------------------------------------|
| Output Created         |                                | 11-SEP-2020 03:10:08                                                                                 |
| Comments               |                                |                                                                                                      |
| Input                  | Data                           | /Users//OneDrive - /RCT<br>Study/Kids<br>RCT/Kids_RCT_final.sav                                      |
|                        | Active Dataset                 | DataSet1                                                                                             |
|                        | Filter                         | <none>                                                                                               |
|                        | Weight                         | <none>                                                                                               |
|                        | Split File                     | <none>                                                                                               |
|                        | N of Rows in Working Data File | 94                                                                                                   |
| Missing Value Handling | Definition of Missing          | User-defined missing values for factor, subject and within-subject variables are treated as missing. |
|                        | Cases Used                     | Statistics are based on cases with valid data for all variables in the model.                        |
| Weight Handling        |                                | not applicable                                                                                       |

|           |                                                                                                                                                                                                                                                                                                                                                                                                                                                                                                                                                                                                                                             |             |
|-----------|---------------------------------------------------------------------------------------------------------------------------------------------------------------------------------------------------------------------------------------------------------------------------------------------------------------------------------------------------------------------------------------------------------------------------------------------------------------------------------------------------------------------------------------------------------------------------------------------------------------------------------------------|-------------|
| Syntax    | <pre> GENLIN Adhere (REFERENCE=FIRST) BY Intervention (ORDER=ASCENDING)  /MODEL Intervention INTERCEPT=YES DISTRIBUTION=BINOMIAL LINK=LOGIT  /CRITERIA METHOD=FISHER(1) SCALE=1 MAXITERATIONS=100 MAXSTEPHALVING=5 PCONVERGE=1E-006(ABSOLUT E) SINGULAR=1E-012 ANALYSISTYPE=3(WALD) CILEVEL=95 LIKELIHOOD=FULL  /EMMEANS TABLES=Intervention SCALE=ORIGINAL  /REPEATED SUBJECT=Team WITHINSUBJECT=Player SORT=YES CORRTYPE=INDEPENDENT ADJUSTCORR=YES COVB=ROBUST MAXITERATIONS=100 PCONVERGE=1e-006(ABSOLUT E) UPDATECORR=1  /MISSING CLASSMISSING=EXCLUDE  /PRINT CPS DESCRIPTIVES MODELINFO FIT SUMMARY SOLUTION (EXPONENTIATED). </pre> |             |
| Resources | Processor Time                                                                                                                                                                                                                                                                                                                                                                                                                                                                                                                                                                                                                              | 00:00:00.06 |
|           | Elapsed Time                                                                                                                                                                                                                                                                                                                                                                                                                                                                                                                                                                                                                                | 00:00:00.00 |

### Model Information

|                                      |                     |
|--------------------------------------|---------------------|
| Dependent Variable                   | Adhere <sup>a</sup> |
| Probability Distribution             | Binomial            |
| Link Function                        | Logit               |
| Subject Effect                       | 1 Team              |
| Within-Subject Effect                | 1 Player            |
| Working Correlation Matrix Structure | Independent         |

a. The procedure models 1.00 as the response, treating .00 as the reference category.

### Case Processing Summary

|          | N  | Percent |
|----------|----|---------|
| Included | 94 | 100.0%  |
| Excluded | 0  | 0.0%    |
| Total    | 94 | 100.0%  |

### Correlated Data Summary

|                                    |                       |        |    |
|------------------------------------|-----------------------|--------|----|
| Number of Levels                   | Subject Effect        | Team   | 6  |
|                                    | Within-Subject Effect | Player | 94 |
| Number of Subjects                 |                       |        | 6  |
| Number of Measurements per Subject | Minimum               |        | 13 |
|                                    | Maximum               |        | 20 |
| Correlation Matrix Dimension       |                       |        | 94 |

### Categorical Variable Information

|                    |              |              | N  | Percent |
|--------------------|--------------|--------------|----|---------|
| Dependent Variable | Adhere       | .00          | 6  | 6.4%    |
|                    |              | 1.00         | 88 | 93.6%   |
|                    |              | Total        | 94 | 100.0%  |
| Factor             | Intervention | Control      | 47 | 50.0%   |
|                    |              | Intervention | 47 | 50.0%   |
|                    |              | Total        | 94 | 100.0%  |

### Goodness of Fit<sup>a</sup>

|                                                                                   | Value  |
|-----------------------------------------------------------------------------------|--------|
| Quasi Likelihood under Independence Model Criterion (QIC) <sup>b</sup>            | 47.116 |
| Corrected Quasi Likelihood under Independence Model Criterion (QICC) <sup>b</sup> | 47.902 |

Dependent Variable: Adhere

Model: (Intercept), Intervention<sup>a</sup>

a. Information criteria are in smaller-is-better form.

b. Computed using the full log quasi-likelihood function.

### Tests of Model Effects

| Source       | Wald Chi-Square | Type III df | Sig. |
|--------------|-----------------|-------------|------|
| (Intercept)  | 126.299         | 1           | .000 |
| Intervention | .607            | 1           | .436 |

Dependent Variable: Adhere

Model: (Intercept), Intervention

### Parameter Estimates

| Parameter        | B              | Std. Error | 95% Wald Confidence Interval |       | Hypothesis Test |    |      | Exp(B) |
|------------------|----------------|------------|------------------------------|-------|-----------------|----|------|--------|
|                  |                |            | Lower                        | Upper | Wald Chi-Square | df | Sig. |        |
| (Intercept)      | 3.114          | .5209      | 2.093                        | 4.135 | 35.724          | 1  | .000 | 22.500 |
| [Intervention=0] | -.739          | .9479      | -2.596                       | 1.119 | .607            | 1  | .436 | .478   |
| [Intervention=1] | 0 <sup>a</sup> | .          | .                            | .     | .               | .  | .    | 1      |
| (Scale)          | 1              |            |                              |       |                 |    |      |        |

### Parameter Estimates

| Parameter        | 95% Wald Confidence Interval for Exp(B) |        |
|------------------|-----------------------------------------|--------|
|                  | Lower                                   | Upper  |
| (Intercept)      | 8.105                                   | 62.458 |
| [Intervention=0] | .075                                    | 3.062  |
| [Intervention=1] | .                                       | .      |
| (Scale)          |                                         |        |

Dependent Variable: Adhere

Model: (Intercept), Intervention

a. Set to zero because this parameter is redundant.

### Estimated Marginal Means: Intervention

| Intervention | Mean | Std. Error | Estimates                          |       |
|--------------|------|------------|------------------------------------|-------|
|              |      |            | 95% Wald Confidence Interval Lower | Upper |
|              |      |            |                                    |       |

|              |     |      |     |     |
|--------------|-----|------|-----|-----|
| Control      | .91 | .042 | .79 | .97 |
| Intervention | .96 | .021 | .89 | .98 |

\* Generalized Estimating Equations.

GENLIN Incident (REFERENCE=FIRST) BY Intervention Age\_category (ORDER=ASCENDING)

/MODEL Intervention Age\_category Intervention\*Age\_category INTERCEPT=YES

DISTRIBUTION=BINOMIAL LINK=LOGIT

/CRITERIA METHOD=FISHER(1) SCALE=1 MAXITERATIONS=100 MAXSTEPHALVING=5

PCONVERGE=1E-006(ABSOLUTE)

SINGULAR=1E-012 ANALYSISTYPE=3(WALD) CILEVEL=95 LIKELIHOOD=FULL

/EMMEANS TABLES=Intervention\*Age\_category SCALE=ORIGINAL

/REPEATED SUBJECT=Team WITHINSUBJECT=Player SORT=YES CORRTYPE=UNSTRUCTURED ADJUSTCORR=YES

COVB=ROBUST MAXITERATIONS=100 PCONVERGE=1e-006(ABSOLUTE) UPDATECORR=1

/MISSING CLASSMISSING=EXCLUDE

/PRINT CPS DESCRIPTIVES MODELINFO FIT SUMMARY SOLUTION (EXPONENTIATED).

## Generalized Linear Models

|                        |                                | Notes                                                                                                |
|------------------------|--------------------------------|------------------------------------------------------------------------------------------------------|
| Output Created         |                                | 13-SEP-2020 12:59:00                                                                                 |
| Comments               |                                |                                                                                                      |
| Input                  | Data                           | /Users//OneDrive - /RCT<br>Study/Kids<br>RCT/Kids_RCT_final.sav                                      |
|                        | Active Dataset                 | DataSet1                                                                                             |
|                        | Filter                         | <none>                                                                                               |
|                        | Weight                         | <none>                                                                                               |
|                        | Split File                     | <none>                                                                                               |
|                        | N of Rows in Working Data File | 94                                                                                                   |
| Missing Value Handling | Definition of Missing          | User-defined missing values for factor, subject and within-subject variables are treated as missing. |
|                        | Cases Used                     | Statistics are based on cases with valid data for all variables in the model.                        |
| Weight Handling        |                                | not applicable                                                                                       |

|           |                                                                                                                                                                                                                                                                                                                                                                                                                                                                                                                                                                                                                                                                                                                              |             |
|-----------|------------------------------------------------------------------------------------------------------------------------------------------------------------------------------------------------------------------------------------------------------------------------------------------------------------------------------------------------------------------------------------------------------------------------------------------------------------------------------------------------------------------------------------------------------------------------------------------------------------------------------------------------------------------------------------------------------------------------------|-------------|
| Syntax    | <pre> GENLIN Incident (REFERENCE=FIRST) BY Intervention Age_category (ORDER=ASCENDING)   /MODEL Intervention Age_category Intervention*Age_category INTERCEPT=YES   DISTRIBUTION=BINOMIAL LINK=LOGIT   /CRITERIA METHOD=FISHER(1) SCALE=1 MAXITERATIONS=100 MAXSTEPHALVING=5 PCONVERGE=1E-006(ABSOLUT E)   SINGULAR=1E-012 ANALYSISTYPE=3(WALD) CILEVEL=95 LIKELIHOOD=FULL   /EMMEANS TABLES=Intervention*Age_catego ry SCALE=ORIGINAL   /REPEATED SUBJECT=Team WITHINSUBJECT=Player SORT=YES CORRTYPE=UNSTRUCTURED ADJUSTCORR=YES   COVB=ROBUST MAXITERATIONS=100 PCONVERGE=1e-006(ABSOLUT E) UPDATECORR=1   /MISSING CLASSMISSING=EXCLUDE   /PRINT CPS DESCRIPTIVES MODELINFO FIT SUMMARY SOLUTION (EXPONENTIATED). </pre> |             |
| Resources | Processor Time                                                                                                                                                                                                                                                                                                                                                                                                                                                                                                                                                                                                                                                                                                               | 00:00:00.50 |
|           | Elapsed Time                                                                                                                                                                                                                                                                                                                                                                                                                                                                                                                                                                                                                                                                                                                 | 00:00:00.00 |

[DataSet1] /Users//OneDrive - /RCT Study/Kids RCT/Kids\_RCT\_final.sav

#### Model Information

|                                      |                       |
|--------------------------------------|-----------------------|
| Dependent Variable                   | Incident <sup>a</sup> |
| Probability Distribution             | Binomial              |
| Link Function                        | Logit                 |
| Subject Effect                       | 1                     |
| Within-Subject Effect                | 1                     |
| Working Correlation Matrix Structure | Unstructured          |

a. The procedure models 1 as the response, treating 0 as the reference category.

#### Case Processing Summary

|          | N  | Percent |
|----------|----|---------|
| Included | 94 | 100.0%  |
| Excluded | 0  | 0.0%    |
| Total    | 94 | 100.0%  |

#### Correlated Data Summary

|                  |                       |        |    |
|------------------|-----------------------|--------|----|
| Number of Levels | Subject Effect        | Team   | 6  |
|                  | Within-Subject Effect | Player | 94 |



|                                    |         |    |
|------------------------------------|---------|----|
| Number of Subjects                 |         | 6  |
| Number of Measurements per Subject | Minimum | 13 |
|                                    | Maximum | 20 |
| Correlation Matrix Dimension       |         | 94 |

### Categorical Variable Information

| Dependent Variable | Incident     |              | N  | Percent |
|--------------------|--------------|--------------|----|---------|
|                    |              | 0            | 9  | 9.6%    |
|                    |              | 1            | 85 | 90.4%   |
|                    |              | Total        | 94 | 100.0%  |
| Factor             | Intervention | Control      | 47 | 50.0%   |
|                    |              | Intervention | 47 | 50.0%   |
|                    |              | Total        | 94 | 100.0%  |
|                    | Age_category | 8 - 9        | 26 | 27.7%   |
|                    |              | 10 - 11      | 31 | 33.0%   |
|                    |              | 12 - 13      | 37 | 39.4%   |
|                    |              | Total        | 94 | 100.0%  |

### Goodness of Fit<sup>a</sup>

|                                                                                   | Value   |
|-----------------------------------------------------------------------------------|---------|
| Quasi Likelihood under Independence Model Criterion (QIC) <sup>b</sup>            | 129.299 |
| Corrected Quasi Likelihood under Independence Model Criterion (QICC) <sup>b</sup> | 141.299 |

Dependent Variable: Incident

Model: (Intercept), Intervention, Age\_category,

Intervention \* Age\_category<sup>a</sup>

a. Information criteria are in smaller-is-better form.

b. Computed using the full log quasi-likelihood function.

### Tests of Model Effects

| Source                      | Wald Chi-Square | Type III df | Sig. |
|-----------------------------|-----------------|-------------|------|
| (Intercept)                 | 19.083          | 1           | .000 |
| Intervention                | 142.738         | 1           | .000 |
| Age_category                | 5.854           | 2           | .054 |
| Intervention * Age_category | 39.163          | 2           | .000 |

Dependent Variable: Incident

Model: (Intercept), Intervention, Age\_category, Intervention \* Age\_category

### Parameter Estimates

| Parameter                           | B              | Std. Error | 95% Wald Confidence Interval |       | Hypothesis Test |    |      |
|-------------------------------------|----------------|------------|------------------------------|-------|-----------------|----|------|
|                                     |                |            | Lower                        | Upper | Wald Chi-Square | df | Sig. |
| (Intercept)                         | .005           | .0002      | .004                         | .005  | 515.736         | 1  | .000 |
| [Intervention=0]                    | .002           | .0010      | .000                         | .004  | 2.651           | 1  | .104 |
| [Intervention=1]                    | 0 <sup>a</sup> | .          | .                            | .     | .               | .  | .    |
| [Age_category=1]                    | -.001          | .0025      | -.006                        | .004  | .186            | 1  | .666 |
| [Age_category=2]                    | .015           | .0076      | .000                         | .030  | 3.965           | 1  | .046 |
| [Age_category=3]                    | 0 <sup>a</sup> | .          | .                            | .     | .               | .  | .    |
| [Intervention=0] * [Age_category=1] | .004           | .0011      | .002                         | .006  | 12.335          | 1  | .000 |
| [Intervention=0] * [Age_category=2] | .008           | .0013      | .006                         | .011  | 38.486          | 1  | .000 |
| [Intervention=0] * [Age_category=3] | 0 <sup>a</sup> | .          | .                            | .     | .               | .  | .    |

|                                     |                |   |   |   |   |   |
|-------------------------------------|----------------|---|---|---|---|---|
| [Intervention=1] * [Age_category=1] | 0 <sup>a</sup> | . | . | . | . | . |
| [Intervention=1] * [Age_category=2] | 0 <sup>a</sup> | . | . | . | . | . |
| [Intervention=1] * [Age_category=3] | 0 <sup>a</sup> | . | . | . | . | . |
| (Scale)                             | 1              |   |   |   |   |   |

**Parameter Estimates**

| Parameter                           | Exp(B) | 95% Wald Confidence Interval for Exp(B) |       |
|-------------------------------------|--------|-----------------------------------------|-------|
|                                     |        | Lower                                   | Upper |
| (Intercept)                         | 1.005  | 1.004                                   | 1.005 |
| [Intervention=0]                    | 1.002  | 1.000                                   | 1.004 |
| [Intervention=1]                    | 1      | .                                       | .     |
| [Age_category=1]                    | .999   | .994                                    | 1.004 |
| [Age_category=2]                    | 1.015  | 1.000                                   | 1.030 |
| [Age_category=3]                    | 1      | .                                       | .     |
| [Intervention=0] * [Age_category=1] | 1.004  | 1.002                                   | 1.006 |
| [Intervention=0] * [Age_category=2] | 1.008  | 1.006                                   | 1.011 |
| [Intervention=0] * [Age_category=3] | 1      | .                                       | .     |
| [Intervention=1] * [Age_category=1] | 1      | .                                       | .     |
| [Intervention=1] * [Age_category=2] | 1      | .                                       | .     |
| [Intervention=1] * [Age_category=3] | 1      | .                                       | .     |
| (Scale)                             |        |                                         |       |

Dependent Variable: Incident

Model: (Intercept), Intervention, Age\_category, Intervention \* Age\_category

a. Set to zero because this parameter is redundant.

**Estimated Marginal Means: Intervention\* Age\_category**

| Intervention | Age_category | Estimates |            | 95% Wald Confidence Interval |       |
|--------------|--------------|-----------|------------|------------------------------|-------|
|              |              | Mean      | Std. Error | Lower                        | Upper |
| Control      | 8 - 9        | .50       | .001       | .50                          | .50   |
|              | 10 - 11      | .51       | .002       | .50                          | .51   |
|              | 12 - 13      | .50       | .000       | .50                          | .50   |
| Intervention | 8 - 9        | .50       | .001       | .50                          | .50   |
|              | 10 - 11      | .50       | .002       | .50                          | .51   |
|              | 12 - 13      | .50       | .000       | .50                          | .50   |

\* Generalized Estimating Equations.  
 GENLIN Initial BY Intervention (ORDER=ASCENDING)  
 /MODEL Intervention INTERCEPT=YES  
 DISTRIBUTION=POISSON LINK=LOG  
 /CRITERIA METHOD=FISHER(1) SCALE=1 MAXITERATIONS=100 MAXSTEPHALVING=5  
 PCONVERGE=1E-006(ABSOLUTE)  
 SINGULAR=1E-012 ANALYSISTYPE=3(WALD) CILEVEL=95 LIKELIHOOD=FULL  
 /EMMEANS TABLES=Intervention SCALE=ORIGINAL  
 /REPEATED SUBJECT=Team WITHINSUBJECT=Player SORT=YES CORRTYPE=INDEPENDENT ADJUSTCORR=YES  
 COVB=ROBUST MAXITERATIONS=100 PCONVERGE=1e-006(ABSOLUTE) UPDATECORR=1  
 /MISSING CLASSMISSING=EXCLUDE  
 /PRINT CPS DESCRIPTIVES MODELINFO FIT SUMMARY SOLUTION (EXPONENTIATED).

## Generalized Linear Models

|                        |                                | Notes                                                                                                |
|------------------------|--------------------------------|------------------------------------------------------------------------------------------------------|
| Output Created         |                                | 23-OCT-2020 20:55:47                                                                                 |
| Comments               |                                |                                                                                                      |
| Input                  | Data                           | /Users//OneDrive - /RCT<br>Study/Kids<br>RCT/Kids_RCT_final.sav                                      |
|                        | Active Dataset                 | DataSet1                                                                                             |
|                        | Filter                         | <none>                                                                                               |
|                        | Weight                         | <none>                                                                                               |
|                        | Split File                     | <none>                                                                                               |
|                        | N of Rows in Working Data File | 94                                                                                                   |
| Missing Value Handling | Definition of Missing          | User-defined missing values for factor, subject and within-subject variables are treated as missing. |
|                        | Cases Used                     | Statistics are based on cases with valid data for all variables in the model.                        |
| Weight Handling        |                                | not applicable                                                                                       |

|           |                                                                                                                                                                                                                                                                                                                                                                                                                                                                                                                                                                                                                                                                                                 |             |
|-----------|-------------------------------------------------------------------------------------------------------------------------------------------------------------------------------------------------------------------------------------------------------------------------------------------------------------------------------------------------------------------------------------------------------------------------------------------------------------------------------------------------------------------------------------------------------------------------------------------------------------------------------------------------------------------------------------------------|-------------|
| Syntax    | GENLIN Initial BY Intervention<br>(ORDER=ASCENDING)<br>/MODEL Intervention<br>INTERCEPT=YES<br>DISTRIBUTION=POISSON<br>LINK=LOG<br>/CRITERIA<br>METHOD=FISHER(1) SCALE=1<br>MAXITERATIONS=100<br>MAXSTEPHALVING=5<br>PCONVERGE=1E-006(ABSOLUTE)<br>SINGULAR=1E-012<br>ANALYSISTYPE=3(WALD)<br>CILEVEL=95<br>LIKELIHOOD=FULL<br>/EMMEANS<br>TABLES=Intervention<br>SCALE=ORIGINAL<br>/REPEATED SUBJECT=Team<br>WITHINSUBJECT=Player<br>SORT=YES<br>CORRTYPE=INDEPENDENT<br>ADJUSTCORR=YES<br>COVB=ROBUST<br>MAXITERATIONS=100<br>PCONVERGE=1e-006(ABSOLUTE)<br>UPDATECORR=1<br>/MISSING<br>CLASSMISSING=EXCLUDE<br>/PRINT CPS DESCRIPTIVES<br>MODELINFO FIT SUMMARY<br>SOLUTION (EXPONENTIATED). |             |
| Resources | Processor Time                                                                                                                                                                                                                                                                                                                                                                                                                                                                                                                                                                                                                                                                                  | 00:00:00.06 |
|           | Elapsed Time                                                                                                                                                                                                                                                                                                                                                                                                                                                                                                                                                                                                                                                                                    | 00:00:01.00 |

### Model Information

|                                      |   |             |
|--------------------------------------|---|-------------|
| Dependent Variable                   |   | Initial     |
| Probability Distribution             |   | Poisson     |
| Link Function                        |   | Log         |
| Subject Effect                       | 1 | Team        |
| Within-Subject Effect                | 1 | Player      |
| Working Correlation Matrix Structure |   | Independent |

### Case Processing Summary

|          | N  | Percent |
|----------|----|---------|
| Included | 94 | 100.0%  |
| Excluded | 0  | 0.0%    |
| Total    | 94 | 100.0%  |

### Correlated Data Summary

|                                    |                       |        |    |
|------------------------------------|-----------------------|--------|----|
| Number of Levels                   | Subject Effect        | Team   | 6  |
|                                    | Within-Subject Effect | Player | 94 |
| Number of Subjects                 |                       |        | 6  |
| Number of Measurements per Subject | Minimum               |        | 13 |
|                                    | Maximum               |        | 20 |
| Correlation Matrix Dimension       |                       |        | 94 |

### Categorical Variable Information

| Factor | Intervention |  | N  | Percent |
|--------|--------------|--|----|---------|
|        | Control      |  | 47 | 50.0%   |
|        | Intervention |  | 47 | 50.0%   |

|       |    |        |
|-------|----|--------|
| Total | 94 | 100.0% |
|-------|----|--------|

### Continuous Variable Information

| Dependent Variable | Initial | N  | Minimum | Maximum | Mean | Std. Deviation |
|--------------------|---------|----|---------|---------|------|----------------|
|                    |         | 94 | 0       | 4       | 1.40 | .896           |

### Goodness of Fit<sup>a</sup>

|                                                                                   | Value  |
|-----------------------------------------------------------------------------------|--------|
| Quasi Likelihood under Independence Model Criterion (QIC) <sup>b</sup>            | 45.401 |
| Corrected Quasi Likelihood under Independence Model Criterion (QICC) <sup>b</sup> | 48.819 |

Dependent Variable: Initial

Model: (Intercept), Intervention<sup>a</sup>

a. Information criteria are in smaller-is-better form.

b. Computed using the full log quasi-likelihood function.

### Tests of Model Effects

| Source       | Wald Chi-Square | Type III df | Sig. |
|--------------|-----------------|-------------|------|
| (Intercept)  | 61.808          | 1           | .000 |
| Intervention | 74.930          | 1           | .000 |

Dependent Variable: Initial

Model: (Intercept), Intervention

### Parameter Estimates

| Parameter        | B              | Std. Error | 95% Wald Confidence Interval |       | Hypothesis Test |    |      | Exp(B) |
|------------------|----------------|------------|------------------------------|-------|-----------------|----|------|--------|
|                  |                |            | Lower                        | Upper | Wald Chi-Square | df | Sig. |        |
| (Intercept)      | -.089          | .0724      | -.231                        | .053  | 1.511           | 1  | .219 | .915   |
| [Intervention=0] | .727           | .0840      | .563                         | .892  | 74.930          | 1  | .000 | 2.070  |
| [Intervention=1] | 0 <sup>a</sup> | .          | .                            | .     | .               | .  | .    | 1      |
| (Scale)          | 1              |            |                              |       |                 |    |      |        |

### Parameter Estimates

| Parameter        | 95% Wald Confidence Interval for Exp(B) |       |
|------------------|-----------------------------------------|-------|
|                  | Lower                                   | Upper |
| (Intercept)      | .794                                    | 1.054 |
| [Intervention=0] | 1.755                                   | 2.440 |
| [Intervention=1] | .                                       | .     |
| (Scale)          |                                         |       |

Dependent Variable: Initial

Model: (Intercept), Intervention

a. Set to zero because this parameter is redundant.

### Estimated Marginal Means: Intervention

| Intervention | Mean | Std. Error | Estimates                          |       |
|--------------|------|------------|------------------------------------|-------|
|              |      |            | 95% Wald Confidence Interval Lower | Upper |
| Control      | 1.89 | .051       | 1.80                               | 2.00  |
| Intervention | .91  | .066       | .79                                | 1.05  |

\* Generalized Estimating Equations.  
 GENLIN Recurrent BY Intervention (ORDER=ASCENDING)  
 /MODEL Intervention INTERCEPT=YES  
 DISTRIBUTION=POISSON LINK=LOG  
 /CRITERIA METHOD=FISHER(1) SCALE=1 MAXITERATIONS=100 MAXSTEPHALVING=5  
 PCONVERGE=1E-006(ABSOLUTE)  
 SINGULAR=1E-012 ANALYSISTYPE=3(WALD) CILEVEL=95 LIKELIHOOD=FULL  
 /EMMEANS TABLES=Intervention SCALE=ORIGINAL  
 /REPEATED SUBJECT=Team WITHINSUBJECT=Player SORT=YES CORRTYPE=INDEPENDENT ADJUSTCORR=YES  
 COVB=ROBUST MAXITERATIONS=100 PCONVERGE=1e-006(ABSOLUTE) UPDATECORR=1  
 /MISSING CLASSMISSING=EXCLUDE  
 /PRINT CPS DESCRIPTIVES MODELINFO SUMMARY SOLUTION (EXPONENTIATED).

## Generalized Linear Models

| <b>Notes</b>           |                                | 23-OCT-2020 20:56:15                                                                                 |
|------------------------|--------------------------------|------------------------------------------------------------------------------------------------------|
| Output Created         |                                |                                                                                                      |
| Comments               |                                |                                                                                                      |
| Input                  | Data                           | /Users//OneDrive - /RCT<br>Study/Kids<br>RCT/Kids_RCT_final.sav                                      |
|                        | Active Dataset                 | DataSet1                                                                                             |
|                        | Filter                         | <none>                                                                                               |
|                        | Weight                         | <none>                                                                                               |
|                        | Split File                     | <none>                                                                                               |
|                        | N of Rows in Working Data File | 94                                                                                                   |
| Missing Value Handling | Definition of Missing          | User-defined missing values for factor, subject and within-subject variables are treated as missing. |
|                        | Cases Used                     | Statistics are based on cases with valid data for all variables in the model.                        |
| Weight Handling        | not applicable                 |                                                                                                      |

|           |                                                                                                                                                                                                                                                                                                                                                                                                                                                                                                                                                                                                                               |             |
|-----------|-------------------------------------------------------------------------------------------------------------------------------------------------------------------------------------------------------------------------------------------------------------------------------------------------------------------------------------------------------------------------------------------------------------------------------------------------------------------------------------------------------------------------------------------------------------------------------------------------------------------------------|-------------|
| Syntax    | <pre> GENLIN Recurrent BY Intervention (ORDER=ASCENDING)   /MODEL Intervention INTERCEPT=YES DISTRIBUTION=POISSON LINK=LOG   /CRITERIA METHOD=FISHER(1) SCALE=1 MAXITERATIONS=100 MAXSTEPHALVING=5 PCONVERGE=1E-006(ABSOLUTE)   SINGULAR=1E-012 ANALYSISTYPE=3(WALD) CILEVEL=95 LIKELIHOOD=FULL   /EMMEANS TABLES=Intervention SCALE=ORIGINAL   /REPEATED SUBJECT=Team WITHINSUBJECT=Player SORT=YES CORRTYPE=INDEPENDENT ADJUSTCORR=YES   COVB=ROBUST MAXITERATIONS=100 PCONVERGE=1e-006(ABSOLUTE) UPDATECORR=1   /MISSING CLASSMISSING=EXCLUDE   /PRINT CPS DESCRIPTIVES MODELINFO SUMMARY SOLUTION (EXPONENTIATED). </pre> |             |
| Resources | Processor Time                                                                                                                                                                                                                                                                                                                                                                                                                                                                                                                                                                                                                | 00:00:00.09 |
|           | Elapsed Time                                                                                                                                                                                                                                                                                                                                                                                                                                                                                                                                                                                                                  | 00:00:00.00 |

### Model Information

|                                      |   |             |
|--------------------------------------|---|-------------|
| Dependent Variable                   |   | Recurrent   |
| Probability Distribution             |   | Poisson     |
| Link Function                        |   | Log         |
| Subject Effect                       | 1 | Team        |
| Within-Subject Effect                | 1 | Player      |
| Working Correlation Matrix Structure |   | Independent |

### Case Processing Summary

|          | N  | Percent |
|----------|----|---------|
| Included | 94 | 100.0%  |
| Excluded | 0  | 0.0%    |
| Total    | 94 | 100.0%  |

### Correlated Data Summary

|                                    |                       |        |    |
|------------------------------------|-----------------------|--------|----|
| Number of Levels                   | Subject Effect        | Team   | 6  |
|                                    | Within-Subject Effect | Player | 94 |
| Number of Subjects                 |                       |        | 6  |
| Number of Measurements per Subject | Minimum               |        | 13 |
|                                    | Maximum               |        | 20 |
| Correlation Matrix Dimension       |                       |        | 94 |

### Categorical Variable Information

| Factor | Intervention |  | N  | Percent |
|--------|--------------|--|----|---------|
|        | Control      |  | 47 | 50.0%   |
|        | Intervention |  | 47 | 50.0%   |

|       |    |        |
|-------|----|--------|
| Total | 94 | 100.0% |
|-------|----|--------|

**Continuous Variable Information**

| Dependent Variable | Recurrent | N  | Minimum | Maximum | Mean | Std. Deviation |
|--------------------|-----------|----|---------|---------|------|----------------|
|                    |           | 94 | 0       | 1       | .07  | .264           |

**Tests of Model Effects**

| Source       | Wald Chi-Square | Type III df | Sig. |
|--------------|-----------------|-------------|------|
| (Intercept)  | 26.248          | 1           | .000 |
| Intervention | .410            | 1           | .522 |

Dependent Variable: Recurrent  
Model: (Intercept), Intervention

**Parameter Estimates**

| Parameter        | B              | Std. Error | 95% Wald Confidence Interval |        | Hypothesis Test |    |      | Exp(B) |
|------------------|----------------|------------|------------------------------|--------|-----------------|----|------|--------|
|                  |                |            | Lower                        | Upper  | Wald Chi-Square | df | Sig. |        |
| (Intercept)      | -3.157         | .9132      | -4.947                       | -1.367 | 11.952          | 1  | .001 | .043   |
| [Intervention=0] | .916           | 1.4317     | -1.890                       | 3.722  | .410            | 1  | .522 | 2.500  |
| [Intervention=1] | 0 <sup>a</sup> | .          | .                            | .      | .               | .  | .    | 1      |
| (Scale)          | 1              |            |                              |        |                 |    |      |        |

**Parameter Estimates**

| Parameter        | 95% Wald Confidence Interval for Exp(B) |        |
|------------------|-----------------------------------------|--------|
|                  | Lower                                   | Upper  |
| (Intercept)      |                                         | .255   |
| [Intervention=0] |                                         | 41.363 |
| [Intervention=1] |                                         | .      |
| (Scale)          |                                         |        |

Dependent Variable: Recurrent  
Model: (Intercept), Intervention

a. Set to zero because this parameter is redundant.

**Estimated Marginal Means: Intervention**

| Intervention | Mean | Std. Error | 95% Wald Confidence Interval |       |
|--------------|------|------------|------------------------------|-------|
|              |      |            | Lower                        | Upper |
| Control      | .11  | .092       | .02                          | .58   |
| Intervention | .04  | .039       | .01                          | .25   |

\* Generalized Estimating Equations.

GENLIN Contact BY Intervention (ORDER=ASCENDING)

/MODEL Intervention INTERCEPT=YES

DISTRIBUTION=POISSON LINK=LOG

/CRITERIA METHOD=FISHER(1) SCALE=1 MAXITERATIONS=100 MAXSTEPHALVING=5

PCONVERGE=1E-006(ABSOLUTE)

SINGULAR=1E-012 ANALYSISTYPE=3(WALD) CILEVEL=95 LIKELIHOOD=FULL

/EMMEANS TABLES=Intervention SCALE=ORIGINAL

/REPEATED SUBJECT=Team WITHINSUBJECT=Player SORT=YES CORRTYPE=INDEPENDENT ADJUSTCORR=YES

COVB=ROBUST MAXITERATIONS=100 PCONVERGE=1e-006(ABSOLUTE) UPDATECORR=1

/MISSING CLASSMISSING=EXCLUDE

/PRINT CPS DESCRIPTIVES MODELINFO SUMMARY SOLUTION (EXPONENTIATED).



## Generalized Linear Models

| Notes                  |                                | 23-OCT-2020 20:57:13                                                                                                                                                                                                                                                                                                                                                                                                                                                                                                                                                                                                                                                                        |
|------------------------|--------------------------------|---------------------------------------------------------------------------------------------------------------------------------------------------------------------------------------------------------------------------------------------------------------------------------------------------------------------------------------------------------------------------------------------------------------------------------------------------------------------------------------------------------------------------------------------------------------------------------------------------------------------------------------------------------------------------------------------|
| Output Created         |                                |                                                                                                                                                                                                                                                                                                                                                                                                                                                                                                                                                                                                                                                                                             |
| Comments               |                                |                                                                                                                                                                                                                                                                                                                                                                                                                                                                                                                                                                                                                                                                                             |
| Input                  | Data                           | /Users//OneDrive - /RCT<br>Study/Kids<br>RCT/Kids_RCT_final.sav                                                                                                                                                                                                                                                                                                                                                                                                                                                                                                                                                                                                                             |
|                        | Active Dataset                 | DataSet1                                                                                                                                                                                                                                                                                                                                                                                                                                                                                                                                                                                                                                                                                    |
|                        | Filter                         | <none>                                                                                                                                                                                                                                                                                                                                                                                                                                                                                                                                                                                                                                                                                      |
|                        | Weight                         | <none>                                                                                                                                                                                                                                                                                                                                                                                                                                                                                                                                                                                                                                                                                      |
|                        | Split File                     | <none>                                                                                                                                                                                                                                                                                                                                                                                                                                                                                                                                                                                                                                                                                      |
|                        | N of Rows in Working Data File | 94                                                                                                                                                                                                                                                                                                                                                                                                                                                                                                                                                                                                                                                                                          |
| Missing Value Handling | Definition of Missing          | User-defined missing values for factor, subject and within-subject variables are treated as missing.                                                                                                                                                                                                                                                                                                                                                                                                                                                                                                                                                                                        |
|                        | Cases Used                     | Statistics are based on cases with valid data for all variables in the model.                                                                                                                                                                                                                                                                                                                                                                                                                                                                                                                                                                                                               |
| Weight Handling        |                                | not applicable                                                                                                                                                                                                                                                                                                                                                                                                                                                                                                                                                                                                                                                                              |
| Syntax                 |                                | GENLIN Contact BY Intervention<br>(ORDER=ASCENDING)<br>/MODEL Intervention<br>INTERCEPT=YES<br>DISTRIBUTION=POISSON<br>LINK=LOG<br>/CRITERIA<br>METHOD=FISHER(1) SCALE=1<br>MAXITERATIONS=100<br>MAXSTEPHALVING=5<br>PCONVERGE=1E-006(ABSOLUTE)<br>SINGULAR=1E-012<br>ANALYSISTYPE=3(WALD)<br>CILEVEL=95<br>LIKELIHOOD=FULL<br>/EMMEANS<br>TABLES=Intervention<br>SCALE=ORIGINAL<br>/REPEATED SUBJECT=Team<br>WITHINSUBJECT=Player<br>SORT=YES<br>CORRTYPE=INDEPENDENT<br>ADJUSTCORR=YES<br>COVB=ROBUST<br>MAXITERATIONS=100<br>PCONVERGE=1e-006(ABSOLUTE)<br>UPDATECORR=1<br>/MISSING<br>CLASSMISSING=EXCLUDE<br>/PRINT CPS DESCRIPTIVES<br>MODELINFO SUMMARY<br>SOLUTION (EXPONENTIATED). |
| Resources              | Processor Time                 | 00:00:00.09                                                                                                                                                                                                                                                                                                                                                                                                                                                                                                                                                                                                                                                                                 |
|                        | Elapsed Time                   | 00:00:00.00                                                                                                                                                                                                                                                                                                                                                                                                                                                                                                                                                                                                                                                                                 |

### Model Information

|                          |   |         |
|--------------------------|---|---------|
| Dependent Variable       |   | Contact |
| Probability Distribution |   | Poisson |
| Link Function            |   | Log     |
| Subject Effect           | 1 | Team    |
| Within-Subject Effect    | 1 | Player  |

**Case Processing Summary**

|          | N  | Percent |
|----------|----|---------|
| Included | 94 | 100.0%  |
| Excluded | 0  | 0.0%    |
| Total    | 94 | 100.0%  |

**Correlated Data Summary**

|                                    |                       |        |    |
|------------------------------------|-----------------------|--------|----|
| Number of Levels                   | Subject Effect        | Team   | 6  |
|                                    | Within-Subject Effect | Player | 94 |
| Number of Subjects                 |                       |        | 6  |
| Number of Measurements per Subject | Minimum               |        | 13 |
|                                    | Maximum               |        | 20 |
| Correlation Matrix Dimension       |                       |        | 94 |

**Categorical Variable Information**

| Factor | Intervention |  | N  | Percent |
|--------|--------------|--|----|---------|
|        | Control      |  | 47 | 50.0%   |
|        | Intervention |  | 47 | 50.0%   |
|        | Total        |  | 94 | 100.0%  |

**Continuous Variable Information**

| Dependent Variable | Contact | N  | Minimum | Maximum | Mean | Std. Deviation |
|--------------------|---------|----|---------|---------|------|----------------|
|                    |         | 94 | 0       | 3       | .78  | .750           |

**Tests of Model Effects**

| Source       | Wald Chi-Square | Type III df | Sig. |
|--------------|-----------------|-------------|------|
| (Intercept)  | 2.605           | 1           | .107 |
| Intervention | 31.125          | 1           | .000 |

Dependent Variable: Contact  
 Model: (Intercept), Intervention

**Parameter Estimates**

| Parameter        | B              | Std. Error | 95% Wald Confidence Interval |       | Hypothesis Test |    |      | Exp(B) |
|------------------|----------------|------------|------------------------------|-------|-----------------|----|------|--------|
|                  |                |            | Lower                        | Upper | Wald Chi-Square | df | Sig. |        |
| (Intercept)      | -.518          | .1753      | -.861                        | -.174 | 8.731           | 1  | .003 | .596   |
| [Intervention=0] | .474           | .0850      | .308                         | .641  | 31.125          | 1  | .000 | 1.607  |
| [Intervention=1] | 0 <sup>a</sup> | .          | .                            | .     | .               | .  | .    | 1      |
| (Scale)          | 1              |            |                              |       |                 |    |      |        |

**Parameter Estimates**

| Parameter        | 95% Wald Confidence Interval for Exp(B) |       |
|------------------|-----------------------------------------|-------|
|                  | Lower                                   | Upper |
| (Intercept)      | .423                                    | .840  |
| [Intervention=0] | 1.360                                   | 1.899 |
| [Intervention=1] | .                                       | .     |
| (Scale)          |                                         |       |

Dependent Variable: Contact  
 Model: (Intercept), Intervention  
 a. Set to zero because this parameter is redundant.

**Estimated Marginal Means: Intervention**

| Intervention | Estimates |            |                              |       |
|--------------|-----------|------------|------------------------------|-------|
|              | Mean      | Std. Error | 95% Wald Confidence Interval |       |
|              |           |            | Lower                        | Upper |
| Control      | .96       | .175       | .67                          | 1.37  |
| Intervention | .60       | .104       | .42                          | .84   |

\* Generalized Estimating Equations.

GENLIN Non\_contact BY Intervention (ORDER=ASCENDING)

/MODEL Intervention INTERCEPT=YES

DISTRIBUTION=POISSON LINK=LOG

/CRITERIA METHOD=FISHER(1) SCALE=1 MAXITERATIONS=100 MAXSTEPHALVING=5

PCONVERGE=1E-006(ABSOLUTE)

SINGULAR=1E-012 ANALYSISTYPE=3(WALD) CILEVEL=95 LIKELIHOOD=FULL

/EMMEANS TABLES=Intervention SCALE=ORIGINAL

/REPEATED SUBJECT=Team WITHINSUBJECT=Player SORT=YES CORRTYPE=INDEPENDENT ADJUSTCORR=YES

COVB=ROBUST MAXITERATIONS=100 PCONVERGE=1e-006(ABSOLUTE) UPDATECORR=1

/MISSING CLASSMISSING=EXCLUDE

/PRINT CPS DESCRIPTIVES MODELINFO SUMMARY SOLUTION (EXPONENTIATED).

## Generalized Linear Models

| Notes                  |                                |                                                                                                      |
|------------------------|--------------------------------|------------------------------------------------------------------------------------------------------|
| Output Created         |                                | 23-OCT-2020 20:57:32                                                                                 |
| Comments               |                                |                                                                                                      |
| Input                  | Data                           | /Users//OneDrive - /RCT<br>Study/Kids<br>RCT/Kids_RCT_final.sav                                      |
|                        | Active Dataset                 | DataSet1                                                                                             |
|                        | Filter                         | <none>                                                                                               |
|                        | Weight                         | <none>                                                                                               |
|                        | Split File                     | <none>                                                                                               |
|                        | N of Rows in Working Data File | 94                                                                                                   |
| Missing Value Handling | Definition of Missing          | User-defined missing values for factor, subject and within-subject variables are treated as missing. |
|                        | Cases Used                     | Statistics are based on cases with valid data for all variables in the model.                        |
| Weight Handling        |                                | not applicable                                                                                       |

|           |                                                                                                                                                                                                                                                                                                                                                                                                                                                                                                                                                                                                                                   |             |
|-----------|-----------------------------------------------------------------------------------------------------------------------------------------------------------------------------------------------------------------------------------------------------------------------------------------------------------------------------------------------------------------------------------------------------------------------------------------------------------------------------------------------------------------------------------------------------------------------------------------------------------------------------------|-------------|
| Syntax    | <pre> GENLIN Non_contact BY Intervention (ORDER=ASCENDING)   /MODEL Intervention INTERCEPT=YES DISTRIBUTION=POISSON LINK=LOG   /CRITERIA METHOD=FISHER(1) SCALE=1 MAXITERATIONS=100 MAXSTEPHALVING=5 PCONVERGE=1E-006(ABSOLUT E)   SINGULAR=1E-012 ANALYSISTYPE=3(WALD) CILEVEL=95 LIKELIHOOD=FULL   /EMMEANS TABLES=Intervention SCALE=ORIGINAL   /REPEATED SUBJECT=Team WITHINSUBJECT=Player SORT=YES CORRTYPE=INDEPENDENT ADJUSTCORR=YES   COVB=ROBUST MAXITERATIONS=100 PCONVERGE=1e-006(ABSOLUT E) UPDATECORR=1   /MISSING CLASSMISSING=EXCLUDE   /PRINT CPS DESCRIPTIVES MODELINFO SUMMARY SOLUTION (EXPONENTIATED). </pre> |             |
| Resources | Processor Time                                                                                                                                                                                                                                                                                                                                                                                                                                                                                                                                                                                                                    | 00:00:00.08 |
|           | Elapsed Time                                                                                                                                                                                                                                                                                                                                                                                                                                                                                                                                                                                                                      | 00:00:01.00 |

### Model Information

|                                      |             |        |
|--------------------------------------|-------------|--------|
| Dependent Variable                   | Non_contact |        |
| Probability Distribution             | Poisson     |        |
| Link Function                        | Log         |        |
| Subject Effect                       | 1           | Team   |
| Within-Subject Effect                | 1           | Player |
| Working Correlation Matrix Structure | Independent |        |

### Case Processing Summary

|          | N  | Percent |
|----------|----|---------|
| Included | 94 | 100.0%  |
| Excluded | 0  | 0.0%    |
| Total    | 94 | 100.0%  |

### Correlated Data Summary

|                                    |                       |        |    |
|------------------------------------|-----------------------|--------|----|
| Number of Levels                   | Subject Effect        | Team   | 6  |
|                                    | Within-Subject Effect | Player | 94 |
| Number of Subjects                 |                       |        | 6  |
| Number of Measurements per Subject | Minimum               | 13     |    |
|                                    | Maximum               | 20     |    |
| Correlation Matrix Dimension       |                       |        | 94 |

### Categorical Variable Information

| Factor       |         | N  | Percent |
|--------------|---------|----|---------|
| Intervention | Control | 47 | 50.0%   |

|  |              |    |        |
|--|--------------|----|--------|
|  | Intervention | 47 | 50.0%  |
|  | Total        | 94 | 100.0% |

**Continuous Variable Information**

| Dependent Variable | Non_contact | N  | Minimum | Maximum | Mean | Std. Deviation |
|--------------------|-------------|----|---------|---------|------|----------------|
|                    |             | 94 | 0       | 2       | .46  | .650           |

**Tests of Model Effects**

| Source       | Wald Chi-Square | Type III df | Sig. |
|--------------|-----------------|-------------|------|
| (Intercept)  | 12.254          | 1           | .000 |
| Intervention | 11.288          | 1           | .001 |

Dependent Variable: Non\_contact  
Model: (Intercept), Intervention

**Parameter Estimates**

| Parameter        | B              | Std. Error | 95% Wald Confidence Interval |       | Hypothesis Test |    |      | Exp(B) |
|------------------|----------------|------------|------------------------------|-------|-----------------|----|------|--------|
|                  |                |            | Lower                        | Upper | Wald Chi-Square | df | Sig. |        |
| (Intercept)      | -1.365         | .3328      | -2.018                       | -.713 | 16.829          | 1  | .000 | .255   |
| [Intervention=0] | .949           | .2825      | .395                         | 1.503 | 11.288          | 1  | .001 | 2.583  |
| [Intervention=1] | 0 <sup>a</sup> | .          | .                            | .     | .               | .  | .    | 1      |
| (Scale)          | 1              |            |                              |       |                 |    |      |        |

**Parameter Estimates**

| Parameter        | 95% Wald Confidence Interval for Exp(B) |       |
|------------------|-----------------------------------------|-------|
|                  | Lower                                   | Upper |
| (Intercept)      |                                         | .490  |
| [Intervention=0] |                                         | 4.494 |
| [Intervention=1] |                                         | .     |
| (Scale)          |                                         |       |

Dependent Variable: Non\_contact  
Model: (Intercept), Intervention

a. Set to zero because this parameter is redundant.

**Estimated Marginal Means: Intervention**

| Intervention | Mean | Std. Error | 95% Wald Confidence Interval |       |
|--------------|------|------------|------------------------------|-------|
|              |      |            | Lower                        | Upper |
| Control      | .66  | .160       | .41                          | 1.06  |
| Intervention | .26  | .085       | .13                          | .49   |

\* Generalized Estimating Equations.

GENLIN Overuse BY Intervention (ORDER=ASCENDING)

/MODEL Intervention INTERCEPT=YES

DISTRIBUTION=POISSON LINK=LOG

/CRITERIA METHOD=FISHER(1) SCALE=1 MAXITERATIONS=100 MAXSTEPHALVING=5

PCONVERGE=1E-006(Absolute)

SINGULAR=1E-012 ANALYSISTYPE=3(WALD) CILEVEL=95 LIKELIHOOD=FULL

/EMMEANS TABLES=Intervention SCALE=ORIGINAL

/REPEATED SUBJECT=Team WITHINSUBJECT=Player SORT=YES CORRTYPE=INDEPENDENT ADJUSTCORR=YES

COVB=ROBUST MAXITERATIONS=100 PCONVERGE=1e-006(Absolute) UPDATECORR=1

/MISSING CLASSMISSING=EXCLUDE

/PRINT CPS DESCRIPTIVES MODELINFO SUMMARY SOLUTION (EXPONENTIATED).

## Generalized Linear Models

| <b>Notes</b>           |                                | 23-OCT-2020 20:57:51                                                                                                                                                                                                                                                                                                                                                                                                                                                                                                                                                                                                                                                                     |
|------------------------|--------------------------------|------------------------------------------------------------------------------------------------------------------------------------------------------------------------------------------------------------------------------------------------------------------------------------------------------------------------------------------------------------------------------------------------------------------------------------------------------------------------------------------------------------------------------------------------------------------------------------------------------------------------------------------------------------------------------------------|
| Output Created         |                                |                                                                                                                                                                                                                                                                                                                                                                                                                                                                                                                                                                                                                                                                                          |
| Comments               |                                |                                                                                                                                                                                                                                                                                                                                                                                                                                                                                                                                                                                                                                                                                          |
| Input                  | Data                           | /Users//OneDrive - /RCT Study/Kids RCT/Kids_RCT_final.sav                                                                                                                                                                                                                                                                                                                                                                                                                                                                                                                                                                                                                                |
|                        | Active Dataset                 | DataSet1                                                                                                                                                                                                                                                                                                                                                                                                                                                                                                                                                                                                                                                                                 |
|                        | Filter                         | <none>                                                                                                                                                                                                                                                                                                                                                                                                                                                                                                                                                                                                                                                                                   |
|                        | Weight                         | <none>                                                                                                                                                                                                                                                                                                                                                                                                                                                                                                                                                                                                                                                                                   |
|                        | Split File                     | <none>                                                                                                                                                                                                                                                                                                                                                                                                                                                                                                                                                                                                                                                                                   |
|                        | N of Rows in Working Data File | 94                                                                                                                                                                                                                                                                                                                                                                                                                                                                                                                                                                                                                                                                                       |
| Missing Value Handling | Definition of Missing          | User-defined missing values for factor, subject and within-subject variables are treated as missing.                                                                                                                                                                                                                                                                                                                                                                                                                                                                                                                                                                                     |
|                        | Cases Used                     | Statistics are based on cases with valid data for all variables in the model.                                                                                                                                                                                                                                                                                                                                                                                                                                                                                                                                                                                                            |
| Weight Handling        |                                | not applicable                                                                                                                                                                                                                                                                                                                                                                                                                                                                                                                                                                                                                                                                           |
| Syntax                 |                                | GENLIN Overuse BY Intervention (ORDER=ASCENDING)<br>/MODEL Intervention<br>INTERCEPT=YES<br>DISTRIBUTION=POISSON<br>LINK=LOG<br>/CRITERIA<br>METHOD=FISHER(1) SCALE=1<br>MAXITERATIONS=100<br>MAXSTEPHALVING=5<br>PCONVERGE=1E-006(ABSOLUTE)<br>SINGULAR=1E-012<br>ANALYSISTYPE=3(WALD)<br>CILEVEL=95<br>LIKELIHOOD=FULL<br>/EMMEANS<br>TABLES=Intervention<br>SCALE=ORIGINAL<br>/REPEATED SUBJECT=Team<br>WITHINSUBJECT=Player<br>SORT=YES<br>CORRTYPE=INDEPENDENT<br>ADJUSTCORR=YES<br>COVB=ROBUST<br>MAXITERATIONS=100<br>PCONVERGE=1e-006(ABSOLUTE)<br>UPDATECORR=1<br>/MISSING<br>CLASSMISSING=EXCLUDE<br>/PRINT CPS DESCRIPTIVES<br>MODELINFO SUMMARY<br>SOLUTION (EXPONENTIATED). |
| Resources              | Processor Time                 | 00:00:00.08                                                                                                                                                                                                                                                                                                                                                                                                                                                                                                                                                                                                                                                                              |
|                        | Elapsed Time                   | 00:00:00.00                                                                                                                                                                                                                                                                                                                                                                                                                                                                                                                                                                                                                                                                              |

### Model Information

|                          |         |
|--------------------------|---------|
| Dependent Variable       | Overuse |
| Probability Distribution | Poisson |
| Link Function            | Log     |
| Subject Effect           | 1 Team  |

|                                      |   |             |
|--------------------------------------|---|-------------|
| Within-Subject Effect                | 1 | Player      |
| Working Correlation Matrix Structure |   | Independent |

### Case Processing Summary

|          | N  | Percent |
|----------|----|---------|
| Included | 94 | 100.0%  |
| Excluded | 0  | 0.0%    |
| Total    | 94 | 100.0%  |

### Correlated Data Summary

|                                    |                       |        |    |
|------------------------------------|-----------------------|--------|----|
| Number of Levels                   | Subject Effect        | Team   | 6  |
|                                    | Within-Subject Effect | Player | 94 |
| Number of Subjects                 |                       |        | 6  |
| Number of Measurements per Subject | Minimum               |        | 13 |
|                                    | Maximum               |        | 20 |
| Correlation Matrix Dimension       |                       |        | 94 |

### Categorical Variable Information

| Factor | Intervention |  | N  | Percent |
|--------|--------------|--|----|---------|
|        | Control      |  | 47 | 50.0%   |
|        | Intervention |  | 47 | 50.0%   |
|        | Total        |  | 94 | 100.0%  |

### Continuous Variable Information

| Dependent Variable | Overuse | N  | Minimum | Maximum | Mean | Std. Deviation |
|--------------------|---------|----|---------|---------|------|----------------|
|                    |         | 94 | 0       | 2       | .22  | .511           |

### Tests of Model Effects

| Source       | Wald Chi-Square | Type III df | Sig. |
|--------------|-----------------|-------------|------|
| (Intercept)  | 11.535          | 1           | .001 |
| Intervention | 14.668          | 1           | .000 |

Dependent Variable: Overuse  
Model: (Intercept), Intervention

### Parameter Estimates

| Parameter        | B              | Std. Error | 95% Wald Confidence Interval |        | Hypothesis Test |    |      | Exp(B) |
|------------------|----------------|------------|------------------------------|--------|-----------------|----|------|--------|
|                  |                |            | Lower                        | Upper  | Wald Chi-Square | df | Sig. |        |
| (Intercept)      | -2.241         | .5503      | -3.319                       | -1.162 | 16.581          | 1  | .000 | .106   |
| [Intervention=0] | 1.163          | .3037      | .568                         | 1.758  | 14.668          | 1  | .000 | 3.200  |
| [Intervention=1] | 0 <sup>a</sup> | .          | .                            | .      | .               | .  | .    | 1      |
| (Scale)          | 1              |            |                              |        |                 |    |      |        |

### Parameter Estimates

| Parameter        | 95% Wald Confidence Interval for Exp(B) |       |
|------------------|-----------------------------------------|-------|
|                  | Lower                                   | Upper |
| (Intercept)      |                                         | .313  |
| [Intervention=0] | 1.765                                   | 5.803 |
| [Intervention=1] | .                                       | .     |
| (Scale)          |                                         |       |

Dependent Variable: Overuse  
Model: (Intercept), Intervention

a. Set to zero because this parameter is redundant.

## Estimated Marginal Means: Intervention

| Intervention | Mean | Estimates  |       | 95% Wald Confidence Interval |  |
|--------------|------|------------|-------|------------------------------|--|
|              |      | Std. Error | Lower | Upper                        |  |
| Control      | .34  | .160       | .14   | .85                          |  |
| Intervention | .11  | .059       | .04   | .31                          |  |

\* Generalized Estimating Equations.

GENLIN Reinjure\_all BY Intervention (ORDER=ASCENDING)

/MODEL Intervention INTERCEPT=YES

DISTRIBUTION=POISSON LINK=LOG

/CRITERIA METHOD=FISHER(1) SCALE=1 MAXITERATIONS=100 MAXSTEPHALVING=5

PCONVERGE=1E-006(ABSOLUTE)

SINGULAR=1E-012 ANALYSISTYPE=3(WALD) CILEVEL=95 LIKELIHOOD=FULL

/EMMEANS TABLES=Intervention SCALE=ORIGINAL

/REPEATED SUBJECT=Team WITHINSUBJECT=Player SORT=YES CORRTYPE=INDEPENDENT ADJUSTCORR=YES

COVB=ROBUST MAXITERATIONS=100 PCONVERGE=1e-006(ABSOLUTE) UPDATECORR=1

/MISSING CLASSMISSING=EXCLUDE

/PRINT CPS DESCRIPTIVES MODELINFO SUMMARY SOLUTION (EXPONENTIATED).

## Generalized Linear Models

| Notes                  |                                |                                                                                                      |
|------------------------|--------------------------------|------------------------------------------------------------------------------------------------------|
| Output Created         |                                | 23-OCT-2020 20:58:12                                                                                 |
| Comments               |                                |                                                                                                      |
| Input                  | Data                           | /Users//OneDrive - /RCT<br>Study/Kids<br>RCT/Kids_RCT_final.sav                                      |
|                        | Active Dataset                 | DataSet1                                                                                             |
|                        | Filter                         | <none>                                                                                               |
|                        | Weight                         | <none>                                                                                               |
|                        | Split File                     | <none>                                                                                               |
|                        | N of Rows in Working Data File | 94                                                                                                   |
| Missing Value Handling | Definition of Missing          | User-defined missing values for factor, subject and within-subject variables are treated as missing. |
|                        | Cases Used                     | Statistics are based on cases with valid data for all variables in the model.                        |
| Weight Handling        |                                | not applicable                                                                                       |



|           |                                                                                                                                                                                                                                                                                                                                                                                                                                                                                                                                                                                                                                    |             |
|-----------|------------------------------------------------------------------------------------------------------------------------------------------------------------------------------------------------------------------------------------------------------------------------------------------------------------------------------------------------------------------------------------------------------------------------------------------------------------------------------------------------------------------------------------------------------------------------------------------------------------------------------------|-------------|
| Syntax    | <pre> GENLIN Reinjure_all BY Intervention (ORDER=ASCENDING)   /MODEL Intervention INTERCEPT=YES DISTRIBUTION=POISSON LINK=LOG   /CRITERIA METHOD=FISHER(1) SCALE=1 MAXITERATIONS=100 MAXSTEPHALVING=5 PCONVERGE=1E-006(ABSOLUT E)   SINGULAR=1E-012 ANALYSISTYPE=3(WALD) CILEVEL=95 LIKELIHOOD=FULL   /EMMEANS TABLES=Intervention SCALE=ORIGINAL   /REPEATED SUBJECT=Team WITHINSUBJECT=Player SORT=YES CORRTYPE=INDEPENDENT ADJUSTCORR=YES   COVB=ROBUST MAXITERATIONS=100 PCONVERGE=1e-006(ABSOLUT E) UPDATECORR=1   /MISSING CLASSMISSING=EXCLUDE   /PRINT CPS DESCRIPTIVES MODELINFO SUMMARY SOLUTION (EXPONENTIATED). </pre> |             |
| Resources | Processor Time                                                                                                                                                                                                                                                                                                                                                                                                                                                                                                                                                                                                                     | 00:00:00.07 |
|           | Elapsed Time                                                                                                                                                                                                                                                                                                                                                                                                                                                                                                                                                                                                                       | 00:00:00.00 |

### Model Information

|                                      |              |
|--------------------------------------|--------------|
| Dependent Variable                   | Reinjure_all |
| Probability Distribution             | Poisson      |
| Link Function                        | Log          |
| Subject Effect                       | 1 Team       |
| Within-Subject Effect                | 1 Player     |
| Working Correlation Matrix Structure | Independent  |

### Case Processing Summary

|          | N  | Percent |
|----------|----|---------|
| Included | 94 | 100.0%  |
| Excluded | 0  | 0.0%    |
| Total    | 94 | 100.0%  |

### Correlated Data Summary

|                                    |                       |        |    |
|------------------------------------|-----------------------|--------|----|
| Number of Levels                   | Subject Effect        | Team   | 6  |
|                                    | Within-Subject Effect | Player | 94 |
| Number of Subjects                 |                       |        | 6  |
| Number of Measurements per Subject | Minimum               |        | 13 |
|                                    | Maximum               |        | 20 |
| Correlation Matrix Dimension       |                       |        | 94 |

### Categorical Variable Information

| Factor       |         | N  | Percent |
|--------------|---------|----|---------|
| Intervention | Control | 47 | 50.0%   |

|              |    |        |
|--------------|----|--------|
| Intervention | 47 | 50.0%  |
| Total        | 94 | 100.0% |

**Continuous Variable Information**

| Dependent Variable | Reinjure_all | N  | Minimum | Maximum | Mean  | Std. Deviation |
|--------------------|--------------|----|---------|---------|-------|----------------|
|                    |              | 94 | .00     | 1.00    | .0745 | .26394         |

**Tests of Model Effects**

| Source       | Wald Chi-Square | Type III df | Sig. |
|--------------|-----------------|-------------|------|
| (Intercept)  | 26.248          | 1           | .000 |
| Intervention | .410            | 1           | .522 |

Dependent Variable: Reinjure\_all  
Model: (Intercept), Intervention

**Parameter Estimates**

| Parameter        | B              | Std. Error | 95% Wald Confidence Interval |        | Hypothesis Test |    |      | Exp(B) |
|------------------|----------------|------------|------------------------------|--------|-----------------|----|------|--------|
|                  |                |            | Lower                        | Upper  | Wald Chi-Square | df | Sig. |        |
| (Intercept)      | -3.157         | .9132      | -4.947                       | -1.367 | 11.952          | 1  | .001 | .043   |
| [Intervention=0] | .916           | 1.4317     | -1.890                       | 3.722  | .410            | 1  | .522 | 2.500  |
| [Intervention=1] | 0 <sup>a</sup> | .          | .                            | .      | .               | .  | .    | 1      |
| (Scale)          | 1              |            |                              |        |                 |    |      |        |

**Parameter Estimates**

| Parameter        | 95% Wald Confidence Interval for Exp(B) |        |
|------------------|-----------------------------------------|--------|
|                  | Lower                                   | Upper  |
| (Intercept)      |                                         | .255   |
| [Intervention=0] |                                         | 41.363 |
| [Intervention=1] |                                         | .      |
| (Scale)          |                                         |        |

Dependent Variable: Reinjure\_all  
Model: (Intercept), Intervention

a. Set to zero because this parameter is redundant.

**Estimated Marginal Means: Intervention**

| Intervention | Mean  | Std. Error | 95% Wald Confidence Interval |       |
|--------------|-------|------------|------------------------------|-------|
|              |       |            | Lower                        | Upper |
| Control      | .1064 | .09189     | .0196                        | .5782 |
| Intervention | .0426 | .03886     | .0071                        | .2548 |

\* Generalized Estimating Equations.

GENLIN Incident (REFERENCE=FIRST) BY Intervention (ORDER=ASCENDING)

/MODEL Intervention INTERCEPT=YES

DISTRIBUTION=BINOMIAL LINK=LOGIT

/CRITERIA METHOD=FISHER(1) SCALE=1 MAXITERATIONS=100 MAXSTEPHALVING=5

PCONVERGE=1E-006(ABSOLUTE)

SINGULAR=1E-012 ANALYSISTYPE=3(WALD) CILEVEL=95 LIKELIHOOD=FULL

/EMMEANS TABLES=Intervention SCALE=ORIGINAL

/REPEATED SUBJECT=Team WITHINSUBJECT=Player SORT=YES CORRTYPE=INDEPENDENT ADJUSTCORR=YES

COVB=ROBUST MAXITERATIONS=100 PCONVERGE=1e-006(ABSOLUTE) UPDATECORR=1

/MISSING CLASSMISSING=EXCLUDE

/PRINT CPS DESCRIPTIVES MODELINFO FIT SUMMARY SOLUTION (EXPONENTIATED).

## Generalized Linear Models

| Notes                  |                                | 23-OCT-2020 21:16:51                                                                                                                                                                                                                                                                                                                                                                                                                                                                                                                                                                                                                                    |
|------------------------|--------------------------------|---------------------------------------------------------------------------------------------------------------------------------------------------------------------------------------------------------------------------------------------------------------------------------------------------------------------------------------------------------------------------------------------------------------------------------------------------------------------------------------------------------------------------------------------------------------------------------------------------------------------------------------------------------|
| Output Created         |                                |                                                                                                                                                                                                                                                                                                                                                                                                                                                                                                                                                                                                                                                         |
| Comments               |                                |                                                                                                                                                                                                                                                                                                                                                                                                                                                                                                                                                                                                                                                         |
| Input                  | Data                           | /Users//OneDrive - /RCT Study/Kids RCT/Kids_RCT_final.sav                                                                                                                                                                                                                                                                                                                                                                                                                                                                                                                                                                                               |
|                        | Active Dataset                 | DataSet1                                                                                                                                                                                                                                                                                                                                                                                                                                                                                                                                                                                                                                                |
|                        | Filter                         | <none>                                                                                                                                                                                                                                                                                                                                                                                                                                                                                                                                                                                                                                                  |
|                        | Weight                         | <none>                                                                                                                                                                                                                                                                                                                                                                                                                                                                                                                                                                                                                                                  |
|                        | Split File                     | <none>                                                                                                                                                                                                                                                                                                                                                                                                                                                                                                                                                                                                                                                  |
|                        | N of Rows in Working Data File | 94                                                                                                                                                                                                                                                                                                                                                                                                                                                                                                                                                                                                                                                      |
| Missing Value Handling | Definition of Missing          | User-defined missing values for factor, subject and within-subject variables are treated as missing.                                                                                                                                                                                                                                                                                                                                                                                                                                                                                                                                                    |
|                        | Cases Used                     | Statistics are based on cases with valid data for all variables in the model.                                                                                                                                                                                                                                                                                                                                                                                                                                                                                                                                                                           |
| Weight Handling        |                                | not applicable                                                                                                                                                                                                                                                                                                                                                                                                                                                                                                                                                                                                                                          |
| Syntax                 |                                | <pre> GENLIN Incident (REFERENCE=FIRST) BY Intervention (ORDER=ASCENDING)   /MODEL Intervention INTERCEPT=YES   DISTRIBUTION=BINOMIAL LINK=LOGIT   /CRITERIA METHOD=FISHER(1) SCALE=1 MAXITERATIONS=100 MAXSTEPHALVING=5 PCONVERGE=1E-006(ABSOLUTE)   SINGULAR=1E-012 ANALYSISTYPE=3(WALD) CILEVEL=95 LIKELIHOOD=FULL   /EMMEANS TABLES=Intervention SCALE=ORIGINAL   /REPEATED SUBJECT=Team WITHINSUBJECT=Player SORT=YES CORRTYPE=INDEPENDENT ADJUSTCORR=YES   COVB=ROBUST MAXITERATIONS=100 PCONVERGE=1e-006(ABSOLUTE) UPDATECORR=1   /MISSING CLASSMISSING=EXCLUDE   /PRINT CPS DESCRIPTIVES MODELINFO FIT SUMMARY SOLUTION (EXPONENTIATED). </pre> |
| Resources              | Processor Time                 | 00:00:00.08                                                                                                                                                                                                                                                                                                                                                                                                                                                                                                                                                                                                                                             |
|                        | Elapsed Time                   | 00:00:00.00                                                                                                                                                                                                                                                                                                                                                                                                                                                                                                                                                                                                                                             |

[DataSet1] /Users//OneDrive - /RCT Study/Kids RCT/Kids\_RCT\_final.sav

### Model Information

|                                      |   |                       |
|--------------------------------------|---|-----------------------|
| Dependent Variable                   |   | Incident <sup>a</sup> |
| Probability Distribution             |   | Binomial              |
| Link Function                        |   | Logit                 |
| Subject Effect                       | 1 | Team                  |
| Within-Subject Effect                | 1 | Player                |
| Working Correlation Matrix Structure |   | Independent           |

a. The procedure models 1 as the response, treating 0 as the reference category.

### Case Processing Summary

|          | N  | Percent |
|----------|----|---------|
| Included | 94 | 100.0%  |
| Excluded | 0  | 0.0%    |
| Total    | 94 | 100.0%  |

### Correlated Data Summary

|                                    |                       |        |    |
|------------------------------------|-----------------------|--------|----|
| Number of Levels                   | Subject Effect        | Team   | 6  |
|                                    | Within-Subject Effect | Player | 94 |
| Number of Subjects                 |                       |        | 6  |
| Number of Measurements per Subject | Minimum               |        | 13 |
|                                    | Maximum               |        | 20 |
| Correlation Matrix Dimension       |                       |        | 94 |

### Categorical Variable Information

|                    |              |              | N  | Percent |
|--------------------|--------------|--------------|----|---------|
| Dependent Variable | Incident     | 0            | 9  | 9.6%    |
|                    |              | 1            | 85 | 90.4%   |
|                    |              | Total        | 94 | 100.0%  |
| Factor             | Intervention | Control      | 47 | 50.0%   |
|                    |              | Intervention | 47 | 50.0%   |
|                    |              | Total        | 94 | 100.0%  |

### Goodness of Fit<sup>a</sup>

|                                                                                   | Value  |
|-----------------------------------------------------------------------------------|--------|
| Quasi Likelihood under Independence Model Criterion (QIC) <sup>b</sup>            | 55.690 |
| Corrected Quasi Likelihood under Independence Model Criterion (QICC) <sup>b</sup> | 56.564 |

Dependent Variable: Incident

Model: (Intercept), Intervention<sup>a</sup>

a. Information criteria are in smaller-is-better form.

b. Computed using the full log quasi-likelihood function.

### Tests of Model Effects

| Source       | Wald Chi-Square | Type III df | Sig. |
|--------------|-----------------|-------------|------|
| (Intercept)  | 34.738          | 1           | .000 |
| Intervention | 4.885           | 1           | .027 |

Dependent Variable: Incident

Model: (Intercept), Intervention

### Parameter Estimates

| Parameter        | B              | Std. Error | 95% Wald Confidence Interval |       | Hypothesis Test |    |      | Exp(B) |
|------------------|----------------|------------|------------------------------|-------|-----------------|----|------|--------|
|                  |                |            | Lower                        | Upper | Wald Chi-Square | df | Sig. |        |
| (Intercept)      | 1.584          | .3377      | .922                         | 2.246 | 21.999          | 1  | .000 | 4.875  |
| [Intervention=0] | 2.245          | 1.0155     | .254                         | 4.235 | 4.885           | 1  | .027 | 9.436  |
| [Intervention=1] | 0 <sup>a</sup> | .          | .                            | .     | .               | .  | .    | 1      |
| (Scale)          | 1              |            |                              |       |                 |    |      |        |

**Parameter Estimates**

| Parameter        | 95% Wald Confidence Interval for Exp(B) |        |
|------------------|-----------------------------------------|--------|
|                  | Lower                                   | Upper  |
| (Intercept)      | 2.515                                   | 9.451  |
| [Intervention=0] | 1.289                                   | 69.053 |
| [Intervention=1] | .                                       | .      |
| (Scale)          |                                         |        |

Dependent Variable: Incident

Model: (Intercept), Intervention

a. Set to zero because this parameter is redundant.

**Estimated Marginal Means: Intervention**

| Intervention | Mean | Std. Error | Estimates                          |       |
|--------------|------|------------|------------------------------------|-------|
|              |      |            | 95% Wald Confidence Interval Lower | Upper |
| Control      | .98  | .019       | .89                                | 1.00  |
| Intervention | .83  | .048       | .72                                | .90   |

\* Generalized Estimating Equations.

GENLIN Head\_face\_neck BY Intervention (ORDER=ASCENDING)

/MODEL Intervention INTERCEPT=YES

DISTRIBUTION=POISSON LINK=LOG

/CRITERIA METHOD=FISHER(1) SCALE=1 MAXITERATIONS=100 MAXSTEPHALVING=5

PCONVERGE=1E-006(ABSOLUTE)

SINGULAR=1E-012 ANALYSISTYPE=3(WALD) CILEVEL=95 LIKELIHOOD=FULL

/EMMEANS TABLES=Intervention SCALE=ORIGINAL

/REPEATED SUBJECT=Team WITHINSUBJECT=Player SORT=YES CORRTYPE=INDEPENDENT ADJUSTCORR=YES

COVB=ROBUST MAXITERATIONS=100 PCONVERGE=1e-006(ABSOLUTE) UPDATECORR=1

/MISSING CLASSMISSING=EXCLUDE

/PRINT CPS DESCRIPTIVES MODELINFO FIT SUMMARY SOLUTION (EXPONENTIATED).

## Generalized Linear Models

|                        |                                | Notes                                                                                                                                                                                                                                                                                                                                                                                                                                                                                                                                                                                                                                                                                                     |                      |
|------------------------|--------------------------------|-----------------------------------------------------------------------------------------------------------------------------------------------------------------------------------------------------------------------------------------------------------------------------------------------------------------------------------------------------------------------------------------------------------------------------------------------------------------------------------------------------------------------------------------------------------------------------------------------------------------------------------------------------------------------------------------------------------|----------------------|
| Output Created         |                                |                                                                                                                                                                                                                                                                                                                                                                                                                                                                                                                                                                                                                                                                                                           | 23-OCT-2020 20:36:19 |
| Comments               |                                |                                                                                                                                                                                                                                                                                                                                                                                                                                                                                                                                                                                                                                                                                                           |                      |
| Input                  | Data                           | /Users//OneDrive - /RCT<br>Study/Kids<br>RCT/Kids_RCT_final.sav                                                                                                                                                                                                                                                                                                                                                                                                                                                                                                                                                                                                                                           |                      |
|                        | Active Dataset                 | DataSet1                                                                                                                                                                                                                                                                                                                                                                                                                                                                                                                                                                                                                                                                                                  |                      |
|                        | Filter                         | <none>                                                                                                                                                                                                                                                                                                                                                                                                                                                                                                                                                                                                                                                                                                    |                      |
|                        | Weight                         | <none>                                                                                                                                                                                                                                                                                                                                                                                                                                                                                                                                                                                                                                                                                                    |                      |
|                        | Split File                     | <none>                                                                                                                                                                                                                                                                                                                                                                                                                                                                                                                                                                                                                                                                                                    |                      |
|                        | N of Rows in Working Data File |                                                                                                                                                                                                                                                                                                                                                                                                                                                                                                                                                                                                                                                                                                           | 94                   |
| Missing Value Handling | Definition of Missing          | User-defined missing values for factor, subject and within-subject variables are treated as missing.                                                                                                                                                                                                                                                                                                                                                                                                                                                                                                                                                                                                      |                      |
|                        | Cases Used                     | Statistics are based on cases with valid data for all variables in the model.                                                                                                                                                                                                                                                                                                                                                                                                                                                                                                                                                                                                                             |                      |
| Weight Handling        |                                | not applicable                                                                                                                                                                                                                                                                                                                                                                                                                                                                                                                                                                                                                                                                                            |                      |
| Syntax                 |                                | GENLIN Head_face_neck BY<br>Intervention<br>(ORDER=ASCENDING)<br>/MODEL Intervention<br>INTERCEPT=YES<br>DISTRIBUTION=POISSON<br>LINK=LOG<br>/CRITERIA<br>METHOD=FISHER(1) SCALE=1<br>MAXITERATIONS=100<br>MAXSTEPHALVING=5<br>PCONVERGE=1E-006(ABSOLUTE)<br>SINGULAR=1E-012<br>ANALYSISTYPE=3(WALD)<br>CILEVEL=95<br>LIKELIHOOD=FULL<br>/EMMEANS<br>TABLES=Intervention<br>SCALE=ORIGINAL<br>/REPEATED SUBJECT=Team<br>WITHINSUBJECT=Player<br>SORT=YES<br>CORRTYPE=INDEPENDENT<br>ADJUSTCORR=YES<br>COVB=ROBUST<br>MAXITERATIONS=100<br>PCONVERGE=1e-006(ABSOLUTE)<br>UPDATECORR=1<br>/MISSING<br>CLASSMISSING=EXCLUDE<br>/PRINT CPS DESCRIPTIVES<br>MODELINFO FIT SUMMARY<br>SOLUTION (EXPONENTIATED). |                      |
| Resources              | Processor Time                 |                                                                                                                                                                                                                                                                                                                                                                                                                                                                                                                                                                                                                                                                                                           | 00:00:00.07          |
|                        | Elapsed Time                   |                                                                                                                                                                                                                                                                                                                                                                                                                                                                                                                                                                                                                                                                                                           | 00:00:00.00          |

**Model Information**

|                                      |   |                |
|--------------------------------------|---|----------------|
| Dependent Variable                   |   | Head_face_neck |
| Probability Distribution             |   | Poisson        |
| Link Function                        |   | Log            |
| Subject Effect                       | 1 | Team           |
| Within-Subject Effect                | 1 | Player         |
| Working Correlation Matrix Structure |   | Independent    |

**Case Processing Summary**

|          | N  | Percent |
|----------|----|---------|
| Included | 94 | 100.0%  |
| Excluded | 0  | 0.0%    |
| Total    | 94 | 100.0%  |

**Correlated Data Summary**

|                                    |                       |        |    |
|------------------------------------|-----------------------|--------|----|
| Number of Levels                   | Subject Effect        | Team   | 6  |
|                                    | Within-Subject Effect | Player | 94 |
| Number of Subjects                 |                       |        | 6  |
| Number of Measurements per Subject | Minimum               |        | 13 |
|                                    | Maximum               |        | 20 |
| Correlation Matrix Dimension       |                       |        | 94 |

**Categorical Variable Information**

| Factor | Intervention |              | N  | Percent |
|--------|--------------|--------------|----|---------|
|        |              | Control      | 47 | 50.0%   |
|        |              | Intervention | 47 | 50.0%   |
|        |              | Total        | 94 | 100.0%  |

**Continuous Variable Information**

| Dependent Variable | Head_face_neck | N  | Minimum | Maximum | Mean | Std. Deviation |
|--------------------|----------------|----|---------|---------|------|----------------|
|                    |                | 94 | 0       | 1       | .05  | .226           |

**Goodness of Fit<sup>a</sup>**

|                                                                                   | Value  |
|-----------------------------------------------------------------------------------|--------|
| Quasi Likelihood under Independence Model Criterion (QIC) <sup>b</sup>            | 31.119 |
| Corrected Quasi Likelihood under Independence Model Criterion (QICC) <sup>b</sup> | 33.137 |

Dependent Variable: Head\_face\_neck

Model: (Intercept), Intervention<sup>a</sup>

a. Information criteria are in smaller-is-better form.

b. Computed using the full log quasi-likelihood function.

**Tests of Model Effects**

| Source       | Wald Chi-Square | Type III df | Sig. |
|--------------|-----------------|-------------|------|
| (Intercept)  | 327.929         | 1           | .000 |
| Intervention | .228            | 1           | .633 |

Dependent Variable: Head\_face\_neck

Model: (Intercept), Intervention

| Parameter Estimates |                |            |                              |        |                 |    |      |       |        |
|---------------------|----------------|------------|------------------------------|--------|-----------------|----|------|-------|--------|
| Parameter           | B              | Std. Error | 95% Wald Confidence Interval |        | Hypothesis Test |    |      | Sig.  | Exp(B) |
|                     |                |            | Lower                        | Upper  | Wald Chi-Square | df |      |       |        |
| (Intercept)         | -3.157         | .4988      | -4.135                       | -2.179 | 40.066          | 1  | .000 | .043  |        |
| [Intervention=0]    | .405           | .8485      | -1.258                       | 2.069  | .228            | 1  | .633 | 1.500 |        |
| [Intervention=1]    | 0 <sup>a</sup> | .          | .                            | .      | .               | .  | .    | 1     |        |
| (Scale)             | 1              |            |                              |        |                 |    |      |       |        |

| Parameter Estimates |                                         |      |       |
|---------------------|-----------------------------------------|------|-------|
| Parameter           | 95% Wald Confidence Interval for Exp(B) |      |       |
|                     | Lower                                   |      | Upper |
| (Intercept)         |                                         | .016 | .113  |
| [Intervention=0]    |                                         | .284 | 7.913 |
| [Intervention=1]    |                                         | .    | .     |
| (Scale)             |                                         |      |       |

Dependent Variable: Head\_face\_neck

Model: (Intercept), Intervention

a. Set to zero because this parameter is redundant.

### Estimated Marginal Means: Intervention

| Intervention | Mean | Std. Error | Estimates                          |       |
|--------------|------|------------|------------------------------------|-------|
|              |      |            | 95% Wald Confidence Interval Lower | Upper |
| Control      | .06  | .026       | .03                                | .14   |
| Intervention | .04  | .021       | .02                                | .11   |

\* Generalized Estimating Equations.

GENLIN Shoulder BY Intervention (ORDER=ASCENDING)

/MODEL Intervention INTERCEPT=YES

DISTRIBUTION=POISSON LINK=LOG

/CRITERIA METHOD=FISHER(1) SCALE=1 MAXITERATIONS=100 MAXSTEPHALVING=5

PCONVERGE=1E-006(ABSOLUTE)

SINGULAR=1E-012 ANALYSISTYPE=3(WALD) CILEVEL=95 LIKELIHOOD=FULL

/EMMEANS TABLES=Intervention SCALE=ORIGINAL

/REPEATED SUBJECT=Team WITHINSUBJECT=Player SORT=YES CORRTYPE=INDEPENDENT ADJUSTCORR=YES

COVB=ROBUST MAXITERATIONS=100 PCONVERGE=1e-006(ABSOLUTE) UPDATECORR=1

/MISSING CLASSMISSING=EXCLUDE

/PRINT CPS DESCRIPTIVES MODELINFO SUMMARY SOLUTION (EXPONENTIATED).

### Generalized Linear Models

| Notes          |                                |                                                           |
|----------------|--------------------------------|-----------------------------------------------------------|
| Output Created |                                | 23-OCT-2020 20:36:52                                      |
| Comments       |                                |                                                           |
| Input          | Data                           | /Users//OneDrive - /RCT Study/Kids RCT/Kids_RCT_final.sav |
|                | Active Dataset                 | DataSet1                                                  |
|                | Filter                         | <none>                                                    |
|                | Weight                         | <none>                                                    |
|                | Split File                     | <none>                                                    |
|                | N of Rows in Working Data File | 94                                                        |



|                        |                       |                                                                                                                                                                                                                                                                                                                                                                                                                                                                                                                                                                                                                              |
|------------------------|-----------------------|------------------------------------------------------------------------------------------------------------------------------------------------------------------------------------------------------------------------------------------------------------------------------------------------------------------------------------------------------------------------------------------------------------------------------------------------------------------------------------------------------------------------------------------------------------------------------------------------------------------------------|
| Missing Value Handling | Definition of Missing | User-defined missing values for factor, subject and within-subject variables are treated as missing.                                                                                                                                                                                                                                                                                                                                                                                                                                                                                                                         |
|                        | Cases Used            | Statistics are based on cases with valid data for all variables in the model.                                                                                                                                                                                                                                                                                                                                                                                                                                                                                                                                                |
| Weight Handling        |                       | not applicable                                                                                                                                                                                                                                                                                                                                                                                                                                                                                                                                                                                                               |
| Syntax                 |                       | <pre> GENLIN Shoulder BY Intervention (ORDER=ASCENDING)   /MODEL Intervention INTERCEPT=YES DISTRIBUTION=POISSON LINK=LOG   /CRITERIA METHOD=FISHER(1) SCALE=1 MAXITERATIONS=100 MAXSTEPHALVING=5 PCONVERGE=1E-006(ABSOLUTE)   SINGULAR=1E-012 ANALYSISTYPE=3(WALD) CILEVEL=95 LIKELIHOOD=FULL   /EMMEANS TABLES=Intervention SCALE=ORIGINAL   /REPEATED SUBJECT=Team WITHINSUBJECT=Player SORT=YES CORRTYPE=INDEPENDENT ADJUSTCORR=YES   COVB=ROBUST MAXITERATIONS=100 PCONVERGE=1e-006(ABSOLUTE) UPDATECORR=1   /MISSING CLASSMISSING=EXCLUDE   /PRINT CPS DESCRIPTIVES MODELINFO SUMMARY SOLUTION (EXPONENTIATED). </pre> |
| Resources              | Processor Time        | 00:00:00.08                                                                                                                                                                                                                                                                                                                                                                                                                                                                                                                                                                                                                  |
|                        | Elapsed Time          | 00:00:00.00                                                                                                                                                                                                                                                                                                                                                                                                                                                                                                                                                                                                                  |

### Model Information

|                                      |   |             |
|--------------------------------------|---|-------------|
| Dependent Variable                   |   | Shoulder    |
| Probability Distribution             |   | Poisson     |
| Link Function                        |   | Log         |
| Subject Effect                       | 1 | Team        |
| Within-Subject Effect                | 1 | Player      |
| Working Correlation Matrix Structure |   | Independent |

### Case Processing Summary

|          | N  | Percent |
|----------|----|---------|
| Included | 94 | 100.0%  |
| Excluded | 0  | 0.0%    |
| Total    | 94 | 100.0%  |

### Correlated Data Summary

|                                    |                       |        |    |
|------------------------------------|-----------------------|--------|----|
| Number of Levels                   | Subject Effect        | Team   | 6  |
|                                    | Within-Subject Effect | Player | 94 |
| Number of Subjects                 |                       |        | 6  |
| Number of Measurements per Subject | Minimum               |        | 13 |
|                                    | Maximum               |        | 20 |

**Categorical Variable Information**

| Factor | Intervention | N       |              | Percent |              |
|--------|--------------|---------|--------------|---------|--------------|
|        |              | Control | Intervention | Control | Intervention |
|        | Control      | 47      | 47           | 50.0%   | 50.0%        |
|        | Intervention | 47      | 47           | 50.0%   | 50.0%        |
|        | Total        | 94      | 94           | 100.0%  | 100.0%       |

**Continuous Variable Information**

| Dependent Variable | Shoulder | N  | Minimum | Maximum | Mean | Std. Deviation |
|--------------------|----------|----|---------|---------|------|----------------|
|                    | Shoulder | 94 | 0       | 1       | .04  | .203           |

**Tests of Model Effects**

| Source       | Wald Chi-Square | Type III df | Sig. |
|--------------|-----------------|-------------|------|
| (Intercept)  | 76.326          | 1           | .000 |
| Intervention | .864            | 1           | .353 |

Dependent Variable: Shoulder

Model: (Intercept), Intervention

**Parameter Estimates**

| Parameter        | B              | Std. Error | 95% Wald Confidence Interval |        | Hypothesis Test |    |      | Exp(B) |
|------------------|----------------|------------|------------------------------|--------|-----------------|----|------|--------|
|                  |                |            | Lower                        | Upper  | Wald Chi-Square | df | Sig. |        |
| (Intercept)      | -3.850         | .9132      | -5.640                       | -2.060 | 17.777          | 1  | .000 | .021   |
| [Intervention=0] | 1.099          | 1.1821     | -1.218                       | 3.415  | .864            | 1  | .353 | 3.000  |
| [Intervention=1] | 0 <sup>a</sup> | .          | .                            | .      | .               | .  | .    | 1      |
| (Scale)          | 1              | .          | .                            | .      | .               | .  | .    | .      |

**Parameter Estimates**

| Parameter        | 95% Wald Confidence Interval for Exp(B) |        |
|------------------|-----------------------------------------|--------|
|                  | Lower                                   | Upper  |
| (Intercept)      | .004                                    | .127   |
| [Intervention=0] | .296                                    | 30.431 |
| [Intervention=1] | .                                       | .      |
| (Scale)          | .                                       | .      |

Dependent Variable: Shoulder

Model: (Intercept), Intervention

a. Set to zero because this parameter is redundant.

**Estimated Marginal Means: Intervention**

| Intervention | Estimates |            |                              |       |
|--------------|-----------|------------|------------------------------|-------|
|              | Mean      | Std. Error | 95% Wald Confidence Interval |       |
|              |           |            | Lower                        | Upper |
| Control      | .06       | .025       | .03                          | .14   |
| Intervention | .02       | .019       | .00                          | .13   |

\* Generalized Estimating Equations.

GENLIN Finger\_hand\_wrist\_arm BY Intervention (ORDER=ASCENDING)

/MODEL Intervention INTERCEPT=YES

DISTRIBUTION=POISSON LINK=LOG

/CRITERIA METHOD=FISHER(1) SCALE=1 MAXITERATIONS=100 MAXSTEPHALVING=5

PCONVERGE=1E-006(ABSOLUTE)

SINGULAR=1E-012 ANALYSISTYPE=3(WALD) CILEVEL=95 LIKELIHOOD=FULL

/EMMEANS TABLES=Intervention SCALE=ORIGINAL

/REPEATED SUBJECT=Team WITHINSUBJECT=Player SORT=YES CORRTYPE=INDEPENDENT ADJUSTCORR=YES  
 COVB=ROBUST MAXITERATIONS=100 PCONVERGE=1e-006(ABSOLUTE) UPDATECORR=1  
 /MISSING CLASSMISSING=EXCLUDE  
 /PRINT CPS DESCRIPTIVES MODELINFO SUMMARY SOLUTION (EXPONENTIATED).

## Generalized Linear Models

| Notes                  |                                |                                                                                                                                                                                                                                                                                                                                                                                                                                                                                                                                                                                                                                                                                                              |
|------------------------|--------------------------------|--------------------------------------------------------------------------------------------------------------------------------------------------------------------------------------------------------------------------------------------------------------------------------------------------------------------------------------------------------------------------------------------------------------------------------------------------------------------------------------------------------------------------------------------------------------------------------------------------------------------------------------------------------------------------------------------------------------|
| Output Created         |                                | 23-OCT-2020 20:37:13                                                                                                                                                                                                                                                                                                                                                                                                                                                                                                                                                                                                                                                                                         |
| Comments               |                                |                                                                                                                                                                                                                                                                                                                                                                                                                                                                                                                                                                                                                                                                                                              |
| Input                  | Data                           | /Users//OneDrive - /RCT<br>Study/Kids<br>RCT/Kids_RCT_final.sav                                                                                                                                                                                                                                                                                                                                                                                                                                                                                                                                                                                                                                              |
|                        | Active Dataset                 | DataSet1                                                                                                                                                                                                                                                                                                                                                                                                                                                                                                                                                                                                                                                                                                     |
|                        | Filter                         | <none>                                                                                                                                                                                                                                                                                                                                                                                                                                                                                                                                                                                                                                                                                                       |
|                        | Weight                         | <none>                                                                                                                                                                                                                                                                                                                                                                                                                                                                                                                                                                                                                                                                                                       |
|                        | Split File                     | <none>                                                                                                                                                                                                                                                                                                                                                                                                                                                                                                                                                                                                                                                                                                       |
|                        | N of Rows in Working Data File | 94                                                                                                                                                                                                                                                                                                                                                                                                                                                                                                                                                                                                                                                                                                           |
| Missing Value Handling | Definition of Missing          | User-defined missing values for factor, subject and within-subject variables are treated as missing.                                                                                                                                                                                                                                                                                                                                                                                                                                                                                                                                                                                                         |
|                        | Cases Used                     | Statistics are based on cases with valid data for all variables in the model.                                                                                                                                                                                                                                                                                                                                                                                                                                                                                                                                                                                                                                |
| Weight Handling        |                                | not applicable                                                                                                                                                                                                                                                                                                                                                                                                                                                                                                                                                                                                                                                                                               |
| Syntax                 |                                | GENLIN Finger_hand_wrist_arm<br>BY Intervention<br>(ORDER=ASCENDING)<br>/MODEL Intervention<br>INTERCEPT=YES<br>DISTRIBUTION=POISSON<br>LINK=LOG<br>/CRITERIA<br>METHOD=FISHER(1) SCALE=1<br>MAXITERATIONS=100<br>MAXSTEPHALVING=5<br>PCONVERGE=1E-006(ABSOLUTE)<br>SINGULAR=1E-012<br>ANALYSISTYPE=3(WALD)<br>CILEVEL=95<br>LIKELIHOOD=FULL<br>/EMMEANS<br>TABLES=Intervention<br>SCALE=ORIGINAL<br>/REPEATED SUBJECT=Team<br>WITHINSUBJECT=Player<br>SORT=YES<br>CORRTYPE=INDEPENDENT<br>ADJUSTCORR=YES<br>COVB=ROBUST<br>MAXITERATIONS=100<br>PCONVERGE=1e-006(ABSOLUTE)<br>UPDATECORR=1<br>/MISSING<br>CLASSMISSING=EXCLUDE<br>/PRINT CPS DESCRIPTIVES<br>MODELINFO SUMMARY<br>SOLUTION (EXPONENTIATED). |
| Resources              | Processor Time                 | 00:00:00.09                                                                                                                                                                                                                                                                                                                                                                                                                                                                                                                                                                                                                                                                                                  |
|                        | Elapsed Time                   | 00:00:00.00                                                                                                                                                                                                                                                                                                                                                                                                                                                                                                                                                                                                                                                                                                  |

**Model Information**

|                                      |                       |        |
|--------------------------------------|-----------------------|--------|
| Dependent Variable                   | Finger_hand_wrist_arm |        |
| Probability Distribution             | Poisson               |        |
| Link Function                        | Log                   |        |
| Subject Effect                       | 1                     | Team   |
| Within-Subject Effect                | 1                     | Player |
| Working Correlation Matrix Structure | Independent           |        |

**Case Processing Summary**

|          | N  | Percent |
|----------|----|---------|
| Included | 94 | 100.0%  |
| Excluded | 0  | 0.0%    |
| Total    | 94 | 100.0%  |

**Correlated Data Summary**

|                                    |                       |        |    |
|------------------------------------|-----------------------|--------|----|
| Number of Levels                   | Subject Effect        | Team   | 6  |
|                                    | Within-Subject Effect | Player | 94 |
| Number of Subjects                 |                       |        | 6  |
| Number of Measurements per Subject | Minimum               | 13     |    |
|                                    | Maximum               | 20     |    |
| Correlation Matrix Dimension       |                       |        | 94 |

**Categorical Variable Information**

| Factor | Intervention |  | N  | Percent |
|--------|--------------|--|----|---------|
|        | Control      |  | 47 | 50.0%   |
|        | Intervention |  | 47 | 50.0%   |
|        | Total        |  | 94 | 100.0%  |

**Continuous Variable Information**

| Dependent Variable | Finger_hand_wrist_arm | N  | Minimum | Maximum | Mean | Std. Deviation |
|--------------------|-----------------------|----|---------|---------|------|----------------|
|                    |                       | 94 | 0       | 2       | .22  | .467           |

**Tests of Model Effects**

| Source       | Wald Chi-Square | Type III df | Sig. |
|--------------|-----------------|-------------|------|
| (Intercept)  | 246.577         | 1           | .000 |
| Intervention | 10.728          | 1           | .001 |

Dependent Variable: Finger\_hand\_wrist\_arm

Model: (Intercept), Intervention

**Parameter Estimates**

| Parameter        | B              | Std. Error | 95% Wald Confidence Interval |        | Hypothesis Test |    |      | Exp(B) |
|------------------|----------------|------------|------------------------------|--------|-----------------|----|------|--------|
|                  |                |            | Lower                        | Upper  | Wald Chi-Square | df | Sig. |        |
| (Intercept)      | -2.058         | .1866      | -2.424                       | -1.693 | 121.727         | 1  | .000 | .128   |
| [Intervention=0] | .916           | .2797      | .368                         | 1.465  | 10.728          | 1  | .001 | 2.500  |
| [Intervention=1] | 0 <sup>a</sup> | .          | .                            | .      | .               | .  | .    | 1      |
| (Scale)          | 1              |            |                              |        |                 |    |      |        |

**Parameter Estimates**

| Parameter        | 95% Wald Confidence Interval for Exp(B) |       |
|------------------|-----------------------------------------|-------|
|                  | Lower                                   | Upper |
| (Intercept)      |                                         | .184  |
| [Intervention=0] | 1.445                                   | 4.326 |
| [Intervention=1] | .                                       | .     |
| (Scale)          |                                         |       |

Dependent Variable: Finger\_hand\_wrist\_arm  
 Model: (Intercept), Intervention  
 a. Set to zero because this parameter is redundant.

**Estimated Marginal Means: Intervention**

| Intervention | Estimates |            |                              |       |
|--------------|-----------|------------|------------------------------|-------|
|              | Mean      | Std. Error | 95% Wald Confidence Interval |       |
|              |           |            | Lower                        | Upper |
| Control      | .32       | .051       | .23                          | .44   |
| Intervention | .13       | .024       | .09                          | .18   |

\* Generalized Estimating Equations.  
 GENLIN Chest BY Intervention (ORDER=ASCENDING)  
 /MODEL Intervention INTERCEPT=YES  
 DISTRIBUTION=POISSON LINK=LOG  
 /CRITERIA METHOD=FISHER(1) SCALE=1 MAXITERATIONS=100 MAXSTEPHALVING=5  
 PCONVERGE=1E-006(ABSOLUTE)  
 SINGULAR=1E-012 ANALYSISTYPE=3(WALD) CILEVEL=95 LIKELIHOOD=FULL  
 /EMMEANS TABLES=Intervention SCALE=ORIGINAL  
 /REPEATED SUBJECT=Team WITHINSUBJECT=Player SORT=YES CORRTYPE=INDEPENDENT ADJUSTCORR=YES  
 COVB=ROBUST MAXITERATIONS=100 PCONVERGE=1e-006(ABSOLUTE) UPDATECORR=1  
 /MISSING CLASSMISSING=EXCLUDE  
 /PRINT CPS DESCRIPTIVES MODELINFO SUMMARY SOLUTION (EXPONENTIATED).

**Generalized Linear Models**

| Notes                  |                                |                                                                                                      |
|------------------------|--------------------------------|------------------------------------------------------------------------------------------------------|
| Output Created         |                                | 23-OCT-2020 20:37:45                                                                                 |
| Comments               |                                |                                                                                                      |
| Input                  | Data                           | /Users//OneDrive - /RCT<br>Study/Kids<br>RCT/Kids_RCT_final.sav                                      |
|                        | Active Dataset                 | DataSet1                                                                                             |
|                        | Filter                         | <none>                                                                                               |
|                        | Weight                         | <none>                                                                                               |
|                        | Split File                     | <none>                                                                                               |
|                        | N of Rows in Working Data File |                                                                                                      |
| Missing Value Handling | Definition of Missing          | User-defined missing values for factor, subject and within-subject variables are treated as missing. |
|                        | Cases Used                     | Statistics are based on cases with valid data for all variables in the model.                        |
| Weight Handling        |                                | not applicable                                                                                       |

|           |                                                                                                                                                                                                                                                                                                                                                                                                                                                                                                                                                                                                                                                                                           |             |
|-----------|-------------------------------------------------------------------------------------------------------------------------------------------------------------------------------------------------------------------------------------------------------------------------------------------------------------------------------------------------------------------------------------------------------------------------------------------------------------------------------------------------------------------------------------------------------------------------------------------------------------------------------------------------------------------------------------------|-------------|
| Syntax    | GENLIN Chest BY Intervention<br>(ORDER=ASCENDING)<br>/MODEL Intervention<br>INTERCEPT=YES<br>DISTRIBUTION=POISSON<br>LINK=LOG<br>/CRITERIA<br>METHOD=FISHER(1) SCALE=1<br>MAXITERATIONS=100<br>MAXSTEPHALVING=5<br>PCONVERGE=1E-006(ABSOLUTE)<br>SINGULAR=1E-012<br>ANALYSISTYPE=3(WALD)<br>CILEVEL=95<br>LIKELIHOOD=FULL<br>/EMMEANS<br>TABLES=Intervention<br>SCALE=ORIGINAL<br>/REPEATED SUBJECT=Team<br>WITHINSUBJECT=Player<br>SORT=YES<br>CORRTYPE=INDEPENDENT<br>ADJUSTCORR=YES<br>COVB=ROBUST<br>MAXITERATIONS=100<br>PCONVERGE=1e-006(ABSOLUTE)<br>UPDATECORR=1<br>/MISSING<br>CLASSMISSING=EXCLUDE<br>/PRINT CPS DESCRIPTIVES<br>MODELINFO SUMMARY<br>SOLUTION (EXPONENTIATED). |             |
| Resources | Processor Time                                                                                                                                                                                                                                                                                                                                                                                                                                                                                                                                                                                                                                                                            | 00:00:00.11 |
|           | Elapsed Time                                                                                                                                                                                                                                                                                                                                                                                                                                                                                                                                                                                                                                                                              | 00:00:00.00 |

### Model Information

|                                      |   |             |
|--------------------------------------|---|-------------|
| Dependent Variable                   |   | Chest       |
| Probability Distribution             |   | Poisson     |
| Link Function                        |   | Log         |
| Subject Effect                       | 1 | Team        |
| Within-Subject Effect                | 1 | Player      |
| Working Correlation Matrix Structure |   | Independent |

### Case Processing Summary

|          | N  | Percent |
|----------|----|---------|
| Included | 94 | 100.0%  |
| Excluded | 0  | 0.0%    |
| Total    | 94 | 100.0%  |

### Correlated Data Summary

|                                    |                       |        |    |
|------------------------------------|-----------------------|--------|----|
| Number of Levels                   | Subject Effect        | Team   | 6  |
|                                    | Within-Subject Effect | Player | 94 |
| Number of Subjects                 |                       |        | 6  |
| Number of Measurements per Subject | Minimum               |        | 13 |
|                                    | Maximum               |        | 20 |
| Correlation Matrix Dimension       |                       |        | 94 |

### Categorical Variable Information

| Factor | Intervention |  | N  | Percent |
|--------|--------------|--|----|---------|
|        | Control      |  | 47 | 50.0%   |
|        | Intervention |  | 47 | 50.0%   |

|       |    |        |
|-------|----|--------|
| Total | 94 | 100.0% |
|-------|----|--------|

### Continuous Variable Information

| Dependent Variable | Chest | N  | Minimum | Maximum | Mean | Std. Deviation |
|--------------------|-------|----|---------|---------|------|----------------|
|                    |       | 94 | 0       | 1       | .03  | .177           |

### Tests of Model Effects

| Source       | Wald Chi-Square | Type III df | Sig. |
|--------------|-----------------|-------------|------|
| (Intercept)  | 25.452          | 1           | .000 |
| Intervention | .783            | 1           | .376 |

Dependent Variable: Chest  
Model: (Intercept), Intervention

### Parameter Estimates

| Parameter        | B              | Std. Error | 95% Wald Confidence Interval |        | Hypothesis Test |    |      | Exp(B) |
|------------------|----------------|------------|------------------------------|--------|-----------------|----|------|--------|
|                  |                |            | Lower                        | Upper  | Wald Chi-Square | df | Sig. |        |
| (Intercept)      | -3.850         | .9586      | -5.729                       | -1.971 | 16.131          | 1  | .000 | .021   |
| [Intervention=0] | .693           | .7833      | -.842                        | 2.228  | .783            | 1  | .376 | 2.000  |
| [Intervention=1] | 0 <sup>a</sup> | .          | .                            | .      | .               | .  | .    | 1      |
| (Scale)          | 1              |            |                              |        |                 |    |      |        |

### Parameter Estimates

| Parameter        | 95% Wald Confidence Interval for Exp(B) |       |
|------------------|-----------------------------------------|-------|
|                  | Lower                                   | Upper |
| (Intercept)      | .003                                    | .139  |
| [Intervention=0] | .431                                    | 9.286 |
| [Intervention=1] | .                                       | .     |
| (Scale)          |                                         |       |

Dependent Variable: Chest  
Model: (Intercept), Intervention

a. Set to zero because this parameter is redundant.

### Estimated Marginal Means: Intervention

| Intervention | Mean | Std. Error | Estimates                          |       |
|--------------|------|------------|------------------------------------|-------|
|              |      |            | 95% Wald Confidence Interval Lower | Upper |
| Control      | .04  | .025       | .01                                | .14   |
| Intervention | .02  | .020       | .00                                | .14   |

\* Generalized Estimating Equations.

GENLIN Trunk\_Abdomen BY Intervention (ORDER=ASCENDING)

/MODEL Intervention INTERCEPT=YES

DISTRIBUTION=POISSON LINK=LOG

/CRITERIA METHOD=FISHER(1) SCALE=1 MAXITERATIONS=100 MAXSTEPHALVING=5

PCONVERGE=1E-006(ABSOLUTE)

SINGULAR=1E-012 ANALYSISTYPE=3(WALD) CILEVEL=95 LIKELIHOOD=FULL

/EMMEANS TABLES=Intervention SCALE=ORIGINAL

/REPEATED SUBJECT=Team WITHINSUBJECT=Player SORT=YES CORRTYPE=INDEPENDENT ADJUSTCORR=YES

COVB=ROBUST MAXITERATIONS=100 PCONVERGE=1e-006(ABSOLUTE) UPDATECORR=1

/MISSING CLASSMISSING=EXCLUDE

/PRINT CPS DESCRIPTIVES MODELINFO SUMMARY SOLUTION (EXPONENTIATED).

## Generalized Linear Models

| Notes                  |                                | 23-OCT-2020 20:38:01                                                                                                                                                                                                                                                                                                                                                                                                                                                                                                                                                                                                                                                                                    |
|------------------------|--------------------------------|---------------------------------------------------------------------------------------------------------------------------------------------------------------------------------------------------------------------------------------------------------------------------------------------------------------------------------------------------------------------------------------------------------------------------------------------------------------------------------------------------------------------------------------------------------------------------------------------------------------------------------------------------------------------------------------------------------|
| Output Created         |                                |                                                                                                                                                                                                                                                                                                                                                                                                                                                                                                                                                                                                                                                                                                         |
| Comments               |                                |                                                                                                                                                                                                                                                                                                                                                                                                                                                                                                                                                                                                                                                                                                         |
| Input                  | Data                           | /Users//OneDrive - /RCT<br>Study/Kids<br>RCT/Kids_RCT_final.sav                                                                                                                                                                                                                                                                                                                                                                                                                                                                                                                                                                                                                                         |
|                        | Active Dataset                 | DataSet1                                                                                                                                                                                                                                                                                                                                                                                                                                                                                                                                                                                                                                                                                                |
|                        | Filter                         | <none>                                                                                                                                                                                                                                                                                                                                                                                                                                                                                                                                                                                                                                                                                                  |
|                        | Weight                         | <none>                                                                                                                                                                                                                                                                                                                                                                                                                                                                                                                                                                                                                                                                                                  |
|                        | Split File                     | <none>                                                                                                                                                                                                                                                                                                                                                                                                                                                                                                                                                                                                                                                                                                  |
|                        | N of Rows in Working Data File | 94                                                                                                                                                                                                                                                                                                                                                                                                                                                                                                                                                                                                                                                                                                      |
| Missing Value Handling | Definition of Missing          | User-defined missing values for factor, subject and within-subject variables are treated as missing.                                                                                                                                                                                                                                                                                                                                                                                                                                                                                                                                                                                                    |
|                        | Cases Used                     | Statistics are based on cases with valid data for all variables in the model.                                                                                                                                                                                                                                                                                                                                                                                                                                                                                                                                                                                                                           |
| Weight Handling        |                                | not applicable                                                                                                                                                                                                                                                                                                                                                                                                                                                                                                                                                                                                                                                                                          |
| Syntax                 |                                | GENLIN Trunk_Abdomen BY<br>Intervention<br>(ORDER=ASCENDING)<br>/MODEL Intervention<br>INTERCEPT=YES<br>DISTRIBUTION=POISSON<br>LINK=LOG<br>/CRITERIA<br>METHOD=FISHER(1) SCALE=1<br>MAXITERATIONS=100<br>MAXSTEPHALVING=5<br>PCONVERGE=1E-006(ABSOLUTE)<br>SINGULAR=1E-012<br>ANALYSISTYPE=3(WALD)<br>CILEVEL=95<br>LIKELIHOOD=FULL<br>/EMMEANS<br>TABLES=Intervention<br>SCALE=ORIGINAL<br>/REPEATED SUBJECT=Team<br>WITHINSUBJECT=Player<br>SORT=YES<br>CORRTYPE=INDEPENDENT<br>ADJUSTCORR=YES<br>COVB=ROBUST<br>MAXITERATIONS=100<br>PCONVERGE=1e-006(ABSOLUTE)<br>E) UPDATECORR=1<br>/MISSING<br>CLASSMISSING=EXCLUDE<br>/PRINT CPS DESCRIPTIVES<br>MODELINFO SUMMARY<br>SOLUTION (EXPONENTIATED). |
| Resources              | Processor Time                 | 00:00:00.10                                                                                                                                                                                                                                                                                                                                                                                                                                                                                                                                                                                                                                                                                             |
|                        | Elapsed Time                   | 00:00:01.00                                                                                                                                                                                                                                                                                                                                                                                                                                                                                                                                                                                                                                                                                             |

### Model Information

|                          |               |
|--------------------------|---------------|
| Dependent Variable       | Trunk_Abdomen |
| Probability Distribution | Poisson       |
| Link Function            | Log           |
| Subject Effect           | 1 Team        |



|                                      |   |             |
|--------------------------------------|---|-------------|
| Within-Subject Effect                | 1 | Player      |
| Working Correlation Matrix Structure |   | Independent |

### Case Processing Summary

|          | N  | Percent |
|----------|----|---------|
| Included | 94 | 100.0%  |
| Excluded | 0  | 0.0%    |
| Total    | 94 | 100.0%  |

### Correlated Data Summary

|                                    |                       |        |    |
|------------------------------------|-----------------------|--------|----|
| Number of Levels                   | Subject Effect        | Team   | 6  |
|                                    | Within-Subject Effect | Player | 94 |
| Number of Subjects                 |                       |        | 6  |
| Number of Measurements per Subject | Minimum               |        | 13 |
|                                    | Maximum               |        | 20 |
| Correlation Matrix Dimension       |                       |        | 94 |

### Categorical Variable Information

| Factor | Intervention |  | N  | Percent |
|--------|--------------|--|----|---------|
|        | Control      |  | 47 | 50.0%   |
|        | Intervention |  | 47 | 50.0%   |
|        | Total        |  | 94 | 100.0%  |

### Continuous Variable Information

| Dependent Variable |  | N  | Minimum | Maximum | Mean | Std. Deviation |
|--------------------|--|----|---------|---------|------|----------------|
| Trunk_Abdomen      |  | 94 | 0       | 1       | .03  | .177           |

### Tests of Model Effects

| Source       | Wald Chi-Square | Type III df | Sig. |
|--------------|-----------------|-------------|------|
| (Intercept)  | 61.261          | 1           | .000 |
| Intervention | .290            | 1           | .590 |

Dependent Variable: Trunk\_Abdomen

Model: (Intercept), Intervention

### Parameter Estimates

| Parameter        | B              | Std. Error | 95% Wald Confidence Interval |        | Hypothesis Test |    |      | Exp(B) |
|------------------|----------------|------------|------------------------------|--------|-----------------|----|------|--------|
|                  |                |            | Lower                        | Upper  | Wald Chi-Square | df | Sig. |        |
| (Intercept)      | -3.850         | .9586      | -5.729                       | -1.971 | 16.131          | 1  | .000 | .021   |
| [Intervention=0] | .693           | 1.2869     | -1.829                       | 3.215  | .290            | 1  | .590 | 2.000  |
| [Intervention=1] | 0 <sup>a</sup> | .          | .                            | .      | .               | .  | .    | 1      |
| (Scale)          | 1              |            |                              |        |                 |    |      |        |

### Parameter Estimates

| Parameter        | 95% Wald Confidence Interval for Exp(B) |        |
|------------------|-----------------------------------------|--------|
|                  | Lower                                   | Upper  |
| (Intercept)      | .003                                    | .139   |
| [Intervention=0] | .161                                    | 24.915 |
| [Intervention=1] | .                                       | .      |
| (Scale)          |                                         |        |

Dependent Variable: Trunk\_Abdomen

Model: (Intercept), Intervention

a. Set to zero because this parameter is redundant.

**Estimated Marginal Means: Intervention**

| Intervention | Mean | Estimates  |                              |       |
|--------------|------|------------|------------------------------|-------|
|              |      | Std. Error | 95% Wald Confidence Interval |       |
|              |      |            | Lower                        | Upper |
| Control      | .04  | .024       | .01                          | .13   |
| Intervention | .02  | .020       | .00                          | .14   |

\* Generalized Estimating Equations.

GENLIN LowBack BY Intervention (ORDER=ASCENDING)

/MODEL Intervention INTERCEPT=YES

DISTRIBUTION=POISSON LINK=LOG

/CRITERIA METHOD=FISHER(1) SCALE=1 MAXITERATIONS=100 MAXSTEPHALVING=5

PCONVERGE=1E-006(ABSOLUTE)

SINGULAR=1E-012 ANALYSISTYPE=3(WALD) CILEVEL=95 LIKELIHOOD=FULL

/EMMEANS TABLES=Intervention SCALE=ORIGINAL

/REPEATED SUBJECT=Team WITHINSUBJECT=Player SORT=YES CORRTYPE=INDEPENDENT ADJUSTCORR=YES

COVB=ROBUST MAXITERATIONS=100 PCONVERGE=1e-006(ABSOLUTE) UPDATECORR=1

/MISSING CLASSMISSING=EXCLUDE

/PRINT CPS DESCRIPTIVES MODELINFO SUMMARY SOLUTION (EXPONENTIATED).

**Generalized Linear Models**

| Notes                  |                                |                                                                                                      |
|------------------------|--------------------------------|------------------------------------------------------------------------------------------------------|
| Output Created         |                                | 23-OCT-2020 20:38:17                                                                                 |
| Comments               |                                |                                                                                                      |
| Input                  | Data                           | /Users//OneDrive - /RCT<br>Study/Kids<br>RCT/Kids_RCT_final.sav                                      |
|                        | Active Dataset                 | DataSet1                                                                                             |
|                        | Filter                         | <none>                                                                                               |
|                        | Weight                         | <none>                                                                                               |
|                        | Split File                     | <none>                                                                                               |
|                        | N of Rows in Working Data File | 94                                                                                                   |
| Missing Value Handling | Definition of Missing          | User-defined missing values for factor, subject and within-subject variables are treated as missing. |
|                        | Cases Used                     | Statistics are based on cases with valid data for all variables in the model.                        |
| Weight Handling        |                                | not applicable                                                                                       |

|           |                                                                                                                                                                                                                                                                                                                                                                                                                                                                                                                                                                                                                                                                                             |             |
|-----------|---------------------------------------------------------------------------------------------------------------------------------------------------------------------------------------------------------------------------------------------------------------------------------------------------------------------------------------------------------------------------------------------------------------------------------------------------------------------------------------------------------------------------------------------------------------------------------------------------------------------------------------------------------------------------------------------|-------------|
| Syntax    | GENLIN LowBack BY Intervention<br>(ORDER=ASCENDING)<br>/MODEL Intervention<br>INTERCEPT=YES<br>DISTRIBUTION=POISSON<br>LINK=LOG<br>/CRITERIA<br>METHOD=FISHER(1) SCALE=1<br>MAXITERATIONS=100<br>MAXSTEPHALVING=5<br>PCONVERGE=1E-006(ABSOLUTE)<br>SINGULAR=1E-012<br>ANALYSISTYPE=3(WALD)<br>CILEVEL=95<br>LIKELIHOOD=FULL<br>/EMMEANS<br>TABLES=Intervention<br>SCALE=ORIGINAL<br>/REPEATED SUBJECT=Team<br>WITHINSUBJECT=Player<br>SORT=YES<br>CORRTYPE=INDEPENDENT<br>ADJUSTCORR=YES<br>COVB=ROBUST<br>MAXITERATIONS=100<br>PCONVERGE=1e-006(ABSOLUTE)<br>UPDATECORR=1<br>/MISSING<br>CLASSMISSING=EXCLUDE<br>/PRINT CPS DESCRIPTIVES<br>MODELINFO SUMMARY<br>SOLUTION (EXPONENTIATED). |             |
| Resources | Processor Time                                                                                                                                                                                                                                                                                                                                                                                                                                                                                                                                                                                                                                                                              | 00:00:00.10 |
|           | Elapsed Time                                                                                                                                                                                                                                                                                                                                                                                                                                                                                                                                                                                                                                                                                | 00:00:00.00 |

### Model Information

|                                      |             |
|--------------------------------------|-------------|
| Dependent Variable                   | LowBack     |
| Probability Distribution             | Poisson     |
| Link Function                        | Log         |
| Subject Effect                       | 1 Team      |
| Within-Subject Effect                | 1 Player    |
| Working Correlation Matrix Structure | Independent |

### Case Processing Summary

|          | N  | Percent |
|----------|----|---------|
| Included | 94 | 100.0%  |
| Excluded | 0  | 0.0%    |
| Total    | 94 | 100.0%  |

### Correlated Data Summary

|                                    |                       |        |    |
|------------------------------------|-----------------------|--------|----|
| Number of Levels                   | Subject Effect        | Team   | 6  |
|                                    | Within-Subject Effect | Player | 94 |
| Number of Subjects                 |                       |        | 6  |
| Number of Measurements per Subject | Minimum               |        | 13 |
|                                    | Maximum               |        | 20 |
| Correlation Matrix Dimension       |                       |        | 94 |

### Categorical Variable Information

| Factor | Intervention | N  | Percent |
|--------|--------------|----|---------|
|        | Control      | 47 | 50.0%   |
|        | Intervention | 47 | 50.0%   |

|       |    |        |
|-------|----|--------|
| Total | 94 | 100.0% |
|-------|----|--------|

**Continuous Variable Information**

| Dependent Variable | LowBack | N  | Minimum | Maximum | Mean | Std. Deviation |
|--------------------|---------|----|---------|---------|------|----------------|
|                    |         | 94 | 0       | 1       | .04  | .203           |

**Tests of Model Effects**

| Source       | Wald Chi-Square | Type III df | Sig. |
|--------------|-----------------|-------------|------|
| (Intercept)  | 36.467          | 1           | .000 |
| Intervention | 2.100           | 1           | .147 |

Dependent Variable: LowBack  
Model: (Intercept), Intervention

**Parameter Estimates**

| Parameter        | B              | Std. Error | 95% Wald Confidence Interval |        | Hypothesis Test |    |      | Exp(B) |
|------------------|----------------|------------|------------------------------|--------|-----------------|----|------|--------|
|                  |                |            | Lower                        | Upper  | Wald Chi-Square | df | Sig. |        |
| (Intercept)      | -3.850         | .8653      | -5.546                       | -2.154 | 19.798          | 1  | .000 | .021   |
| [Intervention=0] | 1.099          | .7580      | -.387                        | 2.584  | 2.100           | 1  | .147 | 3.000  |
| [Intervention=1] | 0 <sup>a</sup> | .          | .                            | .      | .               | .  | .    | 1      |
| (Scale)          | 1              |            |                              |        |                 |    |      |        |

**Parameter Estimates**

| Parameter        | 95% Wald Confidence Interval for Exp(B) |        |
|------------------|-----------------------------------------|--------|
|                  | Lower                                   | Upper  |
| (Intercept)      |                                         | .116   |
| [Intervention=0] |                                         | 13.254 |
| [Intervention=1] |                                         | .      |
| (Scale)          |                                         |        |

Dependent Variable: LowBack  
Model: (Intercept), Intervention

a. Set to zero because this parameter is redundant.

**Estimated Marginal Means: Intervention**

| Intervention | Mean | Std. Error | 95% Wald Confidence Interval |       |
|--------------|------|------------|------------------------------|-------|
|              |      |            | Lower                        | Upper |
| Control      | .06  | .024       | .03                          | .13   |
| Intervention | .02  | .018       | .00                          | .12   |

\* Generalized Estimating Equations.

GENLIN Hip BY Intervention (ORDER=ASCENDING)

/MODEL Intervention INTERCEPT=YES

DISTRIBUTION=POISSON LINK=LOG

/CRITERIA METHOD=FISHER(1) SCALE=1 MAXITERATIONS=100 MAXSTEPHALVING=5

PCONVERGE=1E-006(ABSOLUTE)

SINGULAR=1E-012 ANALYSISTYPE=3(WALD) CILEVEL=95 LIKELIHOOD=FULL

/EMMEANS TABLES=Intervention SCALE=ORIGINAL

/REPEATED SUBJECT=Team WITHINSUBJECT=Player SORT=YES CORRTYPE=INDEPENDENT ADJUSTCORR=YES

COVB=ROBUST MAXITERATIONS=100 PCONVERGE=1e-006(ABSOLUTE) UPDATECORR=1

/MISSING CLASSMISSING=EXCLUDE

/PRINT CPS DESCRIPTIVES MODELINFO SUMMARY SOLUTION (EXPONENTIATED).

## Generalized Linear Models

| Notes                  |                                | 23-OCT-2020 20:38:34                                                                                                                                                                                                                                                                                                                                                                                                                                                                                                                                                                                                              |
|------------------------|--------------------------------|-----------------------------------------------------------------------------------------------------------------------------------------------------------------------------------------------------------------------------------------------------------------------------------------------------------------------------------------------------------------------------------------------------------------------------------------------------------------------------------------------------------------------------------------------------------------------------------------------------------------------------------|
| Output Created         |                                |                                                                                                                                                                                                                                                                                                                                                                                                                                                                                                                                                                                                                                   |
| Comments               |                                |                                                                                                                                                                                                                                                                                                                                                                                                                                                                                                                                                                                                                                   |
| Input                  | Data                           | /Users//OneDrive - /RCT<br>Study/Kids<br>RCT/Kids_RCT_final.sav                                                                                                                                                                                                                                                                                                                                                                                                                                                                                                                                                                   |
|                        | Active Dataset                 | DataSet1                                                                                                                                                                                                                                                                                                                                                                                                                                                                                                                                                                                                                          |
|                        | Filter                         | <none>                                                                                                                                                                                                                                                                                                                                                                                                                                                                                                                                                                                                                            |
|                        | Weight                         | <none>                                                                                                                                                                                                                                                                                                                                                                                                                                                                                                                                                                                                                            |
|                        | Split File                     | <none>                                                                                                                                                                                                                                                                                                                                                                                                                                                                                                                                                                                                                            |
|                        | N of Rows in Working Data File | 94                                                                                                                                                                                                                                                                                                                                                                                                                                                                                                                                                                                                                                |
| Missing Value Handling | Definition of Missing          | User-defined missing values for factor, subject and within-subject variables are treated as missing.                                                                                                                                                                                                                                                                                                                                                                                                                                                                                                                              |
|                        | Cases Used                     | Statistics are based on cases with valid data for all variables in the model.                                                                                                                                                                                                                                                                                                                                                                                                                                                                                                                                                     |
| Weight Handling        |                                | not applicable                                                                                                                                                                                                                                                                                                                                                                                                                                                                                                                                                                                                                    |
| Syntax                 |                                | <pre> GENLIN Hip BY Intervention (ORDER=ASCENDING)   /MODEL Intervention INTERCEPT=YES DISTRIBUTION=POISSON LINK=LOG   /CRITERIA METHOD=FISHER(1) SCALE=1 MAXITERATIONS=100 MAXSTEPHALVING=5 PCONVERGE=1E-006(ABSOLUTE)   SINGULAR=1E-012 ANALYSISTYPE=3(WALD) CILEVEL=95 LIKELIHOOD=FULL   /EMMEANS TABLES=Intervention SCALE=ORIGINAL   /REPEATED SUBJECT=Team WITHINSUBJECT=Player SORT=YES CORRTYPE=INDEPENDENT ADJUSTCORR=YES   COVB=ROBUST MAXITERATIONS=100 PCONVERGE=1e-006(ABSOLUTE) UPDATECORR=1   /MISSING CLASSMISSING=EXCLUDE   /PRINT CPS DESCRIPTIVES MODELINFO SUMMARY SOLUTION (EXPONENTIATED).           </pre> |
| Resources              | Processor Time                 | 00:00:00.09                                                                                                                                                                                                                                                                                                                                                                                                                                                                                                                                                                                                                       |
|                        | Elapsed Time                   | 00:00:00.00                                                                                                                                                                                                                                                                                                                                                                                                                                                                                                                                                                                                                       |

### Model Information

|                          |   |         |
|--------------------------|---|---------|
| Dependent Variable       |   | Hip     |
| Probability Distribution |   | Poisson |
| Link Function            |   | Log     |
| Subject Effect           | 1 | Team    |
| Within-Subject Effect    | 1 | Player  |

**Case Processing Summary**

|          | N  | Percent |
|----------|----|---------|
| Included | 94 | 100.0%  |
| Excluded | 0  | 0.0%    |
| Total    | 94 | 100.0%  |

**Correlated Data Summary**

|                                    |                       |        |    |
|------------------------------------|-----------------------|--------|----|
| Number of Levels                   | Subject Effect        | Team   | 6  |
|                                    | Within-Subject Effect | Player | 94 |
| Number of Subjects                 |                       |        | 6  |
| Number of Measurements per Subject | Minimum               |        | 13 |
|                                    | Maximum               |        | 20 |
| Correlation Matrix Dimension       |                       |        | 94 |

**Categorical Variable Information**

| Factor | Intervention |  | N  | Percent |
|--------|--------------|--|----|---------|
|        | Control      |  | 47 | 50.0%   |
|        | Intervention |  | 47 | 50.0%   |
|        | Total        |  | 94 | 100.0%  |

**Continuous Variable Information**

| Dependent Variable |  | N  | Minimum | Maximum | Mean | Std. Deviation |
|--------------------|--|----|---------|---------|------|----------------|
| Hip                |  | 94 | 0       | 1       | .04  | .203           |

**Tests of Model Effects**

| Source       | Wald Chi-Square | Type III df | Sig. |
|--------------|-----------------|-------------|------|
| (Intercept)  | 22.773          | 1           | .000 |
| Intervention | 5.606           | 1           | .018 |

Dependent Variable: Hip  
Model: (Intercept), Intervention

**Parameter Estimates**

| Parameter        | B              | Std. Error | 95% Wald Confidence Interval |        | Hypothesis Test |    |      | Exp(B) |
|------------------|----------------|------------|------------------------------|--------|-----------------|----|------|--------|
|                  |                |            | Lower                        | Upper  | Wald Chi-Square | df | Sig. |        |
| (Intercept)      | -3.850         | .8653      | -5.546                       | -2.154 | 19.798          | 1  | .000 | .021   |
| [Intervention=0] | 1.099          | .4640      | .189                         | 2.008  | 5.606           | 1  | .018 | 3.000  |
| [Intervention=1] | 0 <sup>a</sup> | .          | .                            | .      | .               | .  | .    | 1      |
| (Scale)          | 1              |            |                              |        |                 |    |      |        |

**Parameter Estimates**

| Parameter        | 95% Wald Confidence Interval for Exp(B) |       |
|------------------|-----------------------------------------|-------|
|                  | Lower                                   | Upper |
| (Intercept)      | .004                                    | .116  |
| [Intervention=0] | 1.208                                   | 7.448 |
| [Intervention=1] | .                                       | .     |
| (Scale)          |                                         |       |

Dependent Variable: Hip  
Model: (Intercept), Intervention  
a. Set to zero because this parameter is redundant.

**Estimated Marginal Means: Intervention**

| Intervention | Estimates |            |       | 95% Wald Confidence Interval |     |
|--------------|-----------|------------|-------|------------------------------|-----|
|              | Mean      | Std. Error | Lower | Upper                        |     |
| Control      | .06       | .036       | .02   |                              | .19 |
| Intervention | .02       | .018       | .00   |                              | .12 |

\* Generalized Estimating Equations.

GENLIN Quadriceps BY Intervention (ORDER=ASCENDING)

/MODEL Intervention INTERCEPT=YES

DISTRIBUTION=POISSON LINK=LOG

/CRITERIA METHOD=FISHER(1) SCALE=1 MAXITERATIONS=100 MAXSTEPHALVING=5

PCONVERGE=1E-006(ABSOLUTE)

SINGULAR=1E-012 ANALYSISTYPE=3(WALD) CILEVEL=95 LIKELIHOOD=FULL

/EMMEANS TABLES=Intervention SCALE=ORIGINAL

/REPEATED SUBJECT=Team WITHINSUBJECT=Player SORT=YES CORRTYPE=INDEPENDENT ADJUSTCORR=YES

COVB=ROBUST MAXITERATIONS=100 PCONVERGE=1e-006(ABSOLUTE) UPDATECORR=1

/MISSING CLASSMISSING=EXCLUDE

/PRINT CPS DESCRIPTIVES MODELINFO SUMMARY SOLUTION (EXPONENTIATED).

## Generalized Linear Models

| Notes                  |                                |                                                                                                      |
|------------------------|--------------------------------|------------------------------------------------------------------------------------------------------|
| Output Created         |                                | 23-OCT-2020 20:39:01                                                                                 |
| Comments               |                                |                                                                                                      |
| Input                  | Data                           | /Users//OneDrive - /RCT<br>Study/Kids<br>RCT/Kids_RCT_final.sav                                      |
|                        | Active Dataset                 | DataSet1                                                                                             |
|                        | Filter                         | <none>                                                                                               |
|                        | Weight                         | <none>                                                                                               |
|                        | Split File                     | <none>                                                                                               |
|                        | N of Rows in Working Data File | 94                                                                                                   |
| Missing Value Handling | Definition of Missing          | User-defined missing values for factor, subject and within-subject variables are treated as missing. |
|                        | Cases Used                     | Statistics are based on cases with valid data for all variables in the model.                        |
| Weight Handling        |                                | not applicable                                                                                       |

|           |                                                                                                                                                                                                                                                                                                                                                                                                                                                                                                                                                                                                                                                                                                   |             |
|-----------|---------------------------------------------------------------------------------------------------------------------------------------------------------------------------------------------------------------------------------------------------------------------------------------------------------------------------------------------------------------------------------------------------------------------------------------------------------------------------------------------------------------------------------------------------------------------------------------------------------------------------------------------------------------------------------------------------|-------------|
| Syntax    | GENLIN Quadriceps BY<br>Intervention<br>(ORDER=ASCENDING)<br>/MODEL Intervention<br>INTERCEPT=YES<br>DISTRIBUTION=POISSON<br>LINK=LOG<br>/CRITERIA<br>METHOD=FISHER(1) SCALE=1<br>MAXITERATIONS=100<br>MAXSTEPHALVING=5<br>PCONVERGE=1E-006(ABSOLUTE)<br>SINGULAR=1E-012<br>ANALYSISTYPE=3(WALD)<br>CILEVEL=95<br>LIKELIHOOD=FULL<br>/EMMEANS<br>TABLES=Intervention<br>SCALE=ORIGINAL<br>/REPEATED SUBJECT=Team<br>WITHINSUBJECT=Player<br>SORT=YES<br>CORRTYPE=INDEPENDENT<br>ADJUSTCORR=YES<br>COVB=ROBUST<br>MAXITERATIONS=100<br>PCONVERGE=1e-006(ABSOLUTE)<br>UPDATECORR=1<br>/MISSING<br>CLASSMISSING=EXCLUDE<br>/PRINT CPS DESCRIPTIVES<br>MODELINFO SUMMARY<br>SOLUTION (EXPONENTIATED). |             |
| Resources | Processor Time                                                                                                                                                                                                                                                                                                                                                                                                                                                                                                                                                                                                                                                                                    | 00:00:00.09 |
|           | Elapsed Time                                                                                                                                                                                                                                                                                                                                                                                                                                                                                                                                                                                                                                                                                      | 00:00:00.00 |

### Model Information

|                                      |             |
|--------------------------------------|-------------|
| Dependent Variable                   | Quadriceps  |
| Probability Distribution             | Poisson     |
| Link Function                        | Log         |
| Subject Effect                       | 1<br>Team   |
| Within-Subject Effect                | 1<br>Player |
| Working Correlation Matrix Structure | Independent |

### Case Processing Summary

|          | N  | Percent |
|----------|----|---------|
| Included | 94 | 100.0%  |
| Excluded | 0  | 0.0%    |
| Total    | 94 | 100.0%  |

### Correlated Data Summary

|                                    |                       |        |    |
|------------------------------------|-----------------------|--------|----|
| Number of Levels                   | Subject Effect        | Team   | 6  |
|                                    | Within-Subject Effect | Player | 94 |
| Number of Subjects                 |                       |        | 6  |
| Number of Measurements per Subject | Minimum               |        | 13 |
|                                    | Maximum               |        | 20 |
| Correlation Matrix Dimension       |                       |        | 94 |

### Categorical Variable Information

| Factor       |         | N  | Percent |
|--------------|---------|----|---------|
| Intervention | Control | 47 | 50.0%   |



|              |    |        |
|--------------|----|--------|
| Intervention | 47 | 50.0%  |
| Total        | 94 | 100.0% |

**Continuous Variable Information**

| Dependent Variable | Quadriceps | N  | Minimum | Maximum | Mean | Std. Deviation |
|--------------------|------------|----|---------|---------|------|----------------|
|                    |            | 94 | 0       | 1       | .07  | .264           |

**Tests of Model Effects**

| Source       | Wald Chi-Square | Type III df | Sig. |
|--------------|-----------------|-------------|------|
| (Intercept)  | 84.371          | 1           | .000 |
| Intervention | 1.591           | 1           | .207 |

Dependent Variable: Quadriceps  
Model: (Intercept), Intervention

**Parameter Estimates**

| Parameter        | B              | Std. Error | 95% Wald Confidence Interval |        | Hypothesis Test |    |      | Exp(B) |
|------------------|----------------|------------|------------------------------|--------|-----------------|----|------|--------|
|                  |                |            | Lower                        | Upper  | Wald Chi-Square | df | Sig. |        |
| (Intercept)      | -3.157         | .5778      | -4.289                       | -2.025 | 29.853          | 1  | .000 | .043   |
| [Intervention=0] | .916           | .7264      | -.507                        | 2.340  | 1.591           | 1  | .207 | 2.500  |
| [Intervention=1] | 0 <sup>a</sup> | .          | .                            | .      | .               | .  | .    | 1      |
| (Scale)          | 1              |            |                              |        |                 |    |      |        |

**Parameter Estimates**

| Parameter        | 95% Wald Confidence Interval for Exp(B) |        |
|------------------|-----------------------------------------|--------|
|                  | Lower                                   | Upper  |
| (Intercept)      | .014                                    | .132   |
| [Intervention=0] | .602                                    | 10.381 |
| [Intervention=1] | .                                       | .      |
| (Scale)          |                                         |        |

Dependent Variable: Quadriceps  
Model: (Intercept), Intervention

a. Set to zero because this parameter is redundant.

**Estimated Marginal Means: Intervention**

| Intervention | Mean | Std. Error | 95% Wald Confidence Interval |       |
|--------------|------|------------|------------------------------|-------|
|              |      |            | Lower                        | Upper |
| Control      | .11  | .034       | .06                          | .20   |
| Intervention | .04  | .025       | .01                          | .13   |

\* Generalized Estimating Equations.

GENLIN Hamstring BY Intervention (ORDER=ASCENDING)

/MODEL Intervention INTERCEPT=YES

DISTRIBUTION=POISSON LINK=LOG

/CRITERIA METHOD=FISHER(1) SCALE=1 MAXITERATIONS=100 MAXSTEPHALVING=5

PCONVERGE=1E-006(Absolute)

SINGULAR=1E-012 ANALYSISTYPE=3(WALD) CILEVEL=95 LIKELIHOOD=FULL

/EMMEANS TABLES=Intervention SCALE=ORIGINAL

/REPEATED SUBJECT=Team WITHINSUBJECT=Player SORT=YES CORRTYPE=INDEPENDENT ADJUSTCORR=YES

COVB=ROBUST MAXITERATIONS=100 PCONVERGE=1e-006(Absolute) UPDATECORR=1

/MISSING CLASSMISSING=EXCLUDE

/PRINT CPS DESCRIPTIVES MODELINFO SUMMARY SOLUTION (EXPONENTIATED).

## Generalized Linear Models

| <b>Notes</b>           |                                | 23-OCT-2020 20:39:16                                                                                                                                                                                                                                                                                                                                                                                                                                                                                                                                                                                                                                                                             |
|------------------------|--------------------------------|--------------------------------------------------------------------------------------------------------------------------------------------------------------------------------------------------------------------------------------------------------------------------------------------------------------------------------------------------------------------------------------------------------------------------------------------------------------------------------------------------------------------------------------------------------------------------------------------------------------------------------------------------------------------------------------------------|
| Output Created         |                                |                                                                                                                                                                                                                                                                                                                                                                                                                                                                                                                                                                                                                                                                                                  |
| Comments               |                                |                                                                                                                                                                                                                                                                                                                                                                                                                                                                                                                                                                                                                                                                                                  |
| Input                  | Data                           | /Users//OneDrive - /RCT<br>Study/Kids<br>RCT/Kids_RCT_final.sav                                                                                                                                                                                                                                                                                                                                                                                                                                                                                                                                                                                                                                  |
|                        | Active Dataset                 | DataSet1                                                                                                                                                                                                                                                                                                                                                                                                                                                                                                                                                                                                                                                                                         |
|                        | Filter                         | <none>                                                                                                                                                                                                                                                                                                                                                                                                                                                                                                                                                                                                                                                                                           |
|                        | Weight                         | <none>                                                                                                                                                                                                                                                                                                                                                                                                                                                                                                                                                                                                                                                                                           |
|                        | Split File                     | <none>                                                                                                                                                                                                                                                                                                                                                                                                                                                                                                                                                                                                                                                                                           |
|                        | N of Rows in Working Data File | 94                                                                                                                                                                                                                                                                                                                                                                                                                                                                                                                                                                                                                                                                                               |
| Missing Value Handling | Definition of Missing          | User-defined missing values for factor, subject and within-subject variables are treated as missing.                                                                                                                                                                                                                                                                                                                                                                                                                                                                                                                                                                                             |
|                        | Cases Used                     | Statistics are based on cases with valid data for all variables in the model.                                                                                                                                                                                                                                                                                                                                                                                                                                                                                                                                                                                                                    |
| Weight Handling        |                                | not applicable                                                                                                                                                                                                                                                                                                                                                                                                                                                                                                                                                                                                                                                                                   |
| Syntax                 |                                | GENLIN Hamstring BY<br>Intervention<br>(ORDER=ASCENDING)<br>/MODEL Intervention<br>INTERCEPT=YES<br>DISTRIBUTION=POISSON<br>LINK=LOG<br>/CRITERIA<br>METHOD=FISHER(1) SCALE=1<br>MAXITERATIONS=100<br>MAXSTEPHALVING=5<br>PCONVERGE=1E-006(ABSOLUTE)<br>SINGULAR=1E-012<br>ANALYSISTYPE=3(WALD)<br>CILEVEL=95<br>LIKELIHOOD=FULL<br>/EMMEANS<br>TABLES=Intervention<br>SCALE=ORIGINAL<br>/REPEATED SUBJECT=Team<br>WITHINSUBJECT=Player<br>SORT=YES<br>CORRTYPE=INDEPENDENT<br>ADJUSTCORR=YES<br>COVB=ROBUST<br>MAXITERATIONS=100<br>PCONVERGE=1e-006(ABSOLUTE)<br>UPDATECORR=1<br>/MISSING<br>CLASSMISSING=EXCLUDE<br>/PRINT CPS DESCRIPTIVES<br>MODELINFO SUMMARY<br>SOLUTION (EXPONENTIATED). |
| Resources              | Processor Time                 | 00:00:00.09                                                                                                                                                                                                                                                                                                                                                                                                                                                                                                                                                                                                                                                                                      |
|                        | Elapsed Time                   | 00:00:00.00                                                                                                                                                                                                                                                                                                                                                                                                                                                                                                                                                                                                                                                                                      |

### Model Information

|                          |           |
|--------------------------|-----------|
| Dependent Variable       | Hamstring |
| Probability Distribution | Poisson   |
| Link Function            | Log       |

|                                      |   |             |
|--------------------------------------|---|-------------|
| Subject Effect                       | 1 | Team        |
| Within-Subject Effect                | 1 | Player      |
| Working Correlation Matrix Structure |   | Independent |

### Case Processing Summary

|          | N  | Percent |
|----------|----|---------|
| Included | 94 | 100.0%  |
| Excluded | 0  | 0.0%    |
| Total    | 94 | 100.0%  |

### Correlated Data Summary

|                                    |                       |        |    |
|------------------------------------|-----------------------|--------|----|
| Number of Levels                   | Subject Effect        | Team   | 6  |
|                                    | Within-Subject Effect | Player | 94 |
| Number of Subjects                 |                       |        | 6  |
| Number of Measurements per Subject | Minimum               |        | 13 |
|                                    | Maximum               |        | 20 |
| Correlation Matrix Dimension       |                       |        | 94 |

### Categorical Variable Information

| Factor | Intervention |  | N  | Percent |
|--------|--------------|--|----|---------|
|        | Control      |  | 47 | 50.0%   |
|        | Intervention |  | 47 | 50.0%   |
|        | Total        |  | 94 | 100.0%  |

### Continuous Variable Information

| Dependent Variable |  | N  | Minimum | Maximum | Mean | Std. Deviation |
|--------------------|--|----|---------|---------|------|----------------|
| Hamstring          |  | 94 | 0       | 1       | .06  | .246           |

### Tests of Model Effects

| Source       | Wald Chi-Square | Type III df | Sig. |
|--------------|-----------------|-------------|------|
| (Intercept)  | 80.070          | 1           | .000 |
| Intervention | .830            | 1           | .362 |

Dependent Variable: Hamstring  
Model: (Intercept), Intervention

### Parameter Estimates

| Parameter        | B              | Std. Error | 95% Wald Confidence Interval |        | Hypothesis Test |    |      | Exp(B) |
|------------------|----------------|------------|------------------------------|--------|-----------------|----|------|--------|
|                  |                |            | Lower                        | Upper  | Wald Chi-Square | df | Sig. |        |
| (Intercept)      | -3.157         | .5778      | -4.289                       | -2.025 | 29.853          | 1  | .000 | .043   |
| [Intervention=0] | .693           | .7610      | -.798                        | 2.185  | .830            | 1  | .362 | 2.000  |
| [Intervention=1] | 0 <sup>a</sup> | .          | .                            | .      | .               | .  | .    | 1      |
| (Scale)          | 1              |            |                              |        |                 |    |      |        |

### Parameter Estimates

| Parameter        | 95% Wald Confidence Interval for Exp(B) |       |
|------------------|-----------------------------------------|-------|
|                  | Lower                                   | Upper |
| (Intercept)      | .014                                    | .132  |
| [Intervention=0] | .450                                    | 8.887 |
| [Intervention=1] | .                                       | .     |
| (Scale)          |                                         |       |

Dependent Variable: Hamstring  
Model: (Intercept), Intervention

a. Set to zero because this parameter is redundant.

## Estimated Marginal Means: Intervention

| Intervention | Mean | Std. Error | Estimates |       |
|--------------|------|------------|-----------|-------|
|              |      |            | Lower     | Upper |
| Control      | .09  | .033       | .04       | .18   |
| Intervention | .04  | .025       | .01       | .13   |

\* Generalized Estimating Equations.

GENLIN Knee BY Intervention (ORDER=ASCENDING)

/MODEL Intervention INTERCEPT=YES

DISTRIBUTION=POISSON LINK=LOG

/CRITERIA METHOD=FISHER(1) SCALE=1 MAXITERATIONS=100 MAXSTEPHALVING=5

PCONVERGE=1E-006(ABSOLUTE)

SINGULAR=1E-012 ANALYSISTYPE=3(WALD) CILEVEL=95 LIKELIHOOD=FULL

/EMMEANS TABLES=Intervention SCALE=ORIGINAL

/REPEATED SUBJECT=Team WITHINSUBJECT=Player SORT=YES CORRTYPE=INDEPENDENT ADJUSTCORR=YES

COVB=ROBUST MAXITERATIONS=100 PCONVERGE=1e-006(ABSOLUTE) UPDATECORR=1

/MISSING CLASSMISSING=EXCLUDE

/PRINT CPS DESCRIPTIVES MODELINFO SUMMARY SOLUTION (EXPONENTIATED).

## Generalized Linear Models

| Notes                  |                                |                                                                                                      |
|------------------------|--------------------------------|------------------------------------------------------------------------------------------------------|
| Output Created         |                                | 23-OCT-2020 20:39:35                                                                                 |
| Comments               |                                |                                                                                                      |
| Input                  | Data                           | /Users//OneDrive - /RCT<br>Study/Kids<br>RCT/Kids_RCT_final.sav                                      |
|                        | Active Dataset                 | DataSet1                                                                                             |
|                        | Filter                         | <none>                                                                                               |
|                        | Weight                         | <none>                                                                                               |
|                        | Split File                     | <none>                                                                                               |
|                        | N of Rows in Working Data File | 94                                                                                                   |
| Missing Value Handling | Definition of Missing          | User-defined missing values for factor, subject and within-subject variables are treated as missing. |
|                        | Cases Used                     | Statistics are based on cases with valid data for all variables in the model.                        |
| Weight Handling        |                                | not applicable                                                                                       |

|           |                                                                                                                                                                                                                                                                                                                                                                                                                                                                                                                                                                                                                          |             |
|-----------|--------------------------------------------------------------------------------------------------------------------------------------------------------------------------------------------------------------------------------------------------------------------------------------------------------------------------------------------------------------------------------------------------------------------------------------------------------------------------------------------------------------------------------------------------------------------------------------------------------------------------|-------------|
| Syntax    | <pre> GENLIN Knee BY Intervention (ORDER=ASCENDING)   /MODEL Intervention INTERCEPT=YES DISTRIBUTION=POISSON LINK=LOG   /CRITERIA METHOD=FISHER(1) SCALE=1 MAXITERATIONS=100 MAXSTEPHALVING=5 PCONVERGE=1E-006(ABSOLUTE)   SINGULAR=1E-012 ANALYSISTYPE=3(WALD) CILEVEL=95 LIKELIHOOD=FULL   /EMMEANS TABLES=Intervention SCALE=ORIGINAL   /REPEATED SUBJECT=Team WITHINSUBJECT=Player SORT=YES CORRTYPE=INDEPENDENT ADJUSTCORR=YES   COVB=ROBUST MAXITERATIONS=100 PCONVERGE=1e-006(ABSOLUTE) UPDATECORR=1   /MISSING CLASSMISSING=EXCLUDE   /PRINT CPS DESCRIPTIVES MODELINFO SUMMARY SOLUTION (EXPONENTIATED). </pre> |             |
| Resources | Processor Time                                                                                                                                                                                                                                                                                                                                                                                                                                                                                                                                                                                                           | 00:00:00.10 |
|           | Elapsed Time                                                                                                                                                                                                                                                                                                                                                                                                                                                                                                                                                                                                             | 00:00:00.00 |

### Model Information

|                                      |   |             |
|--------------------------------------|---|-------------|
| Dependent Variable                   |   | Knee        |
| Probability Distribution             |   | Poisson     |
| Link Function                        |   | Log         |
| Subject Effect                       | 1 | Team        |
| Within-Subject Effect                | 1 | Player      |
| Working Correlation Matrix Structure |   | Independent |

### Case Processing Summary

|          | N  | Percent |
|----------|----|---------|
| Included | 94 | 100.0%  |
| Excluded | 0  | 0.0%    |
| Total    | 94 | 100.0%  |

### Correlated Data Summary

|                                    |                       |        |    |
|------------------------------------|-----------------------|--------|----|
| Number of Levels                   | Subject Effect        | Team   | 6  |
|                                    | Within-Subject Effect | Player | 94 |
| Number of Subjects                 |                       |        | 6  |
| Number of Measurements per Subject | Minimum               |        | 13 |
|                                    | Maximum               |        | 20 |
| Correlation Matrix Dimension       |                       |        | 94 |

### Categorical Variable Information

| Factor | Intervention |  | N  | Percent |
|--------|--------------|--|----|---------|
|        | Control      |  | 47 | 50.0%   |
|        | Intervention |  | 47 | 50.0%   |

|       |    |        |
|-------|----|--------|
| Total | 94 | 100.0% |
|-------|----|--------|

### Continuous Variable Information

| Dependent Variable | Knee | N  | Minimum | Maximum | Mean | Std. Deviation |
|--------------------|------|----|---------|---------|------|----------------|
|                    |      | 94 | 0       | 2       | .32  | .491           |

### Tests of Model Effects

| Source       | Wald Chi-Square | Type III df | Sig. |
|--------------|-----------------|-------------|------|
| (Intercept)  | 108.675         | 1           | .000 |
| Intervention | 7.134           | 1           | .008 |

Dependent Variable: Knee  
Model: (Intercept), Intervention

### Parameter Estimates

| Parameter        | B              | Std. Error | 95% Wald Confidence Interval |        | Hypothesis Test |    |      | Exp(B) |
|------------------|----------------|------------|------------------------------|--------|-----------------|----|------|--------|
|                  |                |            | Lower                        | Upper  | Wald Chi-Square | df | Sig. |        |
| (Intercept)      | -1.548         | .2027      | -1.945                       | -1.150 | 58.278          | 1  | .000 | .213   |
| [Intervention=0] | .693           | .2595      | .185                         | 1.202  | 7.134           | 1  | .008 | 2.000  |
| [Intervention=1] | 0 <sup>a</sup> | .          | .                            | .      | .               | .  | .    | 1      |
| (Scale)          | 1              |            |                              |        |                 |    |      |        |

### Parameter Estimates

| Parameter        | 95% Wald Confidence Interval for Exp(B) |       |
|------------------|-----------------------------------------|-------|
|                  | Lower                                   | Upper |
| (Intercept)      | .143                                    | .317  |
| [Intervention=0] | 1.203                                   | 3.326 |
| [Intervention=1] | .                                       | .     |
| (Scale)          |                                         |       |

Dependent Variable: Knee  
Model: (Intercept), Intervention

a. Set to zero because this parameter is redundant.

### Estimated Marginal Means: Intervention

| Intervention | Mean | Std. Error | 95% Wald Confidence Interval |       |
|--------------|------|------------|------------------------------|-------|
|              |      |            | Lower                        | Upper |
| Control      | .43  | .059       | .32                          | .56   |
| Intervention | .21  | .043       | .14                          | .32   |

\* Generalized Estimating Equations.

GENLIN Lower\_leg BY Intervention (ORDER=ASCENDING)

/MODEL Intervention INTERCEPT=YES

DISTRIBUTION=POISSON LINK=LOG

/CRITERIA METHOD=FISHER(1) SCALE=1 MAXITERATIONS=100 MAXSTEPHALVING=5

PCONVERGE=1E-006(ABSOLUTE)

SINGULAR=1E-012 ANALYSISTYPE=3(WALD) CILEVEL=95 LIKELIHOOD=FULL

/EMMEANS TABLES=Intervention SCALE=ORIGINAL

/REPEATED SUBJECT=Team WITHINSUBJECT=Player SORT=YES CORRTYPE=INDEPENDENT ADJUSTCORR=YES

COVB=ROBUST MAXITERATIONS=100 PCONVERGE=1e-006(ABSOLUTE) UPDATECORR=1

/MISSING CLASSMISSING=EXCLUDE

/PRINT CPS DESCRIPTIVES MODELINFO SUMMARY SOLUTION (EXPONENTIATED).

## Generalized Linear Models

| Notes                  |                                | 23-OCT-2020 20:39:52                                                                                                                                                                                                                                                                                                                                                                                                                                                                                                                                                                                                                                                                                |
|------------------------|--------------------------------|-----------------------------------------------------------------------------------------------------------------------------------------------------------------------------------------------------------------------------------------------------------------------------------------------------------------------------------------------------------------------------------------------------------------------------------------------------------------------------------------------------------------------------------------------------------------------------------------------------------------------------------------------------------------------------------------------------|
| Output Created         |                                |                                                                                                                                                                                                                                                                                                                                                                                                                                                                                                                                                                                                                                                                                                     |
| Comments               |                                |                                                                                                                                                                                                                                                                                                                                                                                                                                                                                                                                                                                                                                                                                                     |
| Input                  | Data                           | /Users//OneDrive - /RCT<br>Study/Kids<br>RCT/Kids_RCT_final.sav                                                                                                                                                                                                                                                                                                                                                                                                                                                                                                                                                                                                                                     |
|                        | Active Dataset                 | DataSet1                                                                                                                                                                                                                                                                                                                                                                                                                                                                                                                                                                                                                                                                                            |
|                        | Filter                         | <none>                                                                                                                                                                                                                                                                                                                                                                                                                                                                                                                                                                                                                                                                                              |
|                        | Weight                         | <none>                                                                                                                                                                                                                                                                                                                                                                                                                                                                                                                                                                                                                                                                                              |
|                        | Split File                     | <none>                                                                                                                                                                                                                                                                                                                                                                                                                                                                                                                                                                                                                                                                                              |
|                        | N of Rows in Working Data File | 94                                                                                                                                                                                                                                                                                                                                                                                                                                                                                                                                                                                                                                                                                                  |
| Missing Value Handling | Definition of Missing          | User-defined missing values for factor, subject and within-subject variables are treated as missing.                                                                                                                                                                                                                                                                                                                                                                                                                                                                                                                                                                                                |
|                        | Cases Used                     | Statistics are based on cases with valid data for all variables in the model.                                                                                                                                                                                                                                                                                                                                                                                                                                                                                                                                                                                                                       |
| Weight Handling        |                                | not applicable                                                                                                                                                                                                                                                                                                                                                                                                                                                                                                                                                                                                                                                                                      |
| Syntax                 |                                | GENLIN Lower_leg BY<br>Intervention<br>(ORDER=ASCENDING)<br>/MODEL Intervention<br>INTERCEPT=YES<br>DISTRIBUTION=POISSON<br>LINK=LOG<br>/CRITERIA<br>METHOD=FISHER(1) SCALE=1<br>MAXITERATIONS=100<br>MAXSTEPHALVING=5<br>PCONVERGE=1E-006(ABSOLUTE)<br>SINGULAR=1E-012<br>ANALYSISTYPE=3(WALD)<br>CILEVEL=95<br>LIKELIHOOD=FULL<br>/EMMEANS<br>TABLES=Intervention<br>SCALE=ORIGINAL<br>/REPEATED SUBJECT=Team<br>WITHINSUBJECT=Player<br>SORT=YES<br>CORRTYPE=INDEPENDENT<br>ADJUSTCORR=YES<br>COVB=ROBUST<br>MAXITERATIONS=100<br>PCONVERGE=1e-006(ABSOLUTE)<br>E) UPDATECORR=1<br>/MISSING<br>CLASSMISSING=EXCLUDE<br>/PRINT CPS DESCRIPTIVES<br>MODELINFO SUMMARY<br>SOLUTION (EXPONENTIATED). |
| Resources              | Processor Time                 | 00:00:00.10                                                                                                                                                                                                                                                                                                                                                                                                                                                                                                                                                                                                                                                                                         |
|                        | Elapsed Time                   | 00:00:00.00                                                                                                                                                                                                                                                                                                                                                                                                                                                                                                                                                                                                                                                                                         |

### Model Information

|                          |           |
|--------------------------|-----------|
| Dependent Variable       | Lower_leg |
| Probability Distribution | Poisson   |
| Link Function            | Log       |
| Subject Effect           | 1 Team    |

|                                      |   |             |
|--------------------------------------|---|-------------|
| Within-Subject Effect                | 1 | Player      |
| Working Correlation Matrix Structure |   | Independent |

### Case Processing Summary

|          | N  | Percent |
|----------|----|---------|
| Included | 94 | 100.0%  |
| Excluded | 0  | 0.0%    |
| Total    | 94 | 100.0%  |

### Correlated Data Summary

|                                    |                       |        |    |
|------------------------------------|-----------------------|--------|----|
| Number of Levels                   | Subject Effect        | Team   | 6  |
|                                    | Within-Subject Effect | Player | 94 |
| Number of Subjects                 |                       |        | 6  |
| Number of Measurements per Subject | Minimum               |        | 13 |
|                                    | Maximum               |        | 20 |
| Correlation Matrix Dimension       |                       |        | 94 |

### Categorical Variable Information

| Factor | Intervention |  | N  | Percent |
|--------|--------------|--|----|---------|
|        | Control      |  | 47 | 50.0%   |
|        | Intervention |  | 47 | 50.0%   |
|        | Total        |  | 94 | 100.0%  |

### Continuous Variable Information

| Dependent Variable | Lower_leg | N  | Minimum | Maximum | Mean | Std. Deviation |
|--------------------|-----------|----|---------|---------|------|----------------|
|                    |           | 94 | 0       | 1       | .14  | .347           |

### Tests of Model Effects

| Source       | Wald Chi-Square | Type III df | Sig. |
|--------------|-----------------|-------------|------|
| (Intercept)  | 107.617         | 1           | .000 |
| Intervention | 16.222          | 1           | .000 |

Dependent Variable: Lower\_leg

Model: (Intercept), Intervention

### Parameter Estimates

| Parameter        | B              | Std. Error | 95% Wald Confidence Interval |        | Hypothesis Test |    |      | Exp(B) |
|------------------|----------------|------------|------------------------------|--------|-----------------|----|------|--------|
|                  |                |            | Lower                        | Upper  | Wald Chi-Square | df | Sig. |        |
| (Intercept)      | -2.464         | .2706      | -2.994                       | -1.933 | 82.905          | 1  | .000 | .085   |
| [Intervention=0] | .811           | .2013      | .416                         | 1.206  | 16.222          | 1  | .000 | 2.250  |
| [Intervention=1] | 0 <sup>a</sup> | .          | .                            | .      | .               | .  | .    | 1      |
| (Scale)          | 1              |            |                              |        |                 |    |      |        |

### Parameter Estimates

| Parameter        | 95% Wald Confidence Interval for Exp(B) |       |
|------------------|-----------------------------------------|-------|
|                  | Lower                                   | Upper |
| (Intercept)      |                                         | .145  |
| [Intervention=0] |                                         | 3.339 |
| [Intervention=1] |                                         | .     |
| (Scale)          |                                         | .     |

Dependent Variable: Lower\_leg

Model: (Intercept), Intervention

a. Set to zero because this parameter is redundant.



## Estimated Marginal Means: Intervention

| Intervention | Mean | Estimates  |       | 95% Wald Confidence Interval |  |
|--------------|------|------------|-------|------------------------------|--|
|              |      | Std. Error | Lower | Upper                        |  |
| Control      | .19  | .031       | .14   | .26                          |  |
| Intervention | .09  | .023       | .05   | .14                          |  |

\* Generalized Estimating Equations.

GENLIN Ankle BY Intervention (ORDER=ASCENDING)

/MODEL Intervention INTERCEPT=YES

DISTRIBUTION=POISSON LINK=LOG

/CRITERIA METHOD=FISHER(1) SCALE=1 MAXITERATIONS=100 MAXSTEPHALVING=5

PCONVERGE=1E-006(ABSOLUTE)

SINGULAR=1E-012 ANALYSISTYPE=3(WALD) CILEVEL=95 LIKELIHOOD=FULL

/EMMEANS TABLES=Intervention SCALE=ORIGINAL

/REPEATED SUBJECT=Team WITHINSUBJECT=Player SORT=YES CORRTYPE=INDEPENDENT ADJUSTCORR=YES

COVB=ROBUST MAXITERATIONS=100 PCONVERGE=1e-006(ABSOLUTE) UPDATECORR=1

/MISSING CLASSMISSING=EXCLUDE

/PRINT CPS DESCRIPTIVES MODELINFO SUMMARY SOLUTION (EXPONENTIATED).

## Generalized Linear Models

| Notes                  |                                |                                                                                                      |
|------------------------|--------------------------------|------------------------------------------------------------------------------------------------------|
| Output Created         |                                | 23-OCT-2020 20:40:08                                                                                 |
| Comments               |                                |                                                                                                      |
| Input                  | Data                           | /Users//OneDrive - /RCT<br>Study/Kids<br>RCT/Kids_RCT_final.sav                                      |
|                        | Active Dataset                 | DataSet1                                                                                             |
|                        | Filter                         | <none>                                                                                               |
|                        | Weight                         | <none>                                                                                               |
|                        | Split File                     | <none>                                                                                               |
|                        | N of Rows in Working Data File | 94                                                                                                   |
| Missing Value Handling | Definition of Missing          | User-defined missing values for factor, subject and within-subject variables are treated as missing. |
|                        | Cases Used                     | Statistics are based on cases with valid data for all variables in the model.                        |
| Weight Handling        |                                | not applicable                                                                                       |

|           |                                                                                                                                                                                                                                                                                                                                                                                                                                                                                                                                                                                                                                                                                           |             |
|-----------|-------------------------------------------------------------------------------------------------------------------------------------------------------------------------------------------------------------------------------------------------------------------------------------------------------------------------------------------------------------------------------------------------------------------------------------------------------------------------------------------------------------------------------------------------------------------------------------------------------------------------------------------------------------------------------------------|-------------|
| Syntax    | GENLIN Ankle BY Intervention<br>(ORDER=ASCENDING)<br>/MODEL Intervention<br>INTERCEPT=YES<br>DISTRIBUTION=POISSON<br>LINK=LOG<br>/CRITERIA<br>METHOD=FISHER(1) SCALE=1<br>MAXITERATIONS=100<br>MAXSTEPHALVING=5<br>PCONVERGE=1E-006(ABSOLUTE)<br>SINGULAR=1E-012<br>ANALYSISTYPE=3(WALD)<br>CILEVEL=95<br>LIKELIHOOD=FULL<br>/EMMEANS<br>TABLES=Intervention<br>SCALE=ORIGINAL<br>/REPEATED SUBJECT=Team<br>WITHINSUBJECT=Player<br>SORT=YES<br>CORRTYPE=INDEPENDENT<br>ADJUSTCORR=YES<br>COVB=ROBUST<br>MAXITERATIONS=100<br>PCONVERGE=1e-006(ABSOLUTE)<br>UPDATECORR=1<br>/MISSING<br>CLASSMISSING=EXCLUDE<br>/PRINT CPS DESCRIPTIVES<br>MODELINFO SUMMARY<br>SOLUTION (EXPONENTIATED). |             |
| Resources | Processor Time                                                                                                                                                                                                                                                                                                                                                                                                                                                                                                                                                                                                                                                                            | 00:00:00.08 |
|           | Elapsed Time                                                                                                                                                                                                                                                                                                                                                                                                                                                                                                                                                                                                                                                                              | 00:00:00.00 |

### Model Information

|                                      |   |             |
|--------------------------------------|---|-------------|
| Dependent Variable                   |   | Ankle       |
| Probability Distribution             |   | Poisson     |
| Link Function                        |   | Log         |
| Subject Effect                       | 1 | Team        |
| Within-Subject Effect                | 1 | Player      |
| Working Correlation Matrix Structure |   | Independent |

### Case Processing Summary

|          | N  | Percent |
|----------|----|---------|
| Included | 93 | 98.9%   |
| Excluded | 1  | 1.1%    |
| Total    | 94 | 100.0%  |

### Correlated Data Summary

|                                    |                       |        |    |
|------------------------------------|-----------------------|--------|----|
| Number of Levels                   | Subject Effect        | Team   | 6  |
|                                    | Within-Subject Effect | Player | 93 |
| Number of Subjects                 |                       |        | 6  |
| Number of Measurements per Subject | Minimum               |        | 13 |
|                                    | Maximum               |        | 20 |
| Correlation Matrix Dimension       |                       |        | 93 |

### Categorical Variable Information

|        |              | N            | Percent |
|--------|--------------|--------------|---------|
| Factor | Intervention | Control      | 47      |
|        |              | Intervention | 46      |
|        |              |              | 50.5%   |
|        |              |              | 49.5%   |

|       |    |        |
|-------|----|--------|
| Total | 93 | 100.0% |
|-------|----|--------|

**Continuous Variable Information**

| Dependent Variable | Ankle | N  | Minimum | Maximum | Mean | Std. Deviation |
|--------------------|-------|----|---------|---------|------|----------------|
|                    |       | 93 | 0       | 2       | .26  | .487           |

**Tests of Model Effects**

| Source       | Wald Chi-Square | Type III df | Sig. |
|--------------|-----------------|-------------|------|
| (Intercept)  | 64.897          | 1           | .000 |
| Intervention | 16.562          | 1           | .000 |

Dependent Variable: Ankle  
Model: (Intercept), Intervention

**Parameter Estimates**

| Parameter        | B              | Std. Error | 95% Wald Confidence Interval |        | Hypothesis Test |    |      | Exp(B) |
|------------------|----------------|------------|------------------------------|--------|-----------------|----|------|--------|
|                  |                |            | Lower                        | Upper  | Wald Chi-Square | df | Sig. |        |
| (Intercept)      | -1.749         | .2263      | -2.193                       | -1.306 | 59.740          | 1  | .000 | .174   |
| [Intervention=0] | .672           | .1650      | .348                         | .995   | 16.562          | 1  | .000 | 1.957  |
| [Intervention=1] | 0 <sup>a</sup> | .          | .                            | .      | .               | .  | .    | 1      |
| (Scale)          | 1              |            |                              |        |                 |    |      |        |

**Parameter Estimates**

| Parameter        | 95% Wald Confidence Interval for Exp(B) |       |
|------------------|-----------------------------------------|-------|
|                  | Lower                                   | Upper |
| (Intercept)      | .112                                    | .271  |
| [Intervention=0] | 1.416                                   | 2.705 |
| [Intervention=1] | .                                       | .     |
| (Scale)          |                                         |       |

Dependent Variable: Ankle  
Model: (Intercept), Intervention

a. Set to zero because this parameter is redundant.

**Estimated Marginal Means: Intervention**

| Intervention | Mean | Std. Error | 95% Wald Confidence Interval |       |
|--------------|------|------------|------------------------------|-------|
|              |      |            | Lower                        | Upper |
| Control      | .34  | .053       | .25                          | .46   |
| Intervention | .17  | .039       | .11                          | .27   |

\* Generalized Estimating Equations.

GENLIN Foot BY Intervention (ORDER=ASCENDING)

/MODEL Intervention INTERCEPT=YES

DISTRIBUTION=POISSON LINK=LOG

/CRITERIA METHOD=FISHER(1) SCALE=1 MAXITERATIONS=100 MAXSTEPHALVING=5

PCONVERGE=1E-006(ABSOLUTE)

SINGULAR=1E-012 ANALYSISTYPE=3(WALD) CILEVEL=95 LIKELIHOOD=FULL

/EMMEANS TABLES=Intervention SCALE=ORIGINAL

/REPEATED SUBJECT=Team WITHINSUBJECT=Player SORT=YES CORRTYPE=INDEPENDENT ADJUSTCORR=YES

COVB=ROBUST MAXITERATIONS=100 PCONVERGE=1e-006(ABSOLUTE) UPDATECORR=1

/MISSING CLASSMISSING=EXCLUDE

/PRINT CPS DESCRIPTIVES MODELINFO SUMMARY SOLUTION (EXPONENTIATED).

## Generalized Linear Models

| Notes                  |                                | 23-OCT-2020 20:40:27                                                                                                                                                                                                                                                                                                                                                                                                                                                                                                                                                                                                                                                                     |
|------------------------|--------------------------------|------------------------------------------------------------------------------------------------------------------------------------------------------------------------------------------------------------------------------------------------------------------------------------------------------------------------------------------------------------------------------------------------------------------------------------------------------------------------------------------------------------------------------------------------------------------------------------------------------------------------------------------------------------------------------------------|
| Output Created         |                                |                                                                                                                                                                                                                                                                                                                                                                                                                                                                                                                                                                                                                                                                                          |
| Comments               |                                |                                                                                                                                                                                                                                                                                                                                                                                                                                                                                                                                                                                                                                                                                          |
| Input                  | Data                           | /Users//OneDrive - /RCT<br>Study/Kids<br>RCT/Kids_RCT_final.sav                                                                                                                                                                                                                                                                                                                                                                                                                                                                                                                                                                                                                          |
|                        | Active Dataset                 | DataSet1                                                                                                                                                                                                                                                                                                                                                                                                                                                                                                                                                                                                                                                                                 |
|                        | Filter                         | <none>                                                                                                                                                                                                                                                                                                                                                                                                                                                                                                                                                                                                                                                                                   |
|                        | Weight                         | <none>                                                                                                                                                                                                                                                                                                                                                                                                                                                                                                                                                                                                                                                                                   |
|                        | Split File                     | <none>                                                                                                                                                                                                                                                                                                                                                                                                                                                                                                                                                                                                                                                                                   |
|                        | N of Rows in Working Data File | 94                                                                                                                                                                                                                                                                                                                                                                                                                                                                                                                                                                                                                                                                                       |
| Missing Value Handling | Definition of Missing          | User-defined missing values for factor, subject and within-subject variables are treated as missing.                                                                                                                                                                                                                                                                                                                                                                                                                                                                                                                                                                                     |
|                        | Cases Used                     | Statistics are based on cases with valid data for all variables in the model.                                                                                                                                                                                                                                                                                                                                                                                                                                                                                                                                                                                                            |
| Weight Handling        |                                | not applicable                                                                                                                                                                                                                                                                                                                                                                                                                                                                                                                                                                                                                                                                           |
| Syntax                 |                                | GENLIN Foot BY Intervention<br>(ORDER=ASCENDING)<br>/MODEL Intervention<br>INTERCEPT=YES<br>DISTRIBUTION=POISSON<br>LINK=LOG<br>/CRITERIA<br>METHOD=FISHER(1) SCALE=1<br>MAXITERATIONS=100<br>MAXSTEPHALVING=5<br>PCONVERGE=1E-006(ABSOLUTE)<br>SINGULAR=1E-012<br>ANALYSISTYPE=3(WALD)<br>CILEVEL=95<br>LIKELIHOOD=FULL<br>/EMMEANS<br>TABLES=Intervention<br>SCALE=ORIGINAL<br>/REPEATED SUBJECT=Team<br>WITHINSUBJECT=Player<br>SORT=YES<br>CORRTYPE=INDEPENDENT<br>ADJUSTCORR=YES<br>COVB=ROBUST<br>MAXITERATIONS=100<br>PCONVERGE=1e-006(ABSOLUTE)<br>UPDATECORR=1<br>/MISSING<br>CLASSMISSING=EXCLUDE<br>/PRINT CPS DESCRIPTIVES<br>MODELINFO SUMMARY<br>SOLUTION (EXPONENTIATED). |
| Resources              | Processor Time                 | 00:00:00.10                                                                                                                                                                                                                                                                                                                                                                                                                                                                                                                                                                                                                                                                              |
|                        | Elapsed Time                   | 00:00:00.00                                                                                                                                                                                                                                                                                                                                                                                                                                                                                                                                                                                                                                                                              |

### Model Information

|                          |   |         |
|--------------------------|---|---------|
| Dependent Variable       |   | Foot    |
| Probability Distribution |   | Poisson |
| Link Function            |   | Log     |
| Subject Effect           | 1 | Team    |
| Within-Subject Effect    | 1 | Player  |

**Case Processing Summary**

|          | N  | Percent |
|----------|----|---------|
| Included | 93 | 98.9%   |
| Excluded | 1  | 1.1%    |
| Total    | 94 | 100.0%  |

**Correlated Data Summary**

|                                    |                       |        |    |
|------------------------------------|-----------------------|--------|----|
| Number of Levels                   | Subject Effect        | Team   | 6  |
|                                    | Within-Subject Effect | Player | 93 |
| Number of Subjects                 |                       |        | 6  |
| Number of Measurements per Subject | Minimum               |        | 13 |
|                                    | Maximum               |        | 20 |
| Correlation Matrix Dimension       |                       |        | 93 |

**Categorical Variable Information**

| Factor | Intervention |  | N  | Percent |
|--------|--------------|--|----|---------|
|        | Control      |  | 46 | 49.5%   |
|        | Intervention |  | 47 | 50.5%   |
|        | Total        |  | 93 | 100.0%  |

**Continuous Variable Information**

| Dependent Variable | Foot | N  | Minimum | Maximum | Mean | Std. Deviation |
|--------------------|------|----|---------|---------|------|----------------|
|                    |      | 93 | 0       | 2       | .16  | .398           |

**Tests of Model Effects**

| Source       | Wald Chi-Square | Type III df | Sig. |
|--------------|-----------------|-------------|------|
| (Intercept)  | 225.758         | 1           | .000 |
| Intervention | 1.242           | 1           | .265 |

Dependent Variable: Foot  
 Model: (Intercept), Intervention

**Parameter Estimates**

| Parameter        | B              | Std. Error | 95% Wald Confidence Interval |        | Hypothesis Test |    |      | Exp(B) |
|------------------|----------------|------------|------------------------------|--------|-----------------|----|------|--------|
|                  |                |            | Lower                        | Upper  | Wald Chi-Square | df | Sig. |        |
| (Intercept)      | -2.058         | .2513      | -2.551                       | -1.566 | 67.066          | 1  | .000 | .128   |
| [Intervention=0] | .427           | .3832      | -.324                        | 1.178  | 1.242           | 1  | .265 | 1.533  |
| [Intervention=1] | 0 <sup>a</sup> | .          | .                            | .      | .               | .  | .    | 1      |
| (Scale)          | 1              |            |                              |        |                 |    |      |        |

**Parameter Estimates**

| Parameter        | 95% Wald Confidence Interval for Exp(B) |       |
|------------------|-----------------------------------------|-------|
|                  | Lower                                   | Upper |
| (Intercept)      | .078                                    | .209  |
| [Intervention=0] | .723                                    | 3.248 |
| [Intervention=1] | .                                       | .     |
| (Scale)          |                                         |       |

Dependent Variable: Foot  
 Model: (Intercept), Intervention  
 a. Set to zero because this parameter is redundant.

**Estimated Marginal Means: Intervention**

| Intervention | Estimates |            |                                       |       |
|--------------|-----------|------------|---------------------------------------|-------|
|              | Mean      | Std. Error | 95% Wald Confidence Interval<br>Lower | Upper |
| Control      | .20       | .039       | .13                                   | .29   |
| Intervention | .13       | .032       | .08                                   | .21   |
